# Supplementary material for: Circulating amino acids and amino acid-related metabolites and risk of breast cancer among predominantly premenopausal women
Source: PubMed Central journal article supplement (PMC8131633; doi:10.1038/s41523-021-00262-4), 2021-05-18
Supplement: 41523_2021_262_MOESM1_ESM.pdf [file 41523_2021_262_MOESM1_ESM.pdf]

**Supplementary Table 1. : Odds ratios (OR) of breast cancer and 95% confidence intervals (CI) per 1 SD increase for all metabolites in NHSII**

Simple model: adjusts for matching factors including menopause status at blood draw, time of blood draw, date/season of blood draw, luteal day at blood draw, fasting status at blood draw, menopausal status at diagnosis and race.

Adjusted model: in addition to matching factors, this model adjusts for BMI at age 18, weight change between age 18 and time of blood draw, age at menarche, parity and age at first birth, family history of breast cancer, personal history of benign breast disease, physical activity, alcohol consumption, exogenous hormone use, breast feeding history.

| <b>Overall BRCA: cases = 1057, controls = 1057</b> |                                      | <b>Simple Model</b> |             |             | <b>Adjusted Model</b> |             |             |
|----------------------------------------------------|--------------------------------------|---------------------|-------------|-------------|-----------------------|-------------|-------------|
| <b>HMDB ID</b>                                     | <b>Metabolite</b>                    | <b>OR (95% CI)</b>  | <b>PVAL</b> | <b>QVAL</b> | <b>OR (95% CI)</b>    | <b>PVAL</b> | <b>QVAL</b> |
| NA                                                 | DMGV                                 | 0.84 (0.77-0.92)    | 0.00009     | 0.012       | 0.88 (0.79-0.97)      | 0.011       | 0.366       |
| NA                                                 | 2-aminohippuric acid                 | 0.84 (0.76-0.92)    | 0.00014     | 0.012       | 0.85 (0.77-0.93)      | 0.001       | 0.052       |
| HMDB29377                                          | piperine                             | 0.85 (0.78-0.93)    | 0.00046     | 0.025       | 0.84 (0.77-0.92)      | 0.0003      | 0.037       |
| HMDB00715                                          | kynurenic acid                       | 0.87 (0.79-0.95)    | 0.003       | 0.107       | 0.86 (0.78-0.95)      | 0.003       | 0.128       |
| HMDB11394*                                         | C40:7 PE plasmalogen                 | 1.14 (1.05-1.25)    | 0.003       | 0.107       | 1.11 (1.01-1.22)      | 0.030       | 0.432       |
| HMDB00168                                          | asparagine                           | 1.14 (1.04-1.26)    | 0.006       | 0.166       | 1.1 (1-1.22)          | 0.055       | 0.521       |
| HMDB11211*                                         | C34:3 PC plasmalogen                 | 1.13 (1.03-1.23)    | 0.008       | 0.166       | 1.09 (0.99-1.2)       | 0.075       | 0.547       |
| HMDB04824                                          | N2,N2-dimethylguanosine              | 0.88 (0.81-0.97)    | 0.008       | 0.166       | 0.91 (0.83-1)         | 0.060       | 0.530       |
| HMDB10391*                                         | C20:1 LPC                            | 1.13 (1.03-1.25)    | 0.009       | 0.166       | 1.1 (1-1.22)          | 0.052       | 0.521       |
| HMDB06344                                          | phenylacetylglutamine                | 0.89 (0.82-0.97)    | 0.011       | 0.191       | 0.9 (0.82-0.98)       | 0.022       | 0.408       |
| HMDB01565                                          | phosphocholine                       | 1.12 (1.02-1.23)    | 0.018       | 0.252       | 1.09 (0.98-1.2)       | 0.098       | 0.596       |
| HMDB01855                                          | 5-hydroxytryptophol                  | 1.13 (1.02-1.25)    | 0.018       | 0.252       | 1.11 (1-1.24)         | 0.048       | 0.521       |
| HMDB00883                                          | valine                               | 0.9 (0.83-0.99)     | 0.025       | 0.289       | 0.94 (0.85-1.03)      | 0.202       | 0.596       |
| HMDB04400                                          | 5-acetylamino-6-amino-3-methyluracil | 0.91 (0.83-0.99)    | 0.027       | 0.289       | 0.92 (0.84-1.01)      | 0.076       | 0.547       |
| HMDB10404                                          | C22:6 LPC                            | 1.11 (1.01-1.21)    | 0.027       | 0.289       | 1.06 (0.96-1.17)      | 0.227       | 0.603       |
| HMDB11526                                          | C22:6 LPE                            | 1.11 (1.01-1.22)    | 0.029       | 0.289       | 1.08 (0.98-1.2)       | 0.110       | 0.596       |
| HMDB32390                                          | 2-methyl-4,5-benzoxazole             | 0.91 (0.83-0.99)    | 0.030       | 0.289       | 0.91 (0.84-1)         | 0.049       | 0.521       |
| HMDB01257                                          | spermidine                           | 1.11 (1.01-1.23)    | 0.036       | 0.297       | 1.12 (1.01-1.25)      | 0.033       | 0.432       |
| HMDB11103                                          | 1,7-dimethyluric acid                | 0.91 (0.83-0.99)    | 0.036       | 0.297       | 0.92 (0.84-1.01)      | 0.082       | 0.547       |
| HMDB00767                                          | pseudouridine                        | 0.91 (0.83-1)       | 0.039       | 0.297       | 0.93 (0.85-1.03)      | 0.157       | 0.596       |
| HMDB00064                                          | creatine                             | 1.1 (1-1.21)        | 0.039       | 0.297       | 1.13 (1.02-1.25)      | 0.015       | 0.397       |
| HMDB10386*                                         | C18:2 LPC                            | 1.1 (1-1.2)         | 0.040       | 0.297       | 1.05 (0.95-1.16)      | 0.315       | 0.603       |
| HMDB00544                                          | 5-hydroxymethyl-4-methyluracil       | 0.9 (0.82-1)        | 0.043       | 0.297       | 0.92 (0.83-1.02)      | 0.120       | 0.596       |
| HMDB01276                                          | N1-acetylspermidine                  | 1.1 (1-1.21)        | 0.043       | 0.297       | 1.11 (1.01-1.23)      | 0.030       | 0.432       |
| HMDB00687                                          | leucine                              | 0.91 (0.83-1)       | 0.045       | 0.302       | 0.94 (0.86-1.04)      | 0.246       | 0.603       |
| HMDB00172                                          | isoleucine                           | 0.91 (0.83-1)       | 0.049       | 0.313       | 0.95 (0.86-1.04)      | 0.282       | 0.603       |
| HMDB13325                                          | C10:2 carnitine                      | 0.92 (0.84-1)       | 0.056       | 0.341       | 0.93 (0.84-1.02)      | 0.103       | 0.596       |

|            |                                          |                  |       |       |                  |       |       |
|------------|------------------------------------------|------------------|-------|-------|------------------|-------|-------|
| HMDB11511  | C20:0 LPE                                | 1.09 (1-1.19)    | 0.057 | 0.341 | 1.07 (0.97-1.18) | 0.167 | 0.596 |
| HMDB05923  | N4-acetylcytidine                        | 0.92 (0.84-1.01) | 0.065 | 0.367 | 0.96 (0.87-1.05) | 0.387 | 0.603 |
| HMDB11420* | C38:7 PE plasmalogen                     | 1.09 (0.99-1.19) | 0.066 | 0.367 | 1.06 (0.97-1.17) | 0.199 | 0.596 |
| HMDB11503  | C16:0 LPE                                | 1.09 (0.99-1.19) | 0.076 | 0.373 | 1.05 (0.96-1.16) | 0.280 | 0.603 |
| HMDB07883* | C34:4 PC                                 | 0.92 (0.84-1.01) | 0.076 | 0.373 | 0.93 (0.85-1.03) | 0.157 | 0.596 |
| NA         | C46:2 TAG                                | 0.93 (0.85-1.01) | 0.077 | 0.373 | 0.94 (0.86-1.03) | 0.185 | 0.596 |
| NA         | C36:2 PS plasmalogen                     | 1.08 (0.99-1.19) | 0.078 | 0.373 | 1.09 (0.99-1.19) | 0.083 | 0.547 |
| HMDB10169  | C16:0 SM                                 | 1.09 (0.99-1.19) | 0.078 | 0.373 | 1.07 (0.97-1.18) | 0.187 | 0.596 |
| HMDB10407* | C16:1 LPC plasmalogen                    | 1.08 (0.99-1.19) | 0.087 | 0.403 | 1.05 (0.96-1.16) | 0.285 | 0.603 |
| HMDB11229* | C38:7 PC plasmalogen                     | 1.08 (0.99-1.18) | 0.091 | 0.407 | 1.04 (0.94-1.14) | 0.467 | 0.609 |
| HMDB11745  | N-acetylmethionine                       | 1.08 (0.99-1.19) | 0.097 | 0.426 | 1.08 (0.98-1.19) | 0.126 | 0.596 |
| HMDB01431  | pyridoxamine                             | 0.92 (0.83-1.02) | 0.107 | 0.450 | 0.94 (0.85-1.05) | 0.281 | 0.603 |
| HMDB00562  | creatinine                               | 0.93 (0.85-1.02) | 0.108 | 0.450 | 0.92 (0.84-1.01) | 0.078 | 0.547 |
| HMDB00128  | guanidinoacetic acid                     | 1.07 (0.98-1.17) | 0.113 | 0.459 | 1.06 (0.97-1.17) | 0.203 | 0.596 |
| HMDB11507* | C18:2 LPE                                | 1.07 (0.98-1.17) | 0.125 | 0.494 | 1.05 (0.96-1.15) | 0.264 | 0.603 |
| HMDB01414  | putrescine                               | 1.07 (0.98-1.18) | 0.133 | 0.514 | 1.07 (0.97-1.18) | 0.176 | 0.596 |
| NA         | C46:3 TAG                                | 0.94 (0.86-1.02) | 0.139 | 0.524 | 0.95 (0.87-1.04) | 0.309 | 0.603 |
| NA         | C44:2 TAG                                | 0.94 (0.86-1.02) | 0.149 | 0.548 | 0.95 (0.87-1.04) | 0.273 | 0.603 |
| HMDB00824  | C3 carnitine                             | 0.94 (0.86-1.03) | 0.166 | 0.578 | 0.97 (0.88-1.06) | 0.463 | 0.609 |
| HMDB02000  | myristoleic acid                         | 0.94 (0.86-1.03) | 0.169 | 0.578 | 0.97 (0.89-1.06) | 0.523 | 0.609 |
| HMDB13287  | N6,N6-dimethyllysine                     | 0.94 (0.86-1.03) | 0.176 | 0.578 | 0.94 (0.86-1.03) | 0.188 | 0.596 |
| HMDB06347  | C26 carnitine                            | 1.06 (0.97-1.16) | 0.178 | 0.578 | 1.07 (0.98-1.17) | 0.141 | 0.596 |
| NA         | C34:1 DAG_or_TAG_fragment                | 0.94 (0.86-1.03) | 0.179 | 0.578 | 0.99 (0.89-1.09) | 0.822 | 0.613 |
| HMDB01563  | 1-methylguanosine                        | 0.94 (0.86-1.03) | 0.186 | 0.578 | 0.97 (0.88-1.07) | 0.545 | 0.609 |
| HMDB00631* | glycodeoxycholate/glycochenodeoxycholate | 1.06 (0.97-1.16) | 0.186 | 0.578 | 1.08 (0.98-1.18) | 0.123 | 0.596 |
| HMDB11506* | C18:1 LPE                                | 1.06 (0.97-1.16) | 0.186 | 0.578 | 1.05 (0.95-1.15) | 0.341 | 0.603 |
| HMDB00259  | serotonin                                | 1.06 (0.97-1.16) | 0.190 | 0.578 | 1.05 (0.96-1.15) | 0.300 | 0.603 |
| HMDB15168  | cerulenin                                | 0.94 (0.86-1.03) | 0.192 | 0.578 | 0.95 (0.86-1.04) | 0.258 | 0.603 |
| HMDB00054  | bilirubin                                | 0.94 (0.86-1.03) | 0.195 | 0.578 | 0.94 (0.85-1.03) | 0.178 | 0.596 |
| HMDB11517  | C20:4 LPE                                | 1.06 (0.97-1.16) | 0.207 | 0.605 | 1.06 (0.97-1.16) | 0.198 | 0.596 |
| HMDB13127  | C4-OH carnitine                          | 1.06 (0.97-1.16) | 0.218 | 0.623 | 1.13 (1.02-1.24) | 0.019 | 0.408 |
| HMDB01906* | aminoisobutyric acid                     | 1.06 (0.97-1.16) | 0.226 | 0.637 | 1.04 (0.95-1.15) | 0.374 | 0.603 |
| HMDB10384  | C18:0 LPC                                | 1.06 (0.97-1.15) | 0.237 | 0.656 | 1.05 (0.95-1.15) | 0.347 | 0.603 |
| HMDB00187  | serine                                   | 1.05 (0.96-1.16) | 0.260 | 0.695 | 1.05 (0.95-1.15) | 0.340 | 0.603 |
| HMDB02013  | C4 carnitine                             | 0.95 (0.87-1.04) | 0.267 | 0.695 | 0.96 (0.87-1.05) | 0.319 | 0.603 |

|            |                                    |                  |       |       |                  |       |       |
|------------|------------------------------------|------------------|-------|-------|------------------|-------|-------|
| HMDB00206  | N6-acetyllysine                    | 0.95 (0.87-1.04) | 0.280 | 0.695 | 0.95 (0.86-1.05) | 0.316 | 0.603 |
| HMDB00688  | C5 carnitine                       | 0.95 (0.87-1.04) | 0.282 | 0.695 | 0.98 (0.9-1.08)  | 0.754 | 0.609 |
| HMDB00714  | hippurate                          | 1.05 (0.96-1.14) | 0.284 | 0.695 | 1.02 (0.94-1.12) | 0.612 | 0.609 |
| HMDB01539  | ADMA                               | 0.95 (0.86-1.05) | 0.293 | 0.695 | 0.95 (0.86-1.06) | 0.356 | 0.603 |
| HMDB00705  | C6 carnitine                       | 0.95 (0.87-1.04) | 0.299 | 0.695 | 0.98 (0.89-1.08) | 0.648 | 0.609 |
| HMDB02802  | cortisone                          | 0.95 (0.87-1.05) | 0.302 | 0.695 | 0.96 (0.87-1.05) | 0.362 | 0.603 |
| HMDB00182  | lysine                             | 0.95 (0.86-1.05) | 0.302 | 0.695 | 0.97 (0.87-1.08) | 0.554 | 0.609 |
| HMDB00289  | urate                              | 0.95 (0.87-1.05) | 0.313 | 0.695 | 0.97 (0.89-1.07) | 0.579 | 0.609 |
| HMDB01396  | glycocholate                       | 1.05 (0.96-1.14) | 0.314 | 0.695 | 1.06 (0.96-1.16) | 0.231 | 0.603 |
| HMDB04193  | N1-methyl-2-pyridone-5-carboxamide | 0.96 (0.87-1.05) | 0.319 | 0.695 | 0.97 (0.88-1.06) | 0.475 | 0.609 |
| HMDB00725  | hydroxyproline                     | 0.96 (0.88-1.04) | 0.321 | 0.695 | 0.96 (0.88-1.05) | 0.413 | 0.609 |
| HMDB02815* | C18:1 LPC                          | 1.05 (0.96-1.14) | 0.327 | 0.695 | 1.01 (0.91-1.11) | 0.905 | 0.613 |
| HMDB00210  | pantothenate                       | 1.04 (0.96-1.14) | 0.335 | 0.695 | 1.05 (0.95-1.15) | 0.346 | 0.603 |
| HMDB00062  | carnitine                          | 0.96 (0.87-1.05) | 0.337 | 0.695 | 0.97 (0.88-1.07) | 0.527 | 0.609 |
| HMDB03681  | 4-acetamidobutanoate               | 0.96 (0.88-1.05) | 0.344 | 0.695 | 0.96 (0.87-1.05) | 0.372 | 0.603 |
| HMDB00033  | carnosine                          | 0.96 (0.88-1.05) | 0.344 | 0.695 | 0.96 (0.87-1.05) | 0.366 | 0.603 |
| HMDB00043  | betaine                            | 1.05 (0.95-1.15) | 0.352 | 0.695 | 1.04 (0.94-1.15) | 0.441 | 0.609 |
| HMDB01008  | biliverdin                         | 1.04 (0.95-1.14) | 0.355 | 0.695 | 1.04 (0.95-1.14) | 0.427 | 0.609 |
| NA         | C34:3 DAG_or_TAG_fragment          | 0.96 (0.88-1.05) | 0.355 | 0.695 | 1.02 (0.92-1.12) | 0.762 | 0.609 |
| NA         | threosphingosine                   | 0.95 (0.86-1.05) | 0.358 | 0.695 | 0.98 (0.88-1.09) | 0.704 | 0.609 |
| HMDB04827  | proline betaine                    | 0.96 (0.88-1.05) | 0.362 | 0.695 | 0.94 (0.86-1.02) | 0.149 | 0.596 |
| NA         | C34:2 DAG_or_TAG_fragment          | 0.96 (0.88-1.05) | 0.367 | 0.695 | 1.02 (0.92-1.13) | 0.678 | 0.609 |
| HMDB00812  | N-acetylaspartic acid              | 1.04 (0.95-1.14) | 0.370 | 0.695 | 1.04 (0.95-1.15) | 0.397 | 0.609 |
| HMDB13326  | C12:1 carnitine                    | 0.96 (0.88-1.05) | 0.371 | 0.695 | 0.98 (0.89-1.08) | 0.710 | 0.609 |
| HMDB04030  | 21-deoxycortisol                   | 0.96 (0.88-1.05) | 0.372 | 0.695 | 0.95 (0.86-1.04) | 0.293 | 0.603 |
| HMDB00161  | alanine                            | 0.96 (0.87-1.05) | 0.373 | 0.695 | 0.99 (0.9-1.1)   | 0.862 | 0.613 |
| HMDB04620  | N-alpha-acetylarginine             | 0.96 (0.88-1.05) | 0.374 | 0.695 | 0.96 (0.88-1.06) | 0.424 | 0.609 |
| HMDB00791  | C8 carnitine                       | 0.96 (0.88-1.05) | 0.379 | 0.695 | 0.97 (0.89-1.07) | 0.586 | 0.609 |
| HMDB00289  | uric acid                          | 0.96 (0.88-1.05) | 0.387 | 0.695 | 0.98 (0.89-1.08) | 0.699 | 0.609 |
| HMDB04620  | N-alpha-acetyarginine              | 0.96 (0.88-1.05) | 0.387 | 0.695 | 0.96 (0.88-1.06) | 0.429 | 0.609 |
| HMDB08952* | C34:2 PE plasmalogen               | 1.04 (0.95-1.13) | 0.396 | 0.695 | 1.02 (0.93-1.11) | 0.715 | 0.609 |
| HMDB00897  | 7-methylguanine                    | 0.96 (0.87-1.05) | 0.396 | 0.695 | 0.96 (0.87-1.06) | 0.461 | 0.609 |
| HMDB00630  | cytosine                           | 0.96 (0.88-1.05) | 0.401 | 0.695 | 0.96 (0.87-1.05) | 0.340 | 0.603 |
| HMDB34169  | methyl N-methylantranilate         | 1.04 (0.95-1.14) | 0.401 | 0.695 | 1.04 (0.94-1.14) | 0.448 | 0.609 |
| HMDB00651  | C10 carnitine                      | 0.96 (0.88-1.05) | 0.407 | 0.697 | 0.97 (0.88-1.07) | 0.541 | 0.609 |

|            |                                |                  |       |       |                  |       |       |
|------------|--------------------------------|------------------|-------|-------|------------------|-------|-------|
| HMDB15150  | sulfamethoxazole               | 1.05 (0.93-1.19) | 0.414 | 0.697 | 1.05 (0.92-1.19) | 0.468 | 0.609 |
| HMDB00092  | dimethylglycine                | 1.04 (0.95-1.13) | 0.420 | 0.697 | 1.06 (0.97-1.17) | 0.197 | 0.596 |
| HMDB00026  | N-carbamoyl-beta-alanine       | 0.96 (0.88-1.05) | 0.428 | 0.697 | 0.96 (0.87-1.05) | 0.359 | 0.603 |
| HMDB11441* | C36:3 PE plasmalogen           | 1.04 (0.95-1.13) | 0.428 | 0.697 | 1.01 (0.92-1.11) | 0.776 | 0.609 |
| HMDB13130  | C5-DC carnitine                | 0.97 (0.88-1.05) | 0.431 | 0.697 | 0.97 (0.88-1.06) | 0.474 | 0.609 |
| NA         | C36:2 DAG_or_TAG_fragment      | 0.96 (0.88-1.06) | 0.439 | 0.697 | 1.03 (0.93-1.13) | 0.589 | 0.609 |
| HMDB59824  | 4-hydroxy-3-methylacetophenone | 0.96 (0.88-1.06) | 0.443 | 0.697 | 0.99 (0.9-1.1)   | 0.875 | 0.613 |
| HMDB10382  | C16:0 LPC                      | 1.04 (0.95-1.13) | 0.444 | 0.697 | 1.02 (0.93-1.12) | 0.662 | 0.609 |
| HMDB13678  | 4-hydroxyhippurate             | 1.03 (0.95-1.13) | 0.450 | 0.697 | 1.04 (0.95-1.14) | 0.375 | 0.603 |
| HMDB11410* | C36:5 PE plasmalogen           | 1.03 (0.95-1.13) | 0.450 | 0.697 | 1.04 (0.95-1.14) | 0.381 | 0.603 |
| HMDB01847  | caffeine                       | 0.97 (0.88-1.06) | 0.461 | 0.697 | 0.98 (0.89-1.07) | 0.632 | 0.609 |
| HMDB01325  | N6,N6,N6-trimethyllysine       | 0.97 (0.88-1.06) | 0.465 | 0.697 | 0.97 (0.88-1.06) | 0.490 | 0.609 |
| HMDB10383* | C16:1 LPC                      | 0.97 (0.88-1.06) | 0.466 | 0.697 | 0.97 (0.89-1.07) | 0.593 | 0.609 |
| HMDB09003* | C38:4 PE                       | 0.97 (0.89-1.06) | 0.468 | 0.697 | 1 (0.91-1.1)     | 0.944 | 0.613 |
| HMDB00630* | cytosine_isomer                | 1.03 (0.94-1.13) | 0.470 | 0.697 | 1.01 (0.92-1.12) | 0.775 | 0.609 |
| HMDB13331  | C14:2 carnitine                | 0.97 (0.89-1.06) | 0.481 | 0.697 | 0.98 (0.89-1.07) | 0.643 | 0.609 |
| HMDB00991* | 2-aminooctanoic acid           | 1.03 (0.95-1.13) | 0.482 | 0.697 | 1.02 (0.93-1.12) | 0.635 | 0.609 |
| HMDB00641  | glutamine                      | 1.03 (0.94-1.13) | 0.485 | 0.697 | 0.99 (0.9-1.09)  | 0.867 | 0.613 |
| HMDB11253* | C38:5 PE plasmalogen           | 1.03 (0.95-1.12) | 0.493 | 0.697 | 1.04 (0.95-1.14) | 0.355 | 0.603 |
| HMDB00133  | guanosine                      | 0.97 (0.89-1.06) | 0.501 | 0.697 | 0.98 (0.89-1.07) | 0.600 | 0.609 |
| HMDB05862  | 2-methylguanosine              | 1.03 (0.94-1.14) | 0.502 | 0.697 | 1.05 (0.95-1.16) | 0.345 | 0.603 |
| HMDB01859  | acetaminophen                  | 0.97 (0.89-1.06) | 0.503 | 0.697 | 0.95 (0.87-1.04) | 0.269 | 0.603 |
| HMDB01348  | C18:0 SM                       | 1.03 (0.94-1.14) | 0.503 | 0.697 | 1.07 (0.97-1.19) | 0.193 | 0.596 |
| NA         | glutamic acid amide            | 1.03 (0.94-1.13) | 0.515 | 0.703 | 0.99 (0.9-1.09)  | 0.831 | 0.613 |
| HMDB09102* | C38:6 PE                       | 1.03 (0.94-1.13) | 0.519 | 0.703 | 1.02 (0.93-1.12) | 0.692 | 0.609 |
| NA         | N-methylproline                | 0.97 (0.89-1.06) | 0.526 | 0.703 | 0.97 (0.88-1.06) | 0.455 | 0.609 |
| HMDB02250  | C12 carnitine                  | 0.97 (0.89-1.06) | 0.527 | 0.703 | 0.99 (0.9-1.08)  | 0.754 | 0.609 |
| HMDB02064  | N-acetylputrescine             | 0.97 (0.89-1.06) | 0.528 | 0.703 | 0.98 (0.89-1.07) | 0.638 | 0.609 |
| HMDB00063  | cortisol                       | 0.97 (0.88-1.07) | 0.545 | 0.706 | 0.96 (0.87-1.06) | 0.450 | 0.609 |
| NA         | C36:3 PS plasmalogen           | 0.97 (0.89-1.06) | 0.546 | 0.706 | 0.99 (0.9-1.08)  | 0.744 | 0.609 |
| HMDB00991* | 2-aminooctanoic acid           | 0.97 (0.87-1.08) | 0.551 | 0.706 | 0.97 (0.87-1.08) | 0.536 | 0.609 |
| NA         | C16:1 SM                       | 0.97 (0.88-1.07) | 0.553 | 0.706 | 1.01 (0.91-1.12) | 0.849 | 0.613 |
| HMDB00898  | 1-methylhistamine              | 1.03 (0.94-1.12) | 0.558 | 0.706 | 1.01 (0.92-1.11) | 0.768 | 0.609 |
| HMDB12103  | C22:0 SM                       | 0.97 (0.87-1.08) | 0.559 | 0.706 | 0.99 (0.89-1.11) | 0.920 | 0.613 |
| HMDB00853  | N-acetylgalactosamine          | 1.03 (0.93-1.13) | 0.567 | 0.706 | 1.06 (0.96-1.17) | 0.259 | 0.603 |

|                   |                           |                  |       |       |                  |       |       |
|-------------------|---------------------------|------------------|-------|-------|------------------|-------|-------|
| HMDB07869*        | C30:0 PC                  | 0.98 (0.89-1.06) | 0.568 | 0.706 | 0.96 (0.88-1.05) | 0.383 | 0.603 |
| NA                | C38:5 DAG_or_TAG_fragment | 0.97 (0.89-1.07) | 0.570 | 0.706 | 1.02 (0.93-1.13) | 0.649 | 0.609 |
| HMDB10395         | C20:4 LPC                 | 1.02 (0.94-1.12) | 0.590 | 0.727 | 1.01 (0.92-1.11) | 0.817 | 0.613 |
| HMDB00462         | allantoin                 | 0.97 (0.89-1.07) | 0.595 | 0.728 | 1.01 (0.91-1.11) | 0.903 | 0.613 |
| HMDB11220*        | C36:5 PC plasmalogen      | 1.02 (0.94-1.12) | 0.607 | 0.731 | 1.01 (0.92-1.11) | 0.769 | 0.609 |
| HMDB12097         | C14:0 SM                  | 0.98 (0.89-1.07) | 0.608 | 0.731 | 0.98 (0.89-1.08) | 0.643 | 0.609 |
| HMDB09012*        | C40:6 PE                  | 0.98 (0.89-1.07) | 0.614 | 0.731 | 0.99 (0.9-1.09)  | 0.864 | 0.613 |
| HMDB05066         | C14 carnitine             | 1.02 (0.94-1.12) | 0.616 | 0.731 | 1.04 (0.95-1.14) | 0.360 | 0.603 |
| HMDB00301         | urocanic acid             | 0.98 (0.88-1.08) | 0.621 | 0.732 | 1 (0.9-1.1)      | 0.931 | 0.613 |
| HMDB07874*        | C32:2 PC                  | 0.98 (0.9-1.07)  | 0.631 | 0.738 | 0.99 (0.9-1.09)  | 0.839 | 0.613 |
| HMDB10403         | C22:5 LPC                 | 0.98 (0.9-1.07)  | 0.649 | 0.740 | 0.95 (0.87-1.05) | 0.316 | 0.603 |
| HMDB00696         | methionine                | 1.02 (0.93-1.12) | 0.654 | 0.740 | 1.01 (0.92-1.12) | 0.813 | 0.613 |
| HMDB03334         | SDMA                      | 0.98 (0.88-1.08) | 0.657 | 0.740 | 0.96 (0.86-1.07) | 0.413 | 0.609 |
| HMDB05015         | gabapentin                | 1.04 (0.88-1.23) | 0.658 | 0.740 | 1.03 (0.87-1.23) | 0.708 | 0.609 |
| HMDB10379         | C14:0 LPC                 | 0.98 (0.9-1.07)  | 0.661 | 0.740 | 0.99 (0.9-1.08)  | 0.799 | 0.613 |
| HMDB11343*        | C34:3 PE plasmalogen      | 1.02 (0.93-1.11) | 0.664 | 0.740 | 1 (0.92-1.1)     | 0.928 | 0.613 |
| HMDB11478*        | C18:3 LPE                 | 1.02 (0.93-1.11) | 0.672 | 0.740 | 0.99 (0.91-1.09) | 0.905 | 0.613 |
| HMDB02014         | C14:1 carnitine           | 0.98 (0.9-1.07)  | 0.673 | 0.740 | 1 (0.91-1.09)    | 0.931 | 0.613 |
| HMDB08994*        | C36:2 PE                  | 0.98 (0.9-1.07)  | 0.673 | 0.740 | 1.01 (0.92-1.11) | 0.876 | 0.613 |
| HMDB00679         | homocitrulline            | 0.98 (0.89-1.08) | 0.676 | 0.740 | 0.97 (0.88-1.07) | 0.546 | 0.609 |
| HMDB00719         | homoserine                | 1.02 (0.92-1.13) | 0.686 | 0.743 | 1.02 (0.92-1.14) | 0.694 | 0.609 |
| HMDB00716         | pipecolic acid            | 0.98 (0.89-1.08) | 0.689 | 0.743 | 0.99 (0.89-1.09) | 0.765 | 0.609 |
| HMDB00158         | tyrosine                  | 0.98 (0.9-1.08)  | 0.696 | 0.744 | 1.01 (0.91-1.11) | 0.892 | 0.613 |
| Internal Standard | valine-d8                 | 0.98 (0.88-1.09) | 0.702 | 0.744 | 0.98 (0.88-1.1)  | 0.760 | 0.609 |
| HMDB08928*        | C34:2 PE                  | 0.98 (0.9-1.08)  | 0.716 | 0.744 | 1 (0.91-1.1)     | 0.958 | 0.619 |
| HMDB04207         | alpha-glutamyllysine      | 1.02 (0.92-1.13) | 0.720 | 0.744 | 1.03 (0.92-1.15) | 0.623 | 0.609 |
| HMDB04953*        | C24:1 Ceramide (d18:1)    | 0.98 (0.9-1.08)  | 0.725 | 0.744 | 0.99 (0.9-1.09)  | 0.854 | 0.613 |
| HMDB01476         | 3-hydroxyanthranilic acid | 1.02 (0.93-1.12) | 0.727 | 0.744 | 1.03 (0.93-1.13) | 0.581 | 0.609 |
| HMDB03282         | 1-methylguanine           | 0.98 (0.9-1.08)  | 0.736 | 0.744 | 1 (0.91-1.1)     | 0.941 | 0.613 |
| HMDB13713         | N-acetyltryptophan        | 0.99 (0.91-1.07) | 0.737 | 0.744 | 0.96 (0.88-1.05) | 0.419 | 0.609 |
| HMDB08937*        | C36:4 PE                  | 0.98 (0.9-1.08)  | 0.738 | 0.744 | 0.99 (0.9-1.1)   | 0.897 | 0.613 |
| HMDB00248         | thyroxine                 | 0.98 (0.9-1.08)  | 0.739 | 0.744 | 1.02 (0.92-1.12) | 0.753 | 0.609 |
| HMDB00167         | threonine                 | 1.02 (0.92-1.13) | 0.740 | 0.744 | 1.02 (0.91-1.13) | 0.744 | 0.609 |
| HMDB03357         | N-acetylornithine         | 1.02 (0.93-1.11) | 0.743 | 0.744 | 0.99 (0.9-1.09)  | 0.805 | 0.613 |
| HMDB00001         | 1-methylhistidine         | 0.99 (0.9-1.08)  | 0.748 | 0.745 | 0.98 (0.89-1.07) | 0.609 | 0.609 |

|                   |                           |                  |       |       |                  |       |       |
|-------------------|---------------------------|------------------|-------|-------|------------------|-------|-------|
| HMDB00201         | C2 carnitine              | 0.99 (0.9-1.08)  | 0.759 | 0.750 | 1.01 (0.92-1.11) | 0.798 | 0.613 |
| HMDB32055         | N-acetylhistidine         | 0.99 (0.9-1.08)  | 0.762 | 0.750 | 0.98 (0.89-1.07) | 0.611 | 0.609 |
| HMDB00925         | trimethylamine-N-oxide    | 1.01 (0.93-1.1)  | 0.775 | 0.757 | 1.04 (0.95-1.14) | 0.385 | 0.603 |
| HMDB02172         | diacetylspermine          | 1.01 (0.93-1.11) | 0.783 | 0.759 | 1.03 (0.94-1.13) | 0.504 | 0.609 |
| NA                | C36:4 DAG_or_TAG_fragment | 1.01 (0.93-1.1)  | 0.785 | 0.759 | 1.06 (0.97-1.17) | 0.186 | 0.596 |
| HMDB04949         | C16:0 Ceramide (d18:1)    | 1.01 (0.92-1.11) | 0.798 | 0.766 | 1.03 (0.93-1.13) | 0.585 | 0.609 |
| HMDB02172         | N1,N12-diacetylspermine   | 1.01 (0.92-1.11) | 0.807 | 0.767 | 1.03 (0.94-1.13) | 0.502 | 0.609 |
| HMDB29416         | NMMA                      | 0.99 (0.89-1.09) | 0.808 | 0.767 | 1.02 (0.91-1.13) | 0.777 | 0.609 |
| HMDB00479         | methylhistidine           | 0.99 (0.91-1.08) | 0.827 | 0.778 | 0.98 (0.9-1.08)  | 0.720 | 0.609 |
| HMDB02366         | C5:1 carnitine            | 0.99 (0.91-1.08) | 0.831 | 0.778 | 0.99 (0.9-1.09)  | 0.843 | 0.613 |
| NA                | C34:1 DAG_or_TAG_fragment | 1.01 (0.92-1.1)  | 0.836 | 0.778 | 1.07 (0.97-1.17) | 0.191 | 0.596 |
| HMDB00875         | trigonelline              | 0.99 (0.91-1.08) | 0.838 | 0.778 | 0.98 (0.9-1.08)  | 0.742 | 0.609 |
| HMDB00162         | proline                   | 0.99 (0.91-1.08) | 0.846 | 0.778 | 1 (0.91-1.1)     | 0.972 | 0.622 |
| HMDB00159         | phenylalanine             | 1.01 (0.92-1.11) | 0.847 | 0.778 | 1.03 (0.94-1.14) | 0.519 | 0.609 |
| HMDB00112         | GABA                      | 1.01 (0.92-1.1)  | 0.852 | 0.778 | 1.03 (0.94-1.14) | 0.492 | 0.609 |
| HMDB00699         | 1-methylnicotinamide      | 0.99 (0.91-1.09) | 0.863 | 0.784 | 0.97 (0.88-1.07) | 0.525 | 0.609 |
| HMDB13288         | C9 carnitine              | 0.99 (0.91-1.08) | 0.869 | 0.784 | 0.99 (0.9-1.08)  | 0.778 | 0.609 |
| NA                | ectoine                   | 1.01 (0.92-1.1)  | 0.873 | 0.784 | 1.01 (0.92-1.1)  | 0.873 | 0.613 |
| HMDB13631         | oleoyl glycine            | 1.01 (0.92-1.1)  | 0.887 | 0.784 | 1.01 (0.92-1.12) | 0.766 | 0.609 |
| HMDB00929         | tryptophan                | 1.01 (0.92-1.1)  | 0.893 | 0.784 | 0.99 (0.91-1.09) | 0.900 | 0.613 |
| HMDB11512*        | C20:1 LPE                 | 0.99 (0.91-1.09) | 0.896 | 0.784 | 0.98 (0.89-1.07) | 0.648 | 0.609 |
| HMDB11756         | N-acetylleucine           | 1.01 (0.92-1.1)  | 0.896 | 0.784 | 1.05 (0.95-1.15) | 0.349 | 0.603 |
| Internal Standard | phenylalanine-d8          | 1.01 (0.9-1.13)  | 0.901 | 0.784 | 1 (0.89-1.12)    | 0.965 | 0.620 |
| HMDB10387*        | C18:3 LPC                 | 0.99 (0.91-1.09) | 0.902 | 0.784 | 0.98 (0.89-1.08) | 0.740 | 0.609 |
| HMDB08925*        | C34:0 PE                  | 1 (0.92-1.09)    | 0.914 | 0.784 | 0.99 (0.91-1.09) | 0.908 | 0.613 |
| HMDB01886         | 3-methylxanthine          | 1 (0.91-1.09)    | 0.915 | 0.784 | 1.02 (0.93-1.12) | 0.658 | 0.609 |
| HMDB12102         | C20:0 SM                  | 1 (0.91-1.11)    | 0.925 | 0.784 | 1.02 (0.92-1.13) | 0.698 | 0.609 |
| HMDB13238         | C7 carnitine              | 1 (0.92-1.1)     | 0.929 | 0.784 | 1.02 (0.93-1.11) | 0.723 | 0.609 |
| NA                | C20:4 carnitine           | 1 (0.92-1.1)     | 0.933 | 0.784 | 1.01 (0.92-1.11) | 0.762 | 0.609 |
| NA                | C34:2 DAG_or_TAG_fragment | 1 (0.91-1.09)    | 0.935 | 0.784 | 1.05 (0.95-1.15) | 0.339 | 0.603 |
| HMDB01991         | 7-methylxanthine          | 1 (0.91-1.09)    | 0.937 | 0.784 | 1.02 (0.93-1.12) | 0.655 | 0.609 |
| HMDB00853         | acetyl-galactosamine      | 1 (0.91-1.11)    | 0.945 | 0.784 | 1.04 (0.93-1.15) | 0.506 | 0.609 |
| NA                | hydroxyectoine            | 1 (0.91-1.09)    | 0.954 | 0.784 | 0.99 (0.9-1.09)  | 0.853 | 0.613 |
| HMDB00884         | ribothymidine             | 1 (0.91-1.09)    | 0.955 | 0.784 | 0.97 (0.89-1.07) | 0.555 | 0.609 |
| HMDB00123         | glycine                   | 1 (0.92-1.09)    | 0.961 | 0.784 | 0.98 (0.89-1.08) | 0.649 | 0.609 |

|            |                             |               |       |       |                  |       |       |
|------------|-----------------------------|---------------|-------|-------|------------------|-------|-------|
| HMDB00904  | citrulline                  | 1 (0.91-1.09) | 0.964 | 0.784 | 0.99 (0.9-1.09)  | 0.864 | 0.613 |
| HMDB07973* | C34:2 PC                    | 1 (0.91-1.1)  | 0.965 | 0.784 | 1 (0.9-1.1)      | 0.932 | 0.613 |
| HMDB00177  | histidine                   | 1 (0.9-1.1)   | 0.968 | 0.784 | 1 (0.9-1.11)     | 0.942 | 0.613 |
| HMDB02820  | methylimidazole acetic acid | 1 (0.92-1.09) | 0.978 | 0.789 | 0.99 (0.91-1.09) | 0.879 | 0.613 |
| NA         | C36:3 DAG_or_TAG_fragment   | 1 (0.92-1.09) | 0.994 | 0.798 | 1.07 (0.97-1.18) | 0.179 | 0.596 |

**Supplemental Table 2. : Odds ratios (OR) of breast cancer and 95% confidence intervals (CI) per 1 SD increase for all metabolites among premenopausal women at blood collection.**

Simple model: adjusts for matching factors including menopause status at blood draw, time of blood draw, date/season of blood draw, luteal day at blood draw, fasting status at blood draw, menopausal status at diagnosis and race.

Adjusted model: in addition to matching factors, this model adjusts for BMI at age 18, weight change between age 18 and time of blood draw, age at menarche, parity and age at first birth, family history of breast cancer, personal history of benign breast disease, physical activity, alcohol consumption, exogenous hormone use, breast feeding history.

| <b>Premenopausal at blood draw: cases = 838, controls = 838</b> |                                      | <b>Simple Model</b> |             | <b>Adjusted Model</b> |             |
|-----------------------------------------------------------------|--------------------------------------|---------------------|-------------|-----------------------|-------------|
| <b>HMDB ID</b>                                                  | <b>Metabolite</b>                    | <b>OR (95% CI)</b>  | <b>PVAL</b> | <b>OR (95% CI)</b>    | <b>PVAL</b> |
| NA                                                              | 2-aminohippuric acid                 | 0.82 (0.74-0.9)     | <0.001      | 0.82 (0.73-0.91)      | <0.001      |
| HMDB29377                                                       | piperine                             | 0.84 (0.76-0.92)    | <0.001      | 0.82 (0.74-0.91)      | <0.001      |
| NA                                                              | DMGV                                 | 0.83 (0.76-0.92)    | <0.001      | 0.86 (0.77-0.96)      | 0.007       |
| HMDB00715                                                       | kynurenic acid                       | 0.84 (0.75-0.93)    | 0.001       | 0.82 (0.73-0.92)      | 0.001       |
| HMDB11394*                                                      | C40:7 PE plasmalogen                 | 1.15 (1.04-1.26)    | 0.007       | 1.12 (1.01-1.25)      | 0.03        |
| HMDB00168                                                       | asparagine                           | 1.14 (1.03-1.27)    | 0.014       | 1.12 (1-1.25)         | 0.051       |
| HMDB11211*                                                      | C34:3 PC plasmalogen                 | 1.13 (1.02-1.25)    | 0.016       | 1.11 (0.99-1.24)      | 0.064       |
| HMDB06344                                                       | phenylacetylglutamine                | 0.88 (0.8-0.98)     | 0.018       | 0.9 (0.81-1)          | 0.055       |
| HMDB01257                                                       | spermidine                           | 1.14 (1.02-1.27)    | 0.022       | 1.14 (1.02-1.29)      | 0.023       |
| HMDB10391*                                                      | C20:1 LPC                            | 1.14 (1.02-1.27)    | 0.023       | 1.12 (1-1.26)         | 0.052       |
| HMDB04400                                                       | 5-acetylamino-6-amino-3-methyluracil | 0.9 (0.81-0.99)     | 0.025       | 0.91 (0.82-1)         | 0.06        |
| HMDB11103                                                       | 1,7-dimethyluric acid                | 0.89 (0.81-0.99)    | 0.026       | 0.9 (0.81-1)          | 0.056       |
| HMDB01855                                                       | 5-hydroxytryptophol                  | 1.14 (1.01-1.27)    | 0.03        | 1.11 (0.99-1.25)      | 0.08        |
| HMDB04824                                                       | N2,N2-dimethylguanosine              | 0.89 (0.81-0.99)    | 0.035       | 0.91 (0.81-1.01)      | 0.086       |
| HMDB02000                                                       | myristoleic acid                     | 0.9 (0.81-0.99)     | 0.037       | 0.92 (0.83-1.03)      | 0.137       |
| HMDB01565                                                       | phosphocholine                       | 1.12 (1.01-1.24)    | 0.037       | 1.08 (0.97-1.21)      | 0.17        |
| HMDB32390                                                       | 2-methyl-4,5-benzoxazole             | 0.9 (0.82-1)        | 0.044       | 0.91 (0.82-1.01)      | 0.078       |
| HMDB01276                                                       | N1-acetylspermidine                  | 1.11 (1-1.23)       | 0.051       | 1.11 (1-1.24)         | 0.061       |
| HMDB13325                                                       | C10:2 carnitine                      | 0.91 (0.82-1)       | 0.054       | 0.92 (0.83-1.02)      | 0.12        |
| HMDB00064                                                       | creatine                             | 1.1 (0.99-1.22)     | 0.067       | 1.13 (1.01-1.26)      | 0.032       |
| HMDB10404                                                       | C22:6 LPC                            | 1.1 (0.99-1.22)     | 0.07        | 1.06 (0.95-1.18)      | 0.336       |
| HMDB10386*                                                      | C18:2 LPC                            | 1.1 (0.99-1.22)     | 0.081       | 1.06 (0.94-1.18)      | 0.348       |
| HMDB11503                                                       | C16:0 LPE                            | 1.09 (0.99-1.21)    | 0.087       | 1.07 (0.96-1.2)       | 0.208       |
| HMDB11229*                                                      | C38:7 PC plasmalogen                 | 1.09 (0.98-1.2)     | 0.099       | 1.05 (0.95-1.17)      | 0.345       |
| HMDB10407*                                                      | C16:1 LPC plasmalogen                | 1.1 (0.98-1.22)     | 0.1         | 1.08 (0.96-1.21)      | 0.204       |



|            |                                |                  |       |                  |       |
|------------|--------------------------------|------------------|-------|------------------|-------|
| HMDB13287  | N6,N6-dimethyllysine           | 0.92 (0.83-1.02) | 0.109 | 0.92 (0.83-1.02) | 0.097 |
| HMDB11526  | C22:6 LPE                      | 1.09 (0.98-1.21) | 0.12  | 1.06 (0.95-1.19) | 0.271 |
| HMDB10169  | C16:0 SM                       | 1.08 (0.98-1.2)  | 0.137 | 1.09 (0.97-1.21) | 0.136 |
| HMDB11511  | C20:0 LPE                      | 1.08 (0.97-1.2)  | 0.143 | 1.08 (0.96-1.22) | 0.178 |
| HMDB00767  | pseudouridine                  | 0.93 (0.84-1.03) | 0.152 | 0.95 (0.85-1.06) | 0.336 |
| HMDB15168  | cerulenin                      | 0.93 (0.84-1.03) | 0.156 | 0.93 (0.84-1.04) | 0.195 |
| HMDB11745  | N-acetylmethionine             | 1.08 (0.97-1.2)  | 0.157 | 1.08 (0.97-1.21) | 0.162 |
| HMDB01563  | 1-methylguanosine              | 0.93 (0.83-1.03) | 0.158 | 0.94 (0.84-1.05) | 0.303 |
| HMDB01859  | acetaminophen                  | 0.93 (0.84-1.03) | 0.159 | 0.9 (0.81-1.01)  | 0.067 |
| HMDB11517  | C20:4 LPE                      | 1.08 (0.97-1.19) | 0.162 | 1.08 (0.97-1.2)  | 0.154 |
| HMDB00562  | creatinine                     | 0.93 (0.84-1.03) | 0.172 | 0.92 (0.83-1.02) | 0.125 |
| HMDB07883* | C34:4 PC                       | 0.93 (0.84-1.03) | 0.172 | 0.93 (0.84-1.04) | 0.203 |
| HMDB00544  | 5-hydroxymethyl-4-methyluracil | 0.93 (0.83-1.03) | 0.175 | 0.95 (0.84-1.06) | 0.364 |
| HMDB00991* | 2-aminooctanoic acid           | 1.07 (0.97-1.18) | 0.176 | 1.06 (0.96-1.18) | 0.235 |
| HMDB13678  | 4-hydroxyhippurate             | 1.07 (0.97-1.19) | 0.177 | 1.07 (0.97-1.19) | 0.184 |
| HMDB00883  | valine                         | 0.93 (0.85-1.03) | 0.178 | 0.96 (0.86-1.07) | 0.501 |
| HMDB06347  | C26 carnitine                  | 1.07 (0.97-1.18) | 0.184 | 1.08 (0.98-1.19) | 0.133 |
| HMDB00133  | guanosine                      | 0.94 (0.85-1.03) | 0.185 | 0.94 (0.85-1.04) | 0.218 |
| HMDB01906* | aminoisobutyric acid           | 1.07 (0.97-1.19) | 0.185 | 1.05 (0.95-1.17) | 0.341 |
| HMDB11253* | C38:5 PE plasmalogen           | 1.07 (0.97-1.18) | 0.187 | 1.08 (0.98-1.2)  | 0.122 |
| HMDB13127  | C4-OH carnitine                | 1.07 (0.97-1.18) | 0.197 | 1.13 (1.01-1.26) | 0.034 |
| HMDB01539  | ADMA                           | 0.93 (0.84-1.04) | 0.2   | 0.93 (0.83-1.04) | 0.181 |
| NA         | C46:2 TAG                      | 0.94 (0.85-1.03) | 0.201 | 0.95 (0.86-1.05) | 0.332 |
| HMDB11507* | C18:2 LPE                      | 1.07 (0.97-1.18) | 0.203 | 1.06 (0.95-1.17) | 0.312 |
| HMDB00128  | guanidinoacetic acid           | 1.07 (0.97-1.18) | 0.205 | 1.07 (0.96-1.19) | 0.244 |
| HMDB11506* | C18:1 LPE                      | 1.07 (0.97-1.18) | 0.205 | 1.05 (0.95-1.17) | 0.356 |
| HMDB00853  | N-acetylgalactosamine          | 1.07 (0.96-1.2)  | 0.206 | 1.11 (0.99-1.25) | 0.066 |
| HMDB11420* | C38:7 PE plasmalogen           | 1.07 (0.97-1.18) | 0.206 | 1.05 (0.94-1.16) | 0.408 |
| NA         | C36:2 PS plasmalogen           | 1.07 (0.96-1.18) | 0.213 | 1.08 (0.97-1.2)  | 0.169 |
| HMDB15150  | sulfamethoxazole               | 1.09 (0.95-1.25) | 0.224 | 1.09 (0.94-1.25) | 0.261 |
| HMDB02802  | cortisone                      | 0.94 (0.85-1.04) | 0.225 | 0.94 (0.85-1.05) | 0.288 |
| HMDB00687  | leucine                        | 0.94 (0.85-1.04) | 0.227 | 0.96 (0.87-1.07) | 0.497 |
| HMDB05923  | N4-acetylcytidine              | 0.94 (0.85-1.04) | 0.228 | 0.98 (0.88-1.09) | 0.668 |
| HMDB01396  | glycocholate                   | 1.06 (0.96-1.18) | 0.23  | 1.07 (0.96-1.19) | 0.227 |

|            |                                          |                  |       |                  |       |
|------------|------------------------------------------|------------------|-------|------------------|-------|
| HMDB00054  | bilirubin                                | 0.94 (0.86-1.04) | 0.232 | 0.94 (0.85-1.04) | 0.226 |
| HMDB00248  | thyroxine                                | 0.94 (0.85-1.04) | 0.236 | 0.97 (0.87-1.08) | 0.575 |
| HMDB00631* | glycodeoxycholate/glycochenodeoxycholate | 1.06 (0.96-1.18) | 0.247 | 1.07 (0.96-1.19) | 0.211 |
| HMDB00210  | pantothenate                             | 1.06 (0.96-1.18) | 0.259 | 1.06 (0.95-1.18) | 0.331 |
| HMDB01414  | putrescine                               | 1.06 (0.95-1.18) | 0.269 | 1.04 (0.93-1.17) | 0.459 |
| HMDB00172  | isoleucine                               | 0.95 (0.86-1.04) | 0.271 | 0.97 (0.88-1.08) | 0.623 |
| HMDB10384  | C18:0 LPC                                | 1.06 (0.95-1.18) | 0.277 | 1.06 (0.95-1.19) | 0.285 |
| NA         | C46:3 TAG                                | 0.95 (0.86-1.04) | 0.281 | 0.96 (0.87-1.07) | 0.472 |
| HMDB05066  | C14 carnitine                            | 1.06 (0.96-1.16) | 0.282 | 1.08 (0.97-1.2)  | 0.146 |
| HMDB00043  | betaine                                  | 1.06 (0.95-1.19) | 0.288 | 1.05 (0.93-1.18) | 0.404 |
| HMDB11441* | C36:3 PE plasmalogen                     | 1.05 (0.95-1.17) | 0.295 | 1.04 (0.94-1.16) | 0.436 |
| HMDB00630  | cytosine                                 | 0.95 (0.86-1.05) | 0.3   | 0.94 (0.85-1.04) | 0.253 |
| HMDB11410* | C36:5 PE plasmalogen                     | 1.05 (0.95-1.16) | 0.303 | 1.06 (0.96-1.17) | 0.27  |
| HMDB00206  | N6-acetyllysine                          | 0.95 (0.85-1.05) | 0.307 | 0.95 (0.85-1.06) | 0.324 |
| HMDB00714  | hippurate                                | 1.05 (0.95-1.16) | 0.325 | 1.02 (0.92-1.13) | 0.646 |
| HMDB00259  | serotonin                                | 1.05 (0.95-1.16) | 0.336 | 1.04 (0.94-1.15) | 0.461 |
| HMDB11220* | C36:5 PC plasmalogen                     | 1.05 (0.95-1.16) | 0.337 | 1.04 (0.94-1.15) | 0.454 |
| NA         | C34:1 DAG_or_TAG_fragment                | 0.95 (0.86-1.06) | 0.346 | 0.99 (0.89-1.12) | 0.913 |
| HMDB02820  | methylimidazole acetic acid              | 0.95 (0.87-1.05) | 0.347 | 0.94 (0.85-1.04) | 0.259 |
| HMDB08952* | C34:2 PE plasmalogen                     | 1.05 (0.95-1.16) | 0.36  | 1.03 (0.93-1.14) | 0.589 |
| HMDB03357  | N-acetylornithine                        | 1.05 (0.95-1.16) | 0.362 | 1.02 (0.92-1.14) | 0.658 |
| HMDB00092  | dimethylglycine                          | 1.05 (0.95-1.15) | 0.372 | 1.06 (0.96-1.18) | 0.248 |
| HMDB01991  | 7-methylxanthine                         | 0.96 (0.87-1.06) | 0.381 | 0.98 (0.88-1.09) | 0.678 |
| HMDB13326  | C12:1 carnitine                          | 0.96 (0.87-1.06) | 0.393 | 0.98 (0.88-1.08) | 0.674 |
| NA         | C44:2 TAG                                | 0.96 (0.87-1.06) | 0.396 | 0.97 (0.88-1.07) | 0.534 |
| HMDB34169  | methyl N-methylanthranilate              | 1.04 (0.94-1.15) | 0.41  | 1.04 (0.93-1.15) | 0.493 |
| HMDB01431  | pyridoxamine                             | 0.95 (0.85-1.07) | 0.412 | 0.98 (0.87-1.11) | 0.754 |
| HMDB01847  | caffeine                                 | 0.96 (0.87-1.06) | 0.415 | 0.97 (0.87-1.07) | 0.532 |
| HMDB00301  | urocanic acid                            | 0.95 (0.85-1.07) | 0.415 | 0.99 (0.88-1.11) | 0.865 |
| NA         | C36:2 DAG_or_TAG_fragment                | 0.96 (0.86-1.06) | 0.422 | 1.01 (0.91-1.13) | 0.805 |
| NA         | C34:3 DAG_or_TAG_fragment                | 0.96 (0.87-1.06) | 0.436 | 1.01 (0.91-1.13) | 0.797 |
| HMDB04030  | 21-deoxycortisol                         | 0.96 (0.87-1.06) | 0.437 | 0.95 (0.86-1.06) | 0.358 |
| HMDB02815* | C18:1 LPC                                | 1.04 (0.94-1.16) | 0.439 | 1 (0.9-1.12)     | 0.944 |
| HMDB10395  | C20:4 LPC                                | 1.04 (0.94-1.15) | 0.44  | 1.03 (0.92-1.14) | 0.651 |

|            |                                    |                  |       |                  |       |
|------------|------------------------------------|------------------|-------|------------------|-------|
| NA         | C34:2 DAG_or_TAG_fragment          | 0.96 (0.87-1.06) | 0.44  | 1.02 (0.91-1.14) | 0.751 |
| HMDB13713  | N-acetyltryptophan                 | 0.96 (0.88-1.06) | 0.442 | 0.94 (0.85-1.04) | 0.227 |
| HMDB02172  | diacetylspermine                   | 1.04 (0.94-1.15) | 0.445 | 1.06 (0.96-1.18) | 0.243 |
| HMDB04949  | C16:0 Ceramide (d18:1)             | 1.04 (0.94-1.16) | 0.447 | 1.07 (0.96-1.19) | 0.252 |
| HMDB10382  | C16:0 LPC                          | 1.04 (0.94-1.16) | 0.45  | 1.04 (0.93-1.16) | 0.528 |
| HMDB04620  | N-alpha-acetylarginine             | 0.96 (0.87-1.06) | 0.45  | 0.97 (0.87-1.08) | 0.548 |
| HMDB01348  | C18:0 SM                           | 1.04 (0.94-1.16) | 0.458 | 1.08 (0.96-1.2)  | 0.202 |
| HMDB00289  | urate                              | 0.97 (0.88-1.06) | 0.47  | 0.98 (0.89-1.08) | 0.69  |
| HMDB04620  | N-alpha-acetyarginine              | 0.96 (0.87-1.06) | 0.474 | 0.97 (0.87-1.08) | 0.553 |
| HMDB04193  | N1-methyl-2-pyridone-5-carboxamide | 0.96 (0.87-1.07) | 0.474 | 0.97 (0.87-1.08) | 0.581 |
| HMDB00187  | serine                             | 1.04 (0.94-1.15) | 0.476 | 1.04 (0.93-1.16) | 0.5   |
| HMDB00925  | trimethylamine-N-oxide             | 1.04 (0.94-1.14) | 0.483 | 1.07 (0.97-1.18) | 0.194 |
| HMDB01008  | biliverdin                         | 1.03 (0.94-1.13) | 0.484 | 1.03 (0.94-1.14) | 0.491 |
| HMDB02013  | C4 carnitine                       | 0.97 (0.88-1.06) | 0.497 | 0.96 (0.87-1.07) | 0.484 |
| NA         | threosphingosine                   | 0.96 (0.86-1.07) | 0.5   | 0.99 (0.88-1.11) | 0.811 |
| HMDB10383* | C16:1 LPC                          | 0.96 (0.87-1.07) | 0.504 | 0.97 (0.87-1.08) | 0.619 |
| HMDB00651  | C10 carnitine                      | 0.97 (0.87-1.07) | 0.504 | 0.98 (0.88-1.09) | 0.712 |
| HMDB00033  | carnosine                          | 0.97 (0.88-1.07) | 0.506 | 0.96 (0.86-1.06) | 0.417 |
| HMDB00159  | phenylalanine                      | 1.04 (0.93-1.15) | 0.507 | 1.05 (0.95-1.18) | 0.338 |
| HMDB02172  | N1,N12-diacetylspermine            | 1.03 (0.94-1.14) | 0.515 | 1.06 (0.95-1.17) | 0.302 |
| HMDB00001  | 1-methylhistidine                  | 0.97 (0.88-1.07) | 0.518 | 0.95 (0.86-1.05) | 0.322 |
| HMDB00479  | methylhistidine                    | 0.97 (0.88-1.07) | 0.521 | 0.95 (0.86-1.06) | 0.352 |
| HMDB00824  | C3 carnitine                       | 0.97 (0.88-1.07) | 0.525 | 0.99 (0.89-1.1)  | 0.857 |
| HMDB00884  | ribothymidine                      | 0.97 (0.88-1.07) | 0.528 | 0.95 (0.86-1.06) | 0.374 |
| HMDB11756  | N-acetylleucine                    | 1.03 (0.93-1.15) | 0.536 | 1.08 (0.97-1.21) | 0.175 |
| HMDB01886  | 3-methylxanthine                   | 0.97 (0.88-1.07) | 0.538 | 1 (0.9-1.11)     | 0.933 |
| HMDB00791  | C8 carnitine                       | 0.97 (0.88-1.07) | 0.539 | 0.99 (0.89-1.1)  | 0.797 |
| HMDB00812  | N-acetylaspartic acid              | 1.03 (0.93-1.15) | 0.548 | 1.03 (0.92-1.15) | 0.572 |
| HMDB00289  | uric acid                          | 0.97 (0.89-1.07) | 0.555 | 0.99 (0.9-1.09)  | 0.811 |
| HMDB59824  | 4-hydroxy-3-methylacetophenone     | 0.97 (0.87-1.08) | 0.558 | 0.99 (0.89-1.11) | 0.873 |
| HMDB04207  | alpha-glutamyllysine               | 1.04 (0.92-1.16) | 0.562 | 1.06 (0.93-1.19) | 0.383 |
| HMDB29416  | NMMA                               | 0.97 (0.86-1.09) | 0.564 | 0.99 (0.88-1.13) | 0.917 |
| HMDB01325  | N6,N6,N6-trimethyllysine           | 0.97 (0.88-1.08) | 0.569 | 0.97 (0.87-1.08) | 0.55  |
| HMDB00705  | C6 carnitine                       | 0.97 (0.87-1.08) | 0.571 | 0.99 (0.89-1.11) | 0.921 |

|            |                           |                  |       |                  |       |
|------------|---------------------------|------------------|-------|------------------|-------|
| HMDB13331  | C14:2 carnitine           | 0.97 (0.88-1.07) | 0.574 | 0.99 (0.89-1.09) | 0.797 |
| HMDB07874* | C32:2 PC                  | 0.97 (0.88-1.07) | 0.581 | 0.98 (0.88-1.09) | 0.7   |
| HMDB05015  | gabapentin                | 1.06 (0.86-1.32) | 0.582 | 1.01 (0.81-1.27) | 0.918 |
| NA         | C16:1 SM                  | 0.97 (0.87-1.08) | 0.586 | 1.02 (0.91-1.15) | 0.7   |
| HMDB00696  | methionine                | 1.03 (0.93-1.14) | 0.594 | 1.01 (0.91-1.13) | 0.807 |
| HMDB00991* | 2-aminooctanoic acid      | 0.97 (0.86-1.09) | 0.604 | 0.97 (0.86-1.09) | 0.597 |
| HMDB00898  | 1-methylhistamine         | 1.03 (0.93-1.13) | 0.604 | 1.01 (0.91-1.12) | 0.894 |
| HMDB09102* | C38:6 PE                  | 1.03 (0.92-1.15) | 0.615 | 1.02 (0.91-1.14) | 0.752 |
| HMDB02064  | N-acetylputrescine        | 0.98 (0.88-1.08) | 0.649 | 0.98 (0.88-1.09) | 0.708 |
| HMDB11512* | C20:1 LPE                 | 0.98 (0.88-1.08) | 0.651 | 0.97 (0.87-1.08) | 0.584 |
| HMDB00904  | citrulline                | 1.02 (0.92-1.14) | 0.652 | 1.02 (0.92-1.14) | 0.668 |
| HMDB03681  | 4-acetamidobutanoate      | 0.98 (0.88-1.08) | 0.654 | 0.97 (0.87-1.08) | 0.573 |
| HMDB11343* | C34:3 PE plasmalogen      | 1.02 (0.93-1.13) | 0.658 | 1.01 (0.92-1.12) | 0.786 |
| HMDB09012* | C40:6 PE                  | 0.98 (0.88-1.09) | 0.659 | 0.99 (0.88-1.11) | 0.827 |
| NA         | C20:4 carnitine           | 1.02 (0.92-1.14) | 0.671 | 1.04 (0.93-1.16) | 0.5   |
| HMDB02250  | C12 carnitine             | 0.98 (0.89-1.08) | 0.672 | 1 (0.9-1.11)     | 0.982 |
| NA         | C36:3 DAG_or_TAG_fragment | 0.98 (0.89-1.08) | 0.673 | 1.05 (0.94-1.17) | 0.417 |
| HMDB00162  | proline                   | 1.02 (0.93-1.13) | 0.674 | 1.03 (0.93-1.14) | 0.622 |
| HMDB00161  | alanine                   | 0.98 (0.88-1.09) | 0.682 | 1 (0.9-1.12)     | 0.952 |
| NA         | hydroxyectoine            | 1.02 (0.92-1.13) | 0.684 | 1.02 (0.92-1.14) | 0.692 |
| HMDB00123  | glycine                   | 1.02 (0.92-1.13) | 0.687 | 1.01 (0.91-1.13) | 0.846 |
| HMDB10387* | C18:3 LPC                 | 0.98 (0.88-1.09) | 0.695 | 0.97 (0.87-1.09) | 0.628 |
| HMDB00688  | C5 carnitine              | 0.98 (0.89-1.08) | 0.695 | 1.01 (0.91-1.13) | 0.833 |
| HMDB00063  | cortisol                  | 0.98 (0.88-1.09) | 0.696 | 0.97 (0.87-1.08) | 0.572 |
| HMDB00897  | 7-methylguanine           | 0.98 (0.88-1.09) | 0.703 | 0.97 (0.87-1.08) | 0.602 |
| HMDB00630* | cytosine_isomer           | 1.02 (0.92-1.13) | 0.704 | 1 (0.89-1.11)    | 0.964 |
| HMDB13130  | C5-DC carnitine           | 0.98 (0.89-1.09) | 0.709 | 0.98 (0.88-1.09) | 0.72  |
| NA         | C38:5 DAG_or_TAG_fragment | 0.98 (0.88-1.09) | 0.713 | 1.03 (0.92-1.15) | 0.629 |
| HMDB00719  | homoserine                | 1.02 (0.91-1.15) | 0.72  | 1.03 (0.91-1.17) | 0.609 |
| HMDB03334  | SDMA                      | 0.98 (0.87-1.1)  | 0.721 | 0.96 (0.85-1.08) | 0.484 |
| HMDB03282  | 1-methylguanine           | 1.02 (0.92-1.13) | 0.727 | 1.03 (0.92-1.14) | 0.637 |
| HMDB00679  | homocitrulline            | 1.02 (0.92-1.13) | 0.733 | 1.02 (0.91-1.14) | 0.782 |
| HMDB11478* | C18:3 LPE                 | 1.02 (0.92-1.13) | 0.745 | 1 (0.9-1.11)     | 0.957 |
| HMDB07869* | C30:0 PC                  | 0.98 (0.89-1.09) | 0.749 | 0.96 (0.87-1.07) | 0.486 |

|                   |                           |                  |       |                  |       |
|-------------------|---------------------------|------------------|-------|------------------|-------|
| NA                | ectoine                   | 0.98 (0.89-1.08) | 0.75  | 0.97 (0.88-1.07) | 0.558 |
| HMDB12097         | C14:0 SM                  | 0.98 (0.89-1.09) | 0.753 | 0.99 (0.89-1.1)  | 0.885 |
| HMDB00112         | GABA                      | 1.02 (0.92-1.13) | 0.754 | 1.03 (0.92-1.15) | 0.586 |
| HMDB00167         | threonine                 | 1.02 (0.91-1.14) | 0.768 | 1.03 (0.91-1.16) | 0.652 |
| HMDB02014         | C14:1 carnitine           | 0.99 (0.89-1.09) | 0.774 | 1 (0.9-1.11)     | 0.981 |
| HMDB10403         | C22:5 LPC                 | 0.99 (0.89-1.09) | 0.779 | 0.96 (0.86-1.07) | 0.449 |
| HMDB00201         | C2 carnitine              | 1.01 (0.92-1.12) | 0.782 | 1.04 (0.93-1.15) | 0.485 |
| NA                | C36:3 PS plasmalogen      | 0.99 (0.9-1.08)  | 0.784 | 0.99 (0.89-1.09) | 0.819 |
| NA                | N-methylproline           | 1.01 (0.92-1.12) | 0.786 | 1 (0.91-1.11)    | 0.935 |
| HMDB13238         | C7 carnitine              | 1.01 (0.92-1.12) | 0.796 | 1.03 (0.92-1.14) | 0.623 |
| HMDB08928*        | C34:2 PE                  | 0.99 (0.89-1.09) | 0.822 | 1.01 (0.9-1.12)  | 0.926 |
| HMDB00716         | pipecolic acid            | 1.01 (0.91-1.12) | 0.824 | 1.02 (0.91-1.14) | 0.788 |
| HMDB00182         | lysine                    | 0.99 (0.88-1.11) | 0.828 | 1.02 (0.9-1.15)  | 0.777 |
| Internal Standard | phenylalanine-d8          | 1.01 (0.9-1.14)  | 0.829 | 0.99 (0.88-1.12) | 0.889 |
| HMDB04827         | proline betaine           | 0.99 (0.9-1.09)  | 0.836 | 0.97 (0.87-1.07) | 0.512 |
| HMDB01476         | 3-hydroxyanthranilic acid | 1.01 (0.91-1.12) | 0.836 | 1.02 (0.92-1.14) | 0.676 |
| HMDB09003*        | C38:4 PE                  | 0.99 (0.9-1.09)  | 0.842 | 1.02 (0.92-1.14) | 0.678 |
| HMDB00026         | N-carbamoyl-beta-alanine  | 0.99 (0.89-1.1)  | 0.843 | 0.97 (0.87-1.08) | 0.537 |
| HMDB04953*        | C24:1 Ceramide (d18:1)    | 0.99 (0.89-1.1)  | 0.848 | 1 (0.9-1.12)     | 0.931 |
| HMDB12102         | C20:0 SM                  | 1.01 (0.91-1.12) | 0.859 | 1.03 (0.92-1.15) | 0.653 |
| HMDB08937*        | C36:4 PE                  | 1.01 (0.91-1.12) | 0.863 | 1.02 (0.91-1.14) | 0.775 |
| HMDB13631         | oleoyl glycine            | 0.99 (0.9-1.1)   | 0.865 | 1 (0.9-1.11)     | 0.984 |
| HMDB10379         | C14:0 LPC                 | 0.99 (0.9-1.09)  | 0.869 | 1 (0.9-1.11)     | 0.97  |
| HMDB00853         | acetyl-galactosamine      | 1.01 (0.9-1.13)  | 0.871 | 1.04 (0.92-1.17) | 0.523 |
| HMDB00641         | glutamine                 | 1.01 (0.91-1.12) | 0.872 | 0.97 (0.87-1.08) | 0.588 |
| HMDB00699         | 1-methylnicotinamide      | 0.99 (0.9-1.1)   | 0.886 | 0.97 (0.87-1.09) | 0.635 |
| HMDB08994*        | C36:2 PE                  | 0.99 (0.9-1.1)   | 0.893 | 1.02 (0.91-1.13) | 0.77  |
| NA                | C36:4 DAG_or_TAG_fragment | 0.99 (0.9-1.09)  | 0.894 | 1.05 (0.95-1.17) | 0.352 |
| HMDB00177         | histidine                 | 1.01 (0.9-1.12)  | 0.9   | 1.02 (0.9-1.14)  | 0.799 |
| HMDB02366         | C5:1 carnitine            | 0.99 (0.9-1.1)   | 0.904 | 0.98 (0.88-1.09) | 0.726 |
| NA                | glutamic acid amide       | 1.01 (0.91-1.12) | 0.913 | 0.97 (0.87-1.08) | 0.551 |
| HMDB13288         | C9 carnitine              | 0.99 (0.9-1.1)   | 0.918 | 1 (0.9-1.1)      | 0.925 |
| HMDB00725         | hydroxyproline            | 1 (0.91-1.11)    | 0.92  | 1.01 (0.91-1.12) | 0.838 |
| NA                | C34:1 DAG_or_TAG_fragment | 1 (0.9-1.1)      | 0.923 | 1.06 (0.95-1.18) | 0.309 |

|                   |                           |                 |       |                  |       |
|-------------------|---------------------------|-----------------|-------|------------------|-------|
| Internal Standard | valine-d8                 | 1.01 (0.9-1.13) | 0.928 | 1 (0.89-1.12)    | 0.965 |
| HMDB00929         | tryptophan                | 1 (0.9-1.1)     | 0.93  | 0.99 (0.89-1.1)  | 0.792 |
| HMDB08925*        | C34:0 PE                  | 1 (0.91-1.1)    | 0.937 | 0.99 (0.9-1.1)   | 0.885 |
| HMDB00875         | trigonelline              | 1 (0.91-1.11)   | 0.948 | 0.99 (0.89-1.1)  | 0.861 |
| HMDB07973*        | C34:2 PC                  | 1 (0.9-1.11)    | 0.961 | 1 (0.89-1.12)    | 0.994 |
| HMDB00158         | tyrosine                  | 1 (0.9-1.11)    | 0.962 | 1.01 (0.91-1.13) | 0.796 |
| HMDB12103         | C22:0 SM                  | 1 (0.89-1.12)   | 0.966 | 1.02 (0.9-1.16)  | 0.735 |
| HMDB00062         | carnitine                 | 1 (0.9-1.11)    | 0.97  | 1.01 (0.91-1.12) | 0.87  |
| HMDB32055         | N-acetylhistidine         | 1 (0.9-1.11)    | 0.979 | 0.99 (0.89-1.11) | 0.919 |
| HMDB00462         | allantoin                 | 1 (0.9-1.12)    | 0.981 | 1.04 (0.93-1.17) | 0.461 |
| HMDB05862         | 2-methylguanosine         | 1 (0.9-1.12)    | 0.982 | 1.02 (0.91-1.14) | 0.767 |
| NA                | C34:2 DAG_or_TAG_fragment | 1 (0.91-1.1)    | 0.989 | 1.05 (0.94-1.16) | 0.382 |

**Supplemental Table 3. : Odds ratios (OR) of breast cancer and 95% confidence intervals (CI) per 1 SD increase for all metabolites, by ER status.**

Simple model: adjusts for matching factors including menopause status at blood draw, time of blood draw, date/season of blood draw, luteal day at blood draw, fasting status at blood draw, menopausal status at diagnosis and race.

Adjusted model: in addition to matching factors, this model adjusts for BMI at age 18, weight change between age 18 and time of blood draw, age at menarche, parity and age at first birth, family history of breast cancer, personal history of benign breast disease, physical activity, alcohol consumption, exogenous hormone use, breast feeding history.

| Simple Model      |                           |                  |       |                  |       |       | Adjusted Model    |                           |                  |       |                  |       |       |
|-------------------|---------------------------|------------------|-------|------------------|-------|-------|-------------------|---------------------------|------------------|-------|------------------|-------|-------|
| HMDB_ID           | METABOLITE                | ER positive      |       | ER negative      |       | p.het | HMDB_ID           | METABOLITE                | ER positive      |       | ER negative      |       | p.het |
|                   |                           | OR (95% CI)      | PVAL  | OR (95% CI)      | PVAL  |       |                   |                           | OR (95% CI)      | PVAL  |                  |       |       |
| HMDB00043         | betaine                   | 1.06 (0.95-1.18) | 0.309 | 0.89 (0.73-1.08) | 0.241 | 0.039 | HMDB00043         | betaine                   | 1.07 (0.96-1.2)  | 0.22  | 0.89 (0.73-1.09) | 0.253 | 0.016 |
| HMDB00168         | asparagine                | 1.08 (0.97-1.2)  | 0.177 | 1.25 (1.03-1.52) | 0.023 | 0.024 | HMDB00168         | asparagine                | 1.06 (0.94-1.18) | 0.346 | 1.21 (0.99-1.47) | 0.063 | 0.027 |
| HMDB03681         | 4-acetamidobutanoate      | 0.98 (0.88-1.09) | 0.701 | 0.88 (0.72-1.07) | 0.214 | 0.067 | HMDB03681         | 4-acetamidobutanoate      | 0.97 (0.87-1.08) | 0.558 | 0.89 (0.72-1.09) | 0.257 | 0.031 |
| HMDB00177         | histidine                 | 1.01 (0.91-1.13) | 0.793 | 1.05 (0.86-1.28) | 0.62  | 0.039 | HMDB00177         | histidine                 | 1.01 (0.91-1.13) | 0.858 | 1.06 (0.87-1.29) | 0.591 | 0.047 |
| HMDB00187         | serine                    | 1.01 (0.91-1.12) | 0.845 | 1.13 (0.94-1.36) | 0.212 | 0.023 | HMDB00187         | serine                    | 1.02 (0.92-1.13) | 0.712 | 1.1 (0.91-1.33)  | 0.337 | 0.059 |
| HMDB00133         | guanosine                 | 1.04 (0.93-1.16) | 0.487 | 0.92 (0.79-1.09) | 0.302 | 0.05  | HMDB00133         | guanosine                 | 1.04 (0.94-1.16) | 0.464 | 0.94 (0.8-1.11)  | 0.439 | 0.061 |
| HMDB01414         | putrescine                | 1.09 (0.99-1.22) | 0.092 | 1 (0.84-1.21)    | 0.999 | 0.061 | HMDB01414         | putrescine                | 1.08 (0.97-1.2)  | 0.175 | 1.01 (0.85-1.23) | 0.91  | 0.094 |
| HMDB00167         | threonine                 | 1 (0.89-1.13)    | 0.966 | 1.11 (0.9-1.38)  | 0.325 | 0.111 | HMDB00167         | threonine                 | 1 (0.88-1.12)    | 0.938 | 1.12 (0.9-1.39)  | 0.312 | 0.097 |
| HMDB13325         | C10:2 carnitine           | 0.96 (0.87-1.07) | 0.501 | 0.88 (0.74-1.06) | 0.174 | 0.173 | HMDB13325         | C10:2 carnitine           | 0.97 (0.87-1.08) | 0.591 | 0.9 (0.76-1.08)  | 0.254 | 0.097 |
| Internal Standard | phenylalanine-d8          | 1.03 (0.94-1.15) | 0.533 | 1.08 (0.9-1.35)  | 0.455 | 0.153 | Internal Standard | phenylalanine-d8          | 1.03 (0.94-1.15) | 0.511 | 1.09 (0.91-1.36) | 0.407 | 0.099 |
| HMDB00719         | homoserine                | 1 (0.89-1.13)    | 0.965 | 1.13 (0.91-1.4)  | 0.282 | 0.113 | HMDB00719         | homoserine                | 1 (0.88-1.12)    | 0.947 | 1.13 (0.91-1.41) | 0.265 | 0.099 |
| HMDB00875         | trigonelline              | 0.95 (0.86-1.06) | 0.382 | 0.92 (0.76-1.11) | 0.375 | 0.185 | HMDB00875         | trigonelline              | 0.94 (0.84-1.05) | 0.259 | 0.89 (0.73-1.08) | 0.222 | 0.102 |
| HMDB02172         | N1,N12-diacetylspermine   | 0.99 (0.89-1.1)  | 0.836 | 1.22 (1.02-1.46) | 0.029 | 0.074 | HMDB02172         | N1,N12-diacetylspermine   | 1 (0.9-1.12)     | 0.961 | 1.27 (1.05-1.52) | 0.01  | 0.111 |
| HMDB15168         | cerulenin                 | 0.99 (0.9-1.1)   | 0.899 | 0.95 (0.8-1.14)  | 0.567 | 0.187 | HMDB15168         | cerulenin                 | 0.99 (0.89-1.1)  | 0.822 | 0.96 (0.8-1.16)  | 0.676 | 0.119 |
| HMDB00898         | 1-methylhistamine         | 1.08 (0.97-1.19) | 0.144 | 0.92 (0.77-1.11) | 0.39  | 0.197 | HMDB00898         | 1-methylhistamine         | 1.07 (0.96-1.18) | 0.222 | 0.93 (0.77-1.12) | 0.44  | 0.12  |
| HMDB03282         | 1-methylguanane           | 1.02 (0.92-1.13) | 0.687 | 0.9 (0.76-1.07)  | 0.235 | 0.179 | HMDB03282         | 1-methylguanane           | 1.03 (0.93-1.14) | 0.598 | 0.92 (0.77-1.1)  | 0.354 | 0.12  |
| HMDB00210         | pantothenate              | 1.06 (0.95-1.17) | 0.279 | 1.14 (0.94-1.37) | 0.171 | 0.159 | HMDB00210         | pantothenate              | 1.05 (0.94-1.17) | 0.386 | 1.16 (0.96-1.41) | 0.117 | 0.123 |
| HMDB12103         | C22:0 SM                  | 1.01 (0.91-1.12) | 0.905 | 0.98 (0.81-1.18) | 0.797 | 0.164 | HMDB12103         | C22:0 SM                  | 1.02 (0.92-1.14) | 0.719 | 1 (0.83-1.22)    | 0.979 | 0.126 |
| NA                | 2-aminohippuric acid      | 0.9 (0.81-0.99)  | 0.041 | 0.79 (0.65-0.96) | 0.016 | 0.141 | NA                | 2-aminohippuric acid      | 0.9 (0.81-1)     | 0.05  | 0.82 (0.67-1)    | 0.046 | 0.127 |
| HMDB11441*        | C36:3 PE plasmalogen      | 1.03 (0.93-1.14) | 0.542 | 1.09 (0.91-1.32) | 0.358 | 0.149 | HMDB11441*        | C36:3 PE plasmalogen      | 1.03 (0.92-1.14) | 0.629 | 1.07 (0.88-1.3)  | 0.52  | 0.13  |
| HMDB13288         | C9 carnitine              | 1.05 (0.94-1.16) | 0.376 | 0.89 (0.73-1.07) | 0.207 | 0.155 | HMDB13288         | C9 carnitine              | 1.03 (0.93-1.15) | 0.531 | 0.88 (0.73-1.07) | 0.204 | 0.132 |
| HMDB04949         | C16:0 Ceramide (d18:1)    | 1.01 (0.91-1.12) | 0.852 | 1.03 (0.87-1.26) | 0.787 | 0.147 | HMDB04949         | C16:0 Ceramide (d18:1)    | 1.01 (0.91-1.12) | 0.896 | 1.06 (0.89-1.31) | 0.584 | 0.144 |
| HMDB11343*        | C34:3 PE plasmalogen      | 1.01 (0.92-1.12) | 0.787 | 1.01 (0.84-1.22) | 0.92  | 0.199 | HMDB11343*        | C34:3 PE plasmalogen      | 1 (0.9-1.11)     | 0.948 | 0.99 (0.82-1.2)  | 0.954 | 0.148 |
| HMDB01476         | 3-hydroxyanthranilic acid | 0.97 (0.88-1.08) | 0.616 | 1.05 (0.88-1.28) | 0.579 | 0.183 | HMDB01476         | 3-hydroxyanthranilic acid | 0.96 (0.87-1.06) | 0.428 | 1.05 (0.88-1.28) | 0.581 | 0.149 |
| HMDB00182         | lysine                    | 0.98 (0.87-1.1)  | 0.731 | 0.98 (0.79-1.2)  | 0.823 | 0.137 | HMDB00182         | lysine                    | 0.99 (0.88-1.11) | 0.838 | 1.02 (0.83-1.27) | 0.841 | 0.156 |
| HMDB11745         | N-acetylmethionine        | 1.06 (0.96-1.18) | 0.242 | 1.12 (0.93-1.35) | 0.25  | 0.164 | HMDB11745         | N-acetylmethionine        | 1.06 (0.96-1.18) | 0.251 | 1.11 (0.92-1.34) | 0.276 | 0.167 |
| HMDB01348         | C18:0 SM                  | 1.03 (0.93-1.15) | 0.555 | 0.96 (0.8-1.15)  | 0.654 | 0.27  | HMDB01348         | C18:0 SM                  | 1.05 (0.94-1.17) | 0.407 | 1 (0.83-1.21)    | 0.978 | 0.167 |
| HMDB11211*        | C34:3 PC plasmalogen      | 1.09 (0.98-1.21) | 0.097 | 1.06 (0.88-1.28) | 0.562 | 0.189 | HMDB11211*        | C34:3 PC plasmalogen      | 1.07 (0.96-1.2)  | 0.232 | 0.99 (0.81-1.21) | 0.909 | 0.167 |
| HMDB00897         | 7-methylguanane           | 0.98 (0.89-1.09) | 0.723 | 0.9 (0.75-1.09)  | 0.288 | 0.366 | HMDB00897         | 7-methylguanane           | 0.97 (0.88-1.08) | 0.609 | 0.91 (0.75-1.09) | 0.293 | 0.192 |
| HMDB00696         | methionine                | 1 (0.9-1.11)     | 0.985 | 1.15 (0.95-1.38) | 0.145 | 0.148 | HMDB00696         | methionine                | 0.99 (0.89-1.1)  | 0.801 | 1.15 (0.95-1.38) | 0.141 | 0.193 |
| HMDB00925         | trimethylamine-N-oxide    | 1.01 (0.91-1.11) | 0.918 | 0.94 (0.78-1.14) | 0.556 | 0.212 | HMDB00925         | trimethylamine-N-oxide    | 1.02 (0.92-1.13) | 0.715 | 0.95 (0.79-1.15) | 0.626 | 0.193 |
| HMDB11253*        | C38:5 PE plasmalogen      | 0.99 (0.9-1.1)   | 0.888 | 0.98 (0.82-1.18) | 0.828 | 0.364 | HMDB11253*        | C38:5 PE plasmalogen      | 1.01 (0.91-1.12) | 0.837 | 1 (0.83-1.2)     | 0.959 | 0.201 |
| HMDB00159         | phenylalanine             | 0.99 (0.89-1.1)  | 0.86  | 1.08 (0.89-1.29) | 0.434 | 0.172 | HMDB00159         | phenylalanine             | 1 (0.9-1.11)     | 0.996 | 1.13 (0.93-1.37) | 0.208 | 0.209 |
| HMDB00064         | creatine                  | 1.06 (0.95-1.19) | 0.271 | 1.21 (0.99-1.49) | 0.06  | 0.212 | HMDB00064         | creatine                  | 1.07 (0.96-1.2)  | 0.208 | 1.26 (1.03-1.55) | 0.03  | 0.21  |
| HMDB12102         | C20:0 SM                  | 1.01 (0.91-1.12) | 0.848 | 0.99 (0.81-1.2)  | 0.899 | 0.241 | HMDB12102         | C20:0 SM                  | 1.01 (0.91-1.13) | 0.856 | 1.01 (0.83-1.24) | 0.896 | 0.214 |
| HMDB11410*        | C36:5 PE plasmalogen      | 1.01 (0.91-1.12) | 0.863 | 0.97 (0.8-1.17)  | 0.729 | 0.382 | HMDB11410*        | C36:5 PE plasmalogen      | 1.01 (0.91-1.13) | 0.783 | 0.98 (0.81-1.19) | 0.866 | 0.232 |
| HMDB00248         | thyroxine                 | 0.98 (0.88-1.09) | 0.7   | 1.04 (0.86-1.29) | 0.672 | 0.154 | HMDB00248         | thyroxine                 | 1 (0.89-1.11)    | 0.953 | 1.08 (0.88-1.34) | 0.473 | 0.238 |
| HMDB13326         | C12:1 carnitine           | 1.02 (0.92-1.14) | 0.726 | 0.87 (0.72-1.06) | 0.161 | 0.253 | HMDB13326         | C12:1 carnitine           | 1.03 (0.92-1.15) | 0.632 | 0.89 (0.73-1.08) | 0.229 | 0.252 |
| HMDB32390         | 2-methyl-4,5-benzoxazole  | 0.9 (0.81-0.99)  | 0.035 | 1 (0.84-1.22)    | 0.968 | 0.168 | HMDB32390         | 2-methyl-4,5-benzoxazole  | 0.9 (0.81-1)     | 0.044 | 1.01 (0.84-1.23) | 0.921 | 0.255 |
| HMDB01855         | 5-hydroxytryptophol       | 1.13 (1.02-1.26) | 0.018 | 0.99 (0.82-1.21) | 0.919 | 0.294 | HMDB01855         | 5-hydroxytryptophol       | 1.11 (1-1.24)    | 0.059 | 0.97 (0.8-1.18)  | 0.741 | 0.26  |
| HMDB00904         | citrulline                | 0.98 (0.88-1.09) | 0.712 | 1.08 (0.89-1.31) | 0.436 | 0.388 | HMDB00904         | citrulline                | 0.98 (0.88-1.09) | 0.661 | 1.06 (0.88-1.29) | 0.538 | 0.273 |
| HMDB01539         | ADMA                      | 0.96 (0.86-1.06) | 0.418 | 0.96 (0.8-1.16)  | 0.685 | 0.242 | HMDB01539         | ADMA                      | 0.96 (0.87-1.07) | 0.455 | 0.98 (0.81-1.19) | 0.864 | 0.282 |
| NA                | C36:2 DAG_or_TAG_fragment | 0.96 (0.86-1.06) | 0.419 | 0.93 (0.77-1.13) | 0.475 | 0.36  | NA                | C36:2 DAG_or_TAG_fragment | 0.98 (0.88-1.1)  | 0.766 | 1 (0.82-1.22)    | 0.997 | 0.295 |
| HMDB02064         | N-acetylputrescine        | 1 (0.9-1.11)     | 0.939 | 0.98 (0.81-1.19) | 0.818 | 0.313 | HMDB02064         | N-acetylputrescine        | 0.98 (0.88-1.1)  | 0.778 | 0.99 (0.81-1.21) | 0.946 | 0.3   |
| HMDB00161         | alanine                   | 0.97 (0.87-1.08) | 0.591 | 1.05 (0.86-1.28) | 0.658 | 0.22  | HMDB00161         | alanine                   | 0.99 (0.88-1.11) | 0.81  | 1.1 (0.9-1.36)   | 0.348 | 0.306 |
| HMDB13130         | C5-DC carnitine           | 0.97 (0.87-1.07) | 0.529 | 1.04 (0.86-1.26) | 0.682 | 0.458 | HMDB13130         | C5-DC carnitine           | 0.96 (0.86-1.07) | 0.466 | 1.05 (0.86-1.27) | 0.653 | 0.309 |
| HMDB05015         | gabapentin                | 1.05 (0.95-1.16) | 0.388 | 0.93 (0.76-1.14) | 0.512 | 0.239 | HMDB05015         | gabapentin                | 1.04 (0.94-1.16) | 0.421 | 0.94 (0.76-1.15) | 0.547 | 0.309 |
| HMDB09003*        | C38:4 PE                  | 0.94 (0.84-1.05) | 0.289 | 0.93 (0.76-1.14) | 0.492 | 0.378 | HMDB09003*        | C38:4 PE                  | 0.96 (0.85-1.07) | 0.456 | 0.98 (0.79-1.21) | 0.835 | 0.311 |
| HMDB00001         | 1-methylhistidine         | 0.94 (0.85-1.05) | 0.278 | 1.1 (0.91-1.33)  | 0.299 | 0.384 | HMDB00001         | 1-methylhistidine         | 0.93 (0.84-1.04) | 0.195 | 1.11 (0.91-1.33) | 0.301 | 0.313 |
| NA                | hydroxyectoine            | 0.99 (0.89-1.1)  | 0.846 | 1.06 (0.88-1.28) | 0.552 | 0.459 | NA                | hydroxyectoine            | 0.99 (0.89-1.1)  | 0.801 | 1.04 (0.86-1.27) | 0.671 | 0.322 |
| HMDB00112         | GABA                      | 1.02 (0.91-1.13) | 0.75  | 1.11 (0.92-1.35) | 0.286 | 0.206 | HMDB00112         | GABA                      | 1.03 (0.92-1.15) | 0.581 | 1.15 (0.95-1.41) | 0.16  | 0.322 |

|             |                                 |                  |       |                  |       |       |             |                                |                  |       |                  |       |       |
|-------------|---------------------------------|------------------|-------|------------------|-------|-------|-------------|--------------------------------|------------------|-------|------------------|-------|-------|
| HMDB08952*  | C34:2 PE plasmalogen            | 1.03 (0.93-1.14) | 0.53  | 1.01 (0.84-1.21) | 0.949 | 0.436 | HMDB08952*  | C34:2 PE plasmalogen           | 1.02 (0.92-1.13) | 0.703 | 0.98 (0.82-1.19) | 0.856 | 0.334 |
| HMDB02000   | myristoleic acid                | 0.95 (0.86-1.05) | 0.306 | 1.01 (0.84-1.23) | 0.892 | 0.59  | HMDB02000   | myristoleic acid               | 0.97 (0.88-1.08) | 0.601 | 1.04 (0.86-1.25) | 0.71  | 0.337 |
| HMDB01276   | N1-acetylspermidine             | 1.12 (1-1.24)    | 0.041 | 1.11 (0.91-1.34) | 0.295 | 0.706 | HMDB01276   | N1-acetylspermidine            | 1.13 (1.01-1.26) | 0.029 | 1.13 (0.93-1.36) | 0.217 | 0.349 |
| NA          | C36:3 DAG_or_TAG_fragment       | 0.99 (0.89-1.1)  | 0.865 | 0.96 (0.8-1.16)  | 0.702 | 0.572 | NA          | C36:3 DAG_or_TAG_fragment      | 1.03 (0.92-1.16) | 0.555 | 1.04 (0.85-1.27) | 0.733 | 0.352 |
| HMDB00462   | allantoin                       | 0.94 (0.84-1.04) | 0.243 | 0.94 (0.77-1.14) | 0.523 | 0.414 | HMDB00462   | allantoin                      | 0.96 (0.86-1.07) | 0.454 | 0.97 (0.79-1.19) | 0.765 | 0.355 |
| HMDB00631*  | glycodeoxycholate/glycochenode  | 0.99 (0.88-1.1)  | 0.813 | 0.99 (0.81-1.21) | 0.907 | 0.267 | HMDB00631*  | glycodeoxycholate/glycochenode | 1 (0.9-1.13)     | 0.935 | 1 (0.82-1.23)    | 0.966 | 0.356 |
| HMDB11220*  | C36:5 PC plasmalogen            | 1.01 (0.91-1.12) | 0.87  | 0.87 (0.72-1.05) | 0.152 | 0.484 | HMDB11220*  | C36:5 PC plasmalogen           | 1.01 (0.91-1.12) | 0.897 | 0.86 (0.71-1.04) | 0.127 | 0.357 |
| HMDB12097   | C14:0 SM                        | 0.96 (0.87-1.07) | 0.507 | 0.89 (0.73-1.07) | 0.212 | 0.391 | HMDB12097   | C14:0 SM                       | 0.95 (0.85-1.06) | 0.354 | 0.91 (0.75-1.11) | 0.358 | 0.361 |
| HMDB05862   | 2-methylguanosine               | 1.02 (0.92-1.13) | 0.707 | 1.09 (0.92-1.35) | 0.402 | 0.58  | HMDB05862   | 2-methylguanosine              | 1.02 (0.92-1.14) | 0.647 | 1.12 (0.94-1.4)  | 0.271 | 0.365 |
| HMDB13287   | N6,N6-dimethyllysine            | 0.95 (0.85-1.05) | 0.294 | 0.92 (0.76-1.12) | 0.41  | 0.543 | HMDB13287   | N6,N6-dimethyllysine           | 0.95 (0.85-1.05) | 0.315 | 0.93 (0.77-1.13) | 0.476 | 0.366 |
| HMDB11512*  | C20:1 LPE                       | 0.96 (0.86-1.06) | 0.41  | 1.09 (0.9-1.32)  | 0.381 | 0.39  | HMDB11512*  | C20:1 LPE                      | 0.94 (0.84-1.04) | 0.214 | 1.06 (0.88-1.29) | 0.551 | 0.37  |
| HMDB02172   | diacetylspermine                | 1 (0.9-1.11)     | 0.978 | 1.13 (0.94-1.36) | 0.205 | 0.258 | HMDB02172   | diacetylspermine               | 1.01 (0.91-1.12) | 0.856 | 1.17 (0.97-1.42) | 0.105 | 0.372 |
| HMDB00123   | glycine                         | 1.01 (0.91-1.12) | 0.824 | 1.12 (0.93-1.35) | 0.243 | 0.295 | HMDB00123   | glycine                        | 1.01 (0.91-1.12) | 0.884 | 1.06 (0.87-1.3)  | 0.541 | 0.372 |
| HMDB09102*  | C38:6 PE                        | 0.99 (0.88-1.11) | 0.854 | 0.98 (0.8-1.2)   | 0.859 | 0.47  | HMDB09102*  | C38:6 PE                       | 0.96 (0.86-1.08) | 0.541 | 0.98 (0.79-1.2)  | 0.828 | 0.374 |
| HMDB04620   | N-alpha-acetyarginine           | 0.96 (0.86-1.07) | 0.496 | 0.99 (0.82-1.21) | 0.947 | 0.313 | HMDB04620   | N-alpha-acetyarginine          | 0.97 (0.87-1.08) | 0.563 | 1 (0.83-1.22)    | 0.985 | 0.385 |
| HMDB01431   | pyridoxamine                    | 0.95 (0.85-1.07) | 0.402 | 0.94 (0.77-1.15) | 0.552 | 0.31  | HMDB01431   | pyridoxamine                   | 0.96 (0.85-1.08) | 0.485 | 0.98 (0.8-1.22)  | 0.881 | 0.396 |
| HMDB15150   | sulfamethoxazole                | 1.02 (0.93-1.13) | 0.655 | 1.12 (0.93-1.36) | 0.24  | 0.686 | HMDB15150   | sulfamethoxazole               | 1.02 (0.92-1.14) | 0.65  | 1.14 (0.94-1.39) | 0.204 | 0.396 |
| HMDB13678   | 4-hydroxyhippurate              | 1.02 (0.92-1.13) | 0.7   | 1.02 (0.84-1.23) | 0.878 | 0.281 | HMDB13678   | 4-hydroxyhippurate             | 1.02 (0.92-1.13) | 0.737 | 1.01 (0.83-1.23) | 0.893 | 0.401 |
| HMDB13631   | oleoyl glycine                  | 1.02 (0.91-1.13) | 0.778 | 1.04 (0.86-1.27) | 0.709 | 0.527 | HMDB13631   | oleoyl glycine                 | 1.01 (0.91-1.13) | 0.837 | 1.03 (0.85-1.26) | 0.802 | 0.407 |
| HMDB00715   | kynurenic acid                  | 0.91 (0.82-1.01) | 0.066 | 0.83 (0.69-1)    | 0.056 | 0.43  | HMDB00715   | kynurenic acid                 | 0.9 (0.81-1)     | 0.049 | 0.83 (0.69-1.01) | 0.067 | 0.409 |
| HMDB11756   | N-acetylleucine                 | 0.98 (0.89-1.09) | 0.768 | 1.02 (0.84-1.23) | 0.863 | 0.225 | HMDB11756   | N-acetylleucine                | 1 (0.9-1.11)     | 0.996 | 1.06 (0.87-1.28) | 0.584 | 0.414 |
| NA          | C36:3 PS plasmalogen            | 0.97 (0.87-1.07) | 0.516 | 1.07 (0.88-1.32) | 0.504 | 0.663 | NA          | C36:3 PS plasmalogen           | 0.96 (0.86-1.07) | 0.434 | 1.11 (0.91-1.39) | 0.321 | 0.416 |
| HMDB01008   | biliverdin                      | 1.06 (0.96-1.19) | 0.303 | 1.07 (0.88-1.37) | 0.559 | 0.275 | HMDB01008   | biliverdin                     | 1.06 (0.96-1.19) | 0.281 | 1.05 (0.88-1.33) | 0.663 | 0.421 |
| HMDB00929   | tryptophan                      | 1.03 (0.93-1.15) | 0.518 | 0.99 (0.83-1.21) | 0.953 | 0.422 | HMDB00929   | tryptophan                     | 1.03 (0.93-1.14) | 0.618 | 0.98 (0.82-1.2)  | 0.87  | 0.422 |
| HMDB04620   | N-alpha-acetylarginine          | 0.95 (0.85-1.06) | 0.357 | 0.97 (0.8-1.18)  | 0.768 | 0.369 | HMDB04620   | N-alpha-acetylarginine         | 0.96 (0.86-1.07) | 0.436 | 0.97 (0.8-1.19)  | 0.783 | 0.423 |
| HMDB02820   | methylimidazole acetic acid     | 0.96 (0.87-1.06) | 0.428 | 1.07 (0.89-1.3)  | 0.468 | 0.611 | HMDB02820   | methylimidazole acetic acid    | 0.95 (0.86-1.05) | 0.345 | 1.07 (0.89-1.3)  | 0.491 | 0.424 |
| NA          | N-methylproline                 | 0.96 (0.86-1.06) | 0.396 | 1.03 (0.85-1.24) | 0.778 | 0.277 | NA          | N-methylproline                | 0.96 (0.86-1.07) | 0.444 | 1.03 (0.85-1.24) | 0.776 | 0.428 |
| HMDB03357   | N-acetylornithine               | 0.98 (0.89-1.09) | 0.724 | 1 (0.83-1.21)    | 0.981 | 0.185 | HMDB03357   | N-acetylornithine              | 0.95 (0.86-1.06) | 0.358 | 0.98 (0.81-1.19) | 0.807 | 0.428 |
| HMDB32055   | N-acetylhistidine               | 0.97 (0.88-1.08) | 0.622 | 1.05 (0.87-1.27) | 0.635 | 0.511 | HMDB32055   | N-acetylhistidine              | 0.97 (0.87-1.07) | 0.524 | 1.03 (0.85-1.25) | 0.764 | 0.432 |
| HMDB09012*  | C40:6 PE                        | 0.94 (0.84-1.05) | 0.273 | 0.94 (0.77-1.15) | 0.571 | 0.499 | HMDB09012*  | C40:6 PE                       | 0.93 (0.83-1.05) | 0.237 | 0.98 (0.79-1.21) | 0.841 | 0.433 |
| HMDB02250   | C12 carnitine                   | 1.02 (0.91-1.13) | 0.78  | 0.9 (0.74-1.09)  | 0.273 | 0.477 | HMDB02250   | C12 carnitine                  | 1.02 (0.91-1.13) | 0.772 | 0.91 (0.75-1.1)  | 0.315 | 0.438 |
| HMDB11511   | C20:0 LPE                       | 1.05 (0.94-1.16) | 0.402 | 1.14 (0.94-1.39) | 0.176 | 0.276 | HMDB11511   | C20:0 LPE                      | 1.04 (0.93-1.16) | 0.506 | 1.11 (0.91-1.36) | 0.324 | 0.44  |
| HMDB00812   | N-acetylaspartic acid           | 1.03 (0.93-1.14) | 0.612 | 0.97 (0.79-1.17) | 0.745 | 0.521 | HMDB00812   | N-acetylaspartic acid          | 1.01 (0.91-1.12) | 0.843 | 0.93 (0.76-1.14) | 0.495 | 0.442 |
| HMDB04953*  | C24:1 Ceramide (d18:1)          | 0.99 (0.9-1.1)   | 0.907 | 1 (0.84-1.21)    | 0.983 | 0.357 | HMDB04953*  | C24:1 Ceramide (d18:1)         | 0.98 (0.89-1.09) | 0.743 | 1.01 (0.85-1.22) | 0.898 | 0.449 |
| HMDB03334   | SDMA                            | 1.03 (0.93-1.14) | 0.556 | 0.98 (0.81-1.18) | 0.801 | 0.528 | HMDB03334   | SDMA                           | 1.01 (0.91-1.12) | 0.808 | 0.97 (0.8-1.17)  | 0.718 | 0.451 |
| NA          | ectoine                         | 1 (0.9-1.11)     | 0.953 | 1.1 (0.91-1.33)  | 0.345 | 0.39  | NA          | ectoine                        | 0.99 (0.89-1.1)  | 0.847 | 1.1 (0.91-1.35)  | 0.319 | 0.453 |
| HMDB00206   | N6-acetyllysine                 | 0.96 (0.87-1.06) | 0.424 | 0.95 (0.78-1.15) | 0.587 | 0.478 | HMDB00206   | N6-acetyllysine                | 0.96 (0.86-1.06) | 0.399 | 0.96 (0.79-1.16) | 0.65  | 0.456 |
| NA          | C16:1 SM                        | 0.99 (0.89-1.1)  | 0.82  | 0.86 (0.72-1.04) | 0.109 | 0.534 | NA          | C16:1 SM                       | 1.01 (0.9-1.13)  | 0.928 | 0.91 (0.75-1.1)  | 0.325 | 0.459 |
| HMDB00128   | guanidinoacetic acid            | 1.07 (0.96-1.18) | 0.212 | 1 (0.83-1.21)    | 0.976 | 0.469 | HMDB00128   | guanidinoacetic acid           | 1.07 (0.96-1.19) | 0.232 | 0.95 (0.79-1.15) | 0.607 | 0.461 |
| HMDB00544   | 5-hydroxymethyl-4-methyluracil  | 0.92 (0.83-1.02) | 0.116 | 1.06 (0.87-1.28) | 0.574 | 0.703 | HMDB00544   | 5-hydroxymethyl-4-methyluracil | 0.92 (0.83-1.03) | 0.142 | 1.09 (0.9-1.33)  | 0.382 | 0.475 |
| NA          | C34:1 DAG_or_TAG_fragment       | 0.97 (0.88-1.08) | 0.602 | 1 (0.83-1.2)     | 0.975 | 0.902 | NA          | C34:1 DAG_or_TAG_fragment      | 1.01 (0.9-1.13)  | 0.864 | 1.06 (0.87-1.3)  | 0.537 | 0.479 |
| HMDB00824   | C3 carnitine                    | 0.92 (0.83-1.01) | 0.091 | 1.04 (0.86-1.25) | 0.711 | 0.365 | HMDB00824   | C3 carnitine                   | 0.93 (0.83-1.03) | 0.153 | 1.09 (0.9-1.32)  | 0.393 | 0.488 |
| HMDB02014   | C14:1 carnitine                 | 1.03 (0.92-1.14) | 0.63  | 0.93 (0.77-1.13) | 0.452 | 0.512 | HMDB02014   | C14:1 carnitine                | 1.03 (0.93-1.15) | 0.564 | 0.94 (0.78-1.14) | 0.543 | 0.506 |
| HMDB02366   | C5:1 carnitine                  | 0.99 (0.9-1.1)   | 0.92  | 1.01 (0.84-1.22) | 0.904 | 0.594 | HMDB02366   | C5:1 carnitine                 | 0.99 (0.89-1.09) | 0.778 | 1.02 (0.85-1.24) | 0.803 | 0.508 |
| HMDB00479   | methylhistidine                 | 0.95 (0.85-1.05) | 0.298 | 1.09 (0.9-1.31)  | 0.392 | 0.606 | HMDB00479   | methylhistidine                | 0.94 (0.84-1.04) | 0.225 | 1.09 (0.9-1.32)  | 0.378 | 0.509 |
| NA          | C34:2 DAG_or_TAG_fragment       | 0.98 (0.89-1.09) | 0.723 | 0.98 (0.82-1.19) | 0.864 | 0.694 | NA          | C34:2 DAG_or_TAG_fragment      | 1.01 (0.9-1.13)  | 0.885 | 1.05 (0.86-1.28) | 0.653 | 0.512 |
| HMDB01859   | acetaminophen                   | 0.93 (0.84-1.03) | 0.169 | 0.95 (0.77-1.14) | 0.578 | 0.756 | HMDB01859   | acetaminophen                  | 0.91 (0.82-1.01) | 0.081 | 0.93 (0.76-1.13) | 0.496 | 0.515 |
| HMDB00699   | 1-methylnicotinamide            | 1.05 (0.94-1.17) | 0.386 | 1.03 (0.84-1.26) | 0.775 | 0.493 | HMDB00699   | 1-methylnicotinamide           | 1.01 (0.91-1.13) | 0.81  | 1.01 (0.82-1.25) | 0.899 | 0.515 |
| HMDB13331   | C14:2 carnitine                 | 1.01 (0.91-1.13) | 0.802 | 0.91 (0.75-1.1)  | 0.33  | 0.635 | HMDB13331   | C14:2 carnitine                | 1.02 (0.92-1.14) | 0.694 | 0.92 (0.76-1.11) | 0.374 | 0.518 |
| HMDB08994*  | C36:2 PE                        | 0.93 (0.83-1.03) | 0.176 | 0.96 (0.79-1.17) | 0.699 | 0.657 | HMDB08994*  | C36:2 PE                       | 0.93 (0.83-1.04) | 0.221 | 1 (0.82-1.22)    | 0.989 | 0.522 |
| HMDB110407* | C16:1 LPC plasmalogen           | 1.05 (0.95-1.17) | 0.341 | 1.1 (0.91-1.32)  | 0.345 | 0.281 | HMDB110407* | C16:1 LPC plasmalogen          | 1.04 (0.94-1.16) | 0.442 | 1.07 (0.88-1.3)  | 0.501 | 0.523 |
| HMDB29416   | NMMA                            | 0.99 (0.89-1.11) | 0.878 | 0.92 (0.75-1.13) | 0.427 | 0.602 | HMDB29416   | NMMA                           | 1 (0.89-1.12)    | 0.999 | 0.96 (0.78-1.18) | 0.67  | 0.524 |
| HMDB00853   | N-acetylgalactosamine           | 1.05 (0.95-1.16) | 0.343 | 1.07 (0.89-1.29) | 0.462 | 0.486 | HMDB00853   | N-acetylgalactosamine          | 1.08 (0.97-1.2)  | 0.166 | 1.1 (0.91-1.34)  | 0.319 | 0.533 |
| NA          | glutamic acid amide             | 1.07 (0.97-1.2)  | 0.19  | 0.92 (0.76-1.13) | 0.421 | 0.415 | NA          | glutamic acid amide            | 1.06 (0.95-1.18) | 0.286 | 0.9 (0.74-1.09)  | 0.279 | 0.539 |
| HMDB00259   | serotonin                       | 1.01 (0.91-1.12) | 0.83  | 1.03 (0.86-1.25) | 0.742 | 0.953 | HMDB00259   | serotonin                      | 1.01 (0.91-1.11) | 0.922 | 1.01 (0.84-1.23) | 0.904 | 0.54  |
| HMDB00641   | glutamine                       | 1.08 (0.97-1.2)  | 0.182 | 0.93 (0.76-1.13) | 0.442 | 0.416 | HMDB00641   | glutamine                      | 1.06 (0.95-1.19) | 0.278 | 0.9 (0.74-1.1)   | 0.29  | 0.543 |
| NA          | DMGV                            | 0.86 (0.77-0.95) | 0.003 | 0.83 (0.69-1)    | 0.043 | 0.487 | NA          | DMGV                           | 0.86 (0.76-0.97) | 0.011 | 0.89 (0.72-1.1)  | 0.261 | 0.547 |
| HMDB04193   | N1-methyl-2-pyridone-5-carboxal | 0.97 (0.87-1.07) | 0.533 | 1.05 (0.87-1.27) | 0.586 | 0.411 | HMDB04193   | N1-methyl-2-pyridone-5-carbo   | 0.96 (0.86-1.07) | 0.431 | 1.08 (0.89-1.31) | 0.43  | 0.558 |
| HMDB06347   | C26 carnitine                   | 1.06 (0.96-1.18) | 0.256 | 0.97 (0.81-1.16) | 0.702 | 0.771 | HMDB06347   | C26 carnitine                  | 1.07 (0.96-1.19) | 0.202 | 0.97 (0.81-1.17) | 0.772 | 0.558 |



|            |                             |                  |       |                  |       |       |            |                             |                  |       |                  |       |       |
|------------|-----------------------------|------------------|-------|------------------|-------|-------|------------|-----------------------------|------------------|-------|------------------|-------|-------|
| HMDB08937* | C36:4 PE                    | 0.93 (0.83-1.04) | 0.22  | 0.96 (0.78-1.18) | 0.677 | 0.699 | HMDB08937* | C36:4 PE                    | 0.92 (0.82-1.04) | 0.17  | 0.97 (0.79-1.2)  | 0.788 | 0.563 |
| NA         | C36:2 PS plasmalogen        | 1.06 (0.95-1.17) | 0.288 | 1.05 (0.87-1.26) | 0.627 | 0.515 | NA         | C36:2 PS plasmalogen        | 1.06 (0.96-1.18) | 0.265 | 1.07 (0.89-1.29) | 0.482 | 0.575 |
| HMDB00687  | leucine                     | 0.94 (0.85-1.04) | 0.262 | 0.95 (0.79-1.15) | 0.604 | 0.511 | HMDB00687  | leucine                     | 0.96 (0.86-1.07) | 0.491 | 1.01 (0.83-1.24) | 0.902 | 0.578 |
| NA         | C38:5 DAG_or_TAG_fragment   | 0.95 (0.86-1.06) | 0.404 | 0.9 (0.74-1.1)   | 0.322 | 0.631 | NA         | C38:5 DAG_or_TAG_fragment   | 0.97 (0.87-1.09) | 0.662 | 0.96 (0.78-1.19) | 0.738 | 0.579 |
| HMDB34169  | methyl N-methylanthranilate | 1.03 (0.93-1.14) | 0.601 | 1.02 (0.85-1.24) | 0.795 | 0.525 | HMDB34169  | methyl N-methylanthranilate | 1.02 (0.92-1.14) | 0.674 | 1.01 (0.84-1.22) | 0.877 | 0.581 |
| NA         | C36:4 DAG_or_TAG_fragment   | 1 (0.9-1.1)      | 0.93  | 1 (0.83-1.21)    | 0.992 | 0.95  | NA         | C36:4 DAG_or_TAG_fragment   | 1.04 (0.93-1.16) | 0.539 | 1.06 (0.87-1.3)  | 0.54  | 0.581 |
| HMDB00853  | acetyl-galactosamine        | 1.01 (0.91-1.12) | 0.834 | 1.08 (0.9-1.31)  | 0.399 | 0.673 | HMDB00853  | acetyl-galactosamine        | 1.02 (0.92-1.14) | 0.657 | 1.11 (0.91-1.34) | 0.297 | 0.587 |
| HMDB00201  | C2 carnitine                | 0.95 (0.85-1.05) | 0.335 | 1.1 (0.91-1.34)  | 0.311 | 0.636 | HMDB00201  | C2 carnitine                | 0.96 (0.86-1.07) | 0.477 | 1.14 (0.94-1.38) | 0.176 | 0.587 |
| HMDB00651  | C10 carnitine               | 1.01 (0.9-1.12)  | 0.878 | 0.88 (0.73-1.08) | 0.219 | 0.483 | HMDB00651  | C10 carnitine               | 1.01 (0.9-1.12)  | 0.928 | 0.89 (0.73-1.08) | 0.244 | 0.589 |
| HMDB07874* | C32:2 PC                    | 0.96 (0.86-1.07) | 0.447 | 1.01 (0.84-1.22) | 0.93  | 0.742 | HMDB07874* | C32:2 PC                    | 0.95 (0.85-1.06) | 0.318 | 1.03 (0.85-1.26) | 0.759 | 0.613 |
| HMDB11420* | C38:7 PE plasmalogen        | 1.05 (0.94-1.17) | 0.402 | 0.95 (0.79-1.16) | 0.642 | 0.75  | HMDB11420* | C38:7 PE plasmalogen        | 1.01 (0.9-1.13)  | 0.861 | 0.94 (0.77-1.15) | 0.553 | 0.613 |
| HMDB00562  | creatinine                  | 0.95 (0.86-1.05) | 0.314 | 0.94 (0.79-1.14) | 0.528 | 0.776 | HMDB00562  | creatinine                  | 0.94 (0.85-1.05) | 0.289 | 0.93 (0.78-1.12) | 0.428 | 0.62  |
| HMDB00630* | cytosine_isomer             | 0.97 (0.88-1.08) | 0.632 | 0.97 (0.8-1.18)  | 0.785 | 0.796 | HMDB00630* | cytosine_isomer             | 0.95 (0.86-1.06) | 0.402 | 0.95 (0.78-1.16) | 0.63  | 0.621 |
| NA         | C34:3 DAG_or_TAG_fragment   | 0.94 (0.84-1.04) | 0.244 | 0.98 (0.8-1.18)  | 0.799 | 0.672 | NA         | C34:3 DAG_or_TAG_fragment   | 0.96 (0.85-1.08) | 0.497 | 1.06 (0.86-1.3)  | 0.609 | 0.621 |
| HMDB01565  | phosphocholine              | 1.13 (1.02-1.26) | 0.022 | 1.07 (0.88-1.3)  | 0.525 | 0.434 | HMDB01565  | phosphocholine              | 1.14 (1.02-1.27) | 0.026 | 1.01 (0.82-1.23) | 0.956 | 0.626 |
| HMDB10379  | C14:0 LPC                   | 0.95 (0.86-1.06) | 0.361 | 1.05 (0.87-1.27) | 0.634 | 0.537 | HMDB10379  | C14:0 LPC                   | 0.94 (0.84-1.04) | 0.233 | 1.07 (0.88-1.3)  | 0.495 | 0.634 |
| HMDB02802  | cortisone                   | 0.95 (0.86-1.06) | 0.367 | 1.04 (0.87-1.29) | 0.72  | 0.555 | HMDB02802  | cortisone                   | 0.95 (0.86-1.06) | 0.368 | 1.03 (0.86-1.28) | 0.789 | 0.635 |
| HMDB10387* | C18:3 LPC                   | 0.97 (0.87-1.07) | 0.5   | 1.11 (0.92-1.34) | 0.285 | 0.329 | HMDB10387* | C18:3 LPC                   | 0.95 (0.86-1.06) | 0.358 | 1.1 (0.91-1.33)  | 0.327 | 0.639 |
| HMDB00054  | bilirubin                   | 0.98 (0.88-1.09) | 0.7   | 0.98 (0.82-1.21) | 0.821 | 0.777 | HMDB00054  | bilirubin                   | 0.98 (0.88-1.09) | 0.703 | 0.98 (0.83-1.22) | 0.858 | 0.641 |
| HMDB29377  | piperine                    | 0.82 (0.74-0.91) | 0     | 0.84 (0.7-1.02)  | 0.076 | 0.797 | HMDB29377  | piperine                    | 0.79 (0.71-0.88) | 0     | 0.84 (0.69-1.02) | 0.076 | 0.655 |
| NA         | threosphingosine            | 0.96 (0.87-1.07) | 0.465 | 1.02 (0.85-1.23) | 0.804 | 0.477 | NA         | threosphingosine            | 0.98 (0.88-1.09) | 0.756 | 1.05 (0.87-1.26) | 0.588 | 0.656 |
| HMDB00301  | uroacnic acid               | 0.98 (0.89-1.08) | 0.7   | 1.04 (0.87-1.23) | 0.684 | 0.718 | HMDB00301  | uroacnic acid               | 0.97 (0.88-1.07) | 0.541 | 1.04 (0.87-1.24) | 0.657 | 0.658 |
| HMDB00092  | dimethylglycine             | 1.05 (0.95-1.17) | 0.321 | 1.04 (0.85-1.25) | 0.728 | 0.875 | HMDB00092  | dimethylglycine             | 1.08 (0.97-1.2)  | 0.182 | 1.08 (0.88-1.31) | 0.464 | 0.667 |
| HMDB01906* | aminoisobutyric acid        | 1.12 (1-1.24)    | 0.04  | 1.02 (0.84-1.23) | 0.861 | 0.794 | HMDB01906* | aminoisobutyric acid        | 1.11 (1-1.24)    | 0.049 | 1.02 (0.84-1.23) | 0.842 | 0.673 |
| HMDB11503  | C16:0 LPE                   | 1.05 (0.95-1.17) | 0.361 | 1.04 (0.86-1.26) | 0.687 | 0.784 | HMDB11503  | C16:0 LPE                   | 1.02 (0.91-1.13) | 0.783 | 0.99 (0.82-1.21) | 0.942 | 0.675 |
| NA         | C20:4 carnitine             | 1.01 (0.91-1.12) | 0.873 | 1.01 (0.84-1.22) | 0.909 | 0.332 | NA         | C20:4 carnitine             | 1.03 (0.93-1.15) | 0.586 | 1.02 (0.85-1.23) | 0.829 | 0.676 |
| NA         | C34:1 DAG_or_TAG_fragment   | 0.92 (0.82-1.02) | 0.113 | 0.94 (0.78-1.14) | 0.555 | 0.796 | NA         | C34:1 DAG_or_TAG_fragment   | 0.92 (0.82-1.04) | 0.185 | 1.02 (0.82-1.25) | 0.887 | 0.676 |
| HMDB04207  | alpha-glutamyllysine        | 1.1 (0.98-1.23)  | 0.118 | 0.91 (0.74-1.13) | 0.387 | 0.594 | HMDB04207  | alpha-glutamyllysine        | 1.1 (0.97-1.24)  | 0.126 | 0.92 (0.75-1.14) | 0.449 | 0.685 |
| HMDB01325  | N6,N6,N6-trimethyllysine    | 0.98 (0.88-1.08) | 0.683 | 1.04 (0.85-1.25) | 0.713 | 0.776 | HMDB01325  | N6,N6,N6-trimethyllysine    | 0.97 (0.87-1.07) | 0.52  | 1.04 (0.85-1.25) | 0.704 | 0.685 |
| HMDB00289  | uric acid                   | 0.95 (0.86-1.05) | 0.309 | 1.07 (0.89-1.57) | 0.606 | 0.754 | HMDB00289  | uric acid                   | 0.96 (0.87-1.06) | 0.412 | 1.17 (0.92-1.91) | 0.422 | 0.686 |
| HMDB01847  | caffeine                    | 0.95 (0.85-1.06) | 0.349 | 0.88 (0.73-1.08) | 0.207 | 0.8   | HMDB01847  | caffeine                    | 0.94 (0.84-1.05) | 0.251 | 0.87 (0.71-1.06) | 0.154 | 0.69  |
| HMDB07883* | C34:4 PC                    | 0.9 (0.81-1.01)  | 0.068 | 0.97 (0.8-1.18)  | 0.784 | 0.993 | HMDB07883* | C34:4 PC                    | 0.89 (0.79-0.99) | 0.039 | 1.01 (0.83-1.24) | 0.926 | 0.703 |
| HMDB06344  | phenylacetylglutamine       | 0.88 (0.8-0.97)  | 0.013 | 0.97 (0.81-1.18) | 0.757 | 0.731 | HMDB06344  | phenylacetylglutamine       | 0.88 (0.8-0.98)  | 0.019 | 0.96 (0.8-1.17)  | 0.694 | 0.712 |
| HMDB00289  | urate                       | 0.95 (0.86-1.04) | 0.254 | 1.08 (0.89-1.57) | 0.597 | 0.786 | HMDB00289  | urate                       | 0.95 (0.86-1.05) | 0.341 | 1.18 (0.92-1.9)  | 0.399 | 0.713 |
| HMDB10384  | C18:0 LPC                   | 1.02 (0.92-1.14) | 0.671 | 1.13 (0.93-1.36) | 0.218 | 0.408 | HMDB10384  | C18:0 LPC                   | 1.03 (0.92-1.14) | 0.635 | 1.12 (0.93-1.36) | 0.242 | 0.717 |
| HMDB00725  | hydroxyproline              | 0.93 (0.84-1.03) | 0.176 | 0.99 (0.81-1.19) | 0.89  | 0.846 | HMDB00725  | hydroxyproline              | 0.94 (0.84-1.04) | 0.246 | 1 (0.82-1.2)     | 0.968 | 0.723 |
| HMDB02815* | C18:1 LPC                   | 1.04 (0.94-1.16) | 0.409 | 1.14 (0.95-1.38) | 0.158 | 0.596 | HMDB02815* | C18:1 LPC                   | 1.03 (0.92-1.15) | 0.596 | 1.1 (0.91-1.34)  | 0.324 | 0.732 |
| HMDB04824  | N2,N2-dimethylguanosine     | 0.93 (0.84-1.03) | 0.188 | 0.97 (0.81-1.18) | 0.791 | 0.771 | HMDB04824  | N2,N2-dimethylguanosine     | 0.94 (0.84-1.05) | 0.254 | 1.03 (0.85-1.26) | 0.75  | 0.736 |
| HMDB04030  | 21-deoxycortisol            | 0.99 (0.89-1.11) | 0.888 | 0.99 (0.81-1.22) | 0.919 | 0.756 | HMDB04030  | 21-deoxycortisol            | 0.98 (0.87-1.1)  | 0.753 | 0.96 (0.78-1.19) | 0.69  | 0.741 |
| HMDB10391* | C20:1 LPC                   | 1.13 (1.01-1.26) | 0.029 | 1.21 (0.99-1.47) | 0.064 | 0.515 | HMDB10391* | C20:1 LPC                   | 1.13 (1.01-1.27) | 0.038 | 1.15 (0.94-1.41) | 0.188 | 0.744 |
| HMDB11507* | C18:2 LPE                   | 1.01 (0.9-1.12)  | 0.9   | 1.14 (0.94-1.38) | 0.194 | 0.596 | HMDB11507* | C18:2 LPE                   | 1 (0.89-1.11)    | 0.96  | 1.11 (0.91-1.35) | 0.314 | 0.748 |
| HMDB00884  | ribothymidine               | 0.98 (0.88-1.08) | 0.663 | 1.09 (0.9-1.34)  | 0.393 | 0.852 | HMDB00884  | ribothymidine               | 0.96 (0.86-1.06) | 0.407 | 1.06 (0.88-1.3)  | 0.551 | 0.756 |
| HMDB00714  | hippurate                   | 1.02 (0.92-1.13) | 0.689 | 1.07 (0.88-1.29) | 0.5   | 0.438 | HMDB00714  | hippurate                   | 1.01 (0.91-1.12) | 0.847 | 1.04 (0.85-1.26) | 0.709 | 0.756 |
| NA         | C34:2 DAG_or_TAG_fragment   | 0.93 (0.84-1.04) | 0.208 | 0.99 (0.81-1.19) | 0.881 | 0.962 | NA         | C34:2 DAG_or_TAG_fragment   | 0.95 (0.85-1.07) | 0.425 | 1.08 (0.87-1.33) | 0.489 | 0.757 |
| HMDB00791  | C8 carnitine                | 1 (0.89-1.11)    | 0.953 | 0.9 (0.74-1.1)   | 0.295 | 0.658 | HMDB00791  | C8 carnitine                | 1 (0.89-1.12)    | 0.971 | 0.92 (0.76-1.11) | 0.375 | 0.758 |
| HMDB00062  | carnitine                   | 0.94 (0.85-1.04) | 0.222 | 1.01 (0.84-1.24) | 0.881 | 0.588 | HMDB00062  | carnitine                   | 0.95 (0.85-1.05) | 0.287 | 1.05 (0.87-1.28) | 0.649 | 0.758 |
| HMDB07973* | C34:2 PC                    | 1 (0.9-1.11)     | 0.955 | 0.96 (0.8-1.16)  | 0.676 | 0.743 | HMDB07973* | C34:2 PC                    | 0.98 (0.88-1.09) | 0.758 | 0.96 (0.8-1.16)  | 0.649 | 0.758 |
| HMDB10386* | C18:2 LPC                   | 1.05 (0.95-1.17) | 0.348 | 1.14 (0.94-1.38) | 0.184 | 0.539 | HMDB10386* | C18:2 LPC                   | 1.03 (0.92-1.16) | 0.606 | 1.08 (0.88-1.32) | 0.489 | 0.762 |
| HMDB13713  | N-acetyltryptophan          | 1 (0.9-1.11)     | 0.978 | 1.05 (0.86-1.26) | 0.647 | 0.86  | HMDB13713  | N-acetyltryptophan          | 0.97 (0.87-1.08) | 0.601 | 1.02 (0.84-1.24) | 0.843 | 0.763 |
| HMDB01886  | 3-methylxanthine            | 1.02 (0.91-1.13) | 0.78  | 1.03 (0.85-1.26) | 0.773 | 0.846 | HMDB01886  | 3-methylxanthine            | 1.02 (0.92-1.14) | 0.675 | 1.02 (0.84-1.25) | 0.864 | 0.764 |
| HMDB08928* | C34:2 PE                    | 0.93 (0.84-1.04) | 0.219 | 0.98 (0.8-1.2)   | 0.84  | 0.914 | HMDB08928* | C34:2 PE                    | 0.92 (0.82-1.04) | 0.184 | 1 (0.82-1.24)    | 0.977 | 0.771 |
| HMDB08925* | C34:0 PE                    | 0.96 (0.87-1.07) | 0.458 | 1.02 (0.85-1.23) | 0.834 | 0.611 | HMDB08925* | C34:0 PE                    | 0.94 (0.84-1.04) | 0.221 | 1.02 (0.85-1.24) | 0.819 | 0.776 |
| HMDB10383* | C16:1 LPC                   | 0.98 (0.88-1.08) | 0.647 | 1.07 (0.88-1.29) | 0.516 | 0.706 | HMDB10383* | C16:1 LPC                   | 0.97 (0.88-1.08) | 0.614 | 1.08 (0.89-1.31) | 0.449 | 0.78  |
| HMDB13238  | C7 carnitine                | 1.03 (0.93-1.15) | 0.58  | 1.03 (0.86-1.25) | 0.763 | 0.687 | HMDB13238  | C7 carnitine                | 1.03 (0.92-1.14) | 0.648 | 1.05 (0.87-1.28) | 0.646 | 0.781 |
| HMDB11229* | C38:7 PC plasmalogen        | 1.03 (0.93-1.15) | 0.546 | 0.94 (0.78-1.14) | 0.542 | 0.7   | HMDB11229* | C38:7 PC plasmalogen        | 1 (0.89-1.11)    | 0.954 | 0.91 (0.74-1.11) | 0.338 | 0.786 |
| HMDB01563  | 1-methylguanosine           | 0.96 (0.87-1.06) | 0.457 | 0.97 (0.8-1.15)  | 0.717 | 0.889 | HMDB01563  | 1-methylguanosine           | 0.97 (0.87-1.08) | 0.581 | 1.01 (0.84-1.19) | 0.954 | 0.789 |
| HMDB00172  | isoleucine                  | 0.94 (0.85-1.04) | 0.252 | 0.91 (0.75-1.1)  | 0.325 | 0.656 | HMDB00172  | isoleucine                  | 0.96 (0.86-1.07) | 0.468 | 0.97 (0.79-1.18) | 0.751 | 0.79  |
| HMDB00158  | tyrosine                    | 0.97 (0.88-1.08) | 0.593 | 1.01 (0.83-1.22) | 0.929 | 0.887 | HMDB00158  | tyrosine                    | 0.97 (0.87-1.09) | 0.637 | 1.07 (0.87-1.31) | 0.523 | 0.792 |
| HMDB05923  | N4-acetylcytidine           | 0.97 (0.87-1.07) | 0.503 | 0.98 (0.8-1.18)  | 0.797 | 0.854 | HMDB05923  | N4-acetylcytidine           | 0.98 (0.88-1.09) | 0.715 | 1.03 (0.85-1.26) | 0.739 | 0.795 |

|                   |                                |                  |       |                  |       |       |                   |                                |                  |       |                  |       |       |
|-------------------|--------------------------------|------------------|-------|------------------|-------|-------|-------------------|--------------------------------|------------------|-------|------------------|-------|-------|
| HMDB00767         | pseudouridine                  | 0.93 (0.84-1.03) | 0.183 | 1.04 (0.86-1.26) | 0.682 | 0.965 | HMDB00767         | pseudouridine                  | 0.94 (0.84-1.05) | 0.252 | 1.09 (0.9-1.32)  | 0.381 | 0.802 |
| HMDB00883         | valine                         | 0.93 (0.84-1.03) | 0.192 | 0.88 (0.73-1.07) | 0.203 | 0.814 | HMDB00883         | valine                         | 0.95 (0.85-1.06) | 0.337 | 0.95 (0.77-1.16) | 0.613 | 0.803 |
| HMDB10395         | C20:4 LPC                      | 1.01 (0.91-1.12) | 0.897 | 1.03 (0.86-1.25) | 0.727 | 0.739 | HMDB10395         | C20:4 LPC                      | 1.01 (0.91-1.12) | 0.898 | 1.02 (0.84-1.24) | 0.846 | 0.806 |
| HMDB01991         | 7-methylxanthine               | 1.02 (0.92-1.13) | 0.732 | 1.07 (0.88-1.31) | 0.499 | 0.859 | HMDB01991         | 7-methylxanthine               | 1.04 (0.93-1.15) | 0.486 | 1.07 (0.88-1.31) | 0.529 | 0.816 |
| HMDB00991*        | 2-aminooctanoic acid           | 0.98 (0.89-1.09) | 0.762 | 0.99 (0.82-1.2)  | 0.939 | 0.661 | HMDB00991*        | 2-aminooctanoic acid           | 0.99 (0.9-1.1)   | 0.872 | 0.98 (0.81-1.18) | 0.809 | 0.819 |
| HMDB00630         | cytosine                       | 0.97 (0.88-1.07) | 0.523 | 0.98 (0.81-1.19) | 0.8   | 0.881 | HMDB00630         | cytosine                       | 0.96 (0.87-1.06) | 0.423 | 0.96 (0.8-1.18)  | 0.717 | 0.829 |
| NA                | C46:2 TAG                      | 0.88 (0.79-0.98) | 0.018 | 0.95 (0.79-1.15) | 0.618 | 0.842 | NA                | C46:2 TAG                      | 0.87 (0.78-0.97) | 0.015 | 0.98 (0.81-1.2)  | 0.866 | 0.835 |
| HMDB00679         | homocitrulline                 | 1 (0.9-1.11)     | 0.957 | 0.92 (0.77-1.11) | 0.369 | 0.786 | HMDB00679         | homocitrulline                 | 0.98 (0.88-1.09) | 0.722 | 0.91 (0.76-1.11) | 0.333 | 0.838 |
| NA                | C46:3 TAG                      | 0.88 (0.79-0.98) | 0.024 | 0.97 (0.8-1.17)  | 0.74  | 0.788 | NA                | C46:3 TAG                      | 0.88 (0.79-0.98) | 0.025 | 1 (0.82-1.22)    | 0.961 | 0.845 |
| HMDB11526         | C22:6 LPE                      | 1.04 (0.93-1.16) | 0.476 | 1.05 (0.87-1.28) | 0.605 | 0.9   | HMDB11526         | C22:6 LPE                      | 1.01 (0.91-1.13) | 0.848 | 1.03 (0.85-1.26) | 0.736 | 0.864 |
| HMDB02013         | C4 carnitine                   | 0.93 (0.84-1.04) | 0.197 | 0.98 (0.81-1.18) | 0.805 | 0.828 | HMDB02013         | C4 carnitine                   | 0.93 (0.83-1.03) | 0.17  | 1 (0.82-1.21)    | 0.982 | 0.873 |
| Internal Standard | valine-d8                      | 1.04 (0.94-1.16) | 0.441 | 0.92 (0.79-1.08) | 0.275 | 0.544 | Internal Standard | valine-d8                      | 1.05 (0.94-1.16) | 0.4   | 0.94 (0.81-1.11) | 0.425 | 0.877 |
| HMDB00705         | C6 carnitine                   | 0.96 (0.86-1.07) | 0.484 | 0.96 (0.79-1.17) | 0.717 | 0.962 | HMDB00705         | C6 carnitine                   | 0.97 (0.87-1.08) | 0.583 | 1 (0.82-1.21)    | 0.989 | 0.878 |
| HMDB10169         | C16:0 SM                       | 1.08 (0.98-1.2)  | 0.138 | 0.95 (0.79-1.14) | 0.545 | 0.934 | HMDB10169         | C16:0 SM                       | 1.07 (0.97-1.2)  | 0.19  | 0.94 (0.78-1.13) | 0.486 | 0.882 |
| HMDB00688         | C5 carnitine                   | 0.95 (0.86-1.06) | 0.377 | 1.09 (0.9-1.31)  | 0.372 | 0.844 | HMDB00688         | C5 carnitine                   | 0.96 (0.86-1.07) | 0.496 | 1.15 (0.95-1.4)  | 0.144 | 0.882 |
| HMDB00716         | pipecolic acid                 | 0.99 (0.89-1.1)  | 0.86  | 1.01 (0.82-1.23) | 0.933 | 0.834 | HMDB00716         | pipecolic acid                 | 0.97 (0.87-1.09) | 0.641 | 1.01 (0.82-1.24) | 0.911 | 0.889 |
| HMDB11506*        | C18:1 LPE                      | 1.01 (0.91-1.13) | 0.819 | 1.1 (0.91-1.34)  | 0.335 | 0.857 | HMDB11506*        | C18:1 LPE                      | 1 (0.9-1.12)     | 0.964 | 1.07 (0.88-1.31) | 0.481 | 0.892 |
| HMDB00026         | N-carbamoyl-beta-alanine       | 0.94 (0.85-1.03) | 0.198 | 1.02 (0.84-1.23) | 0.849 | 0.654 | HMDB00026         | N-carbamoyl-beta-alanine       | 0.93 (0.84-1.03) | 0.183 | 1.03 (0.85-1.25) | 0.75  | 0.906 |
| HMDB11394*        | C40:7 PE plasmalogen           | 1.09 (0.99-1.21) | 0.092 | 1.03 (0.85-1.24) | 0.784 | 0.999 | HMDB11394*        | C40:7 PE plasmalogen           | 1.07 (0.96-1.2)  | 0.192 | 0.99 (0.82-1.2)  | 0.921 | 0.912 |
| HMDB13127         | C4-OH carnitine                | 1.06 (0.95-1.18) | 0.306 | 1.14 (0.94-1.4)  | 0.189 | 0.843 | HMDB13127         | C4-OH carnitine                | 1.09 (0.97-1.22) | 0.135 | 1.21 (0.99-1.49) | 0.074 | 0.935 |
| HMDB04400         | 5-acetylamino-6-amino-3-methyl | 0.91 (0.82-1.01) | 0.083 | 0.92 (0.77-1.13) | 0.391 | 0.948 | HMDB04400         | 5-acetylamino-6-amino-3-methyl | 0.92 (0.83-1.03) | 0.156 | 0.91 (0.76-1.11) | 0.334 | 0.936 |
| HMDB00162         | proline                        | 0.98 (0.88-1.09) | 0.709 | 1 (0.83-1.22)    | 0.96  | 0.988 | HMDB00162         | proline                        | 0.99 (0.89-1.11) | 0.914 | 1.05 (0.87-1.28) | 0.598 | 0.939 |
| HMDB05066         | C14 carnitine                  | 1.02 (0.92-1.13) | 0.745 | 1.05 (0.87-1.27) | 0.627 | 0.764 | HMDB05066         | C14 carnitine                  | 1.02 (0.92-1.14) | 0.672 | 1.07 (0.88-1.3)  | 0.495 | 0.939 |
| HMDB01396         | glycocholate                   | 0.99 (0.89-1.1)  | 0.86  | 1.03 (0.85-1.26) | 0.743 | 0.887 | HMDB01396         | glycocholate                   | 1 (0.9-1.12)     | 0.949 | 1.07 (0.88-1.32) | 0.493 | 0.941 |
| HMDB04827         | proline betaine                | 0.96 (0.86-1.06) | 0.391 | 1 (0.83-1.21)    | 0.984 | 0.605 | HMDB04827         | proline betaine                | 0.94 (0.85-1.05) | 0.267 | 0.99 (0.82-1.2)  | 0.92  | 0.944 |
| HMDB59824         | 4-hydroxy-3-methylacetophenon  | 1 (0.91-1.11)    | 0.926 | 0.99 (0.83-1.2)  | 0.913 | 0.848 | HMDB59824         | 4-hydroxy-3-methylacetophenon  | 1.01 (0.91-1.12) | 0.901 | 1.01 (0.85-1.23) | 0.89  | 0.947 |
| HMDB10404         | C22:6 LPC                      | 1.03 (0.93-1.14) | 0.611 | 1.11 (0.92-1.35) | 0.261 | 0.852 | HMDB10404         | C22:6 LPC                      | 1 (0.89-1.11)    | 0.941 | 1.08 (0.89-1.32) | 0.444 | 0.95  |
| HMDB11478*        | C18:3 LPE                      | 0.96 (0.87-1.06) | 0.438 | 1.15 (0.94-1.44) | 0.206 | 0.717 | HMDB11478*        | C18:3 LPE                      | 0.95 (0.85-1.05) | 0.274 | 1.12 (0.92-1.4)  | 0.292 | 0.951 |
| HMDB10382         | C16:0 LPC                      | 1.02 (0.92-1.13) | 0.695 | 1.07 (0.89-1.28) | 0.494 | 0.588 | HMDB10382         | C16:0 LPC                      | 1.01 (0.91-1.12) | 0.892 | 1.05 (0.87-1.27) | 0.603 | 0.952 |
| HMDB01257         | spermidine                     | 1.1 (0.99-1.22)  | 0.073 | 1.01 (0.83-1.23) | 0.908 | 0.884 | HMDB01257         | spermidine                     | 1.1 (0.99-1.22)  | 0.089 | 1.03 (0.84-1.25) | 0.776 | 0.959 |
| HMDB11517         | C20:4 LPE                      | 1.01 (0.91-1.13) | 0.79  | 1.04 (0.86-1.26) | 0.703 | 0.926 | HMDB11517         | C20:4 LPE                      | 1.02 (0.92-1.14) | 0.712 | 1.03 (0.85-1.26) | 0.739 | 0.961 |
| HMDB07869*        | C30:0 PC                       | 0.93 (0.84-1.04) | 0.198 | 0.98 (0.81-1.19) | 0.855 | 0.732 | HMDB07869*        | C30:0 PC                       | 0.9 (0.8-1)      | 0.055 | 0.98 (0.81-1.19) | 0.859 | 0.965 |
| HMDB00063         | cortisol                       | 0.98 (0.87-1.09) | 0.683 | 0.98 (0.81-1.21) | 0.86  | 0.921 | HMDB00063         | cortisol                       | 0.97 (0.87-1.1)  | 0.663 | 0.96 (0.79-1.19) | 0.727 | 0.969 |
| NA                | C44:2 TAG                      | 0.89 (0.8-0.99)  | 0.027 | 0.97 (0.8-1.17)  | 0.726 | 0.877 | NA                | C44:2 TAG                      | 0.88 (0.78-0.98) | 0.022 | 0.99 (0.81-1.21) | 0.956 | 0.984 |
| HMDB10403         | C22:5 LPC                      | 0.95 (0.86-1.06) | 0.356 | 1.03 (0.86-1.25) | 0.73  | 0.936 | HMDB10403         | C22:5 LPC                      | 0.94 (0.85-1.05) | 0.292 | 1.01 (0.83-1.23) | 0.909 | 0.985 |
| HMDB00991*        | 2-aminooctanoic acid           | 1.06 (0.96-1.18) | 0.255 | 1.03 (0.85-1.25) | 0.783 | 0.781 | HMDB00991*        | 2-aminooctanoic acid           | 1.06 (0.96-1.18) | 0.253 | 1 (0.83-1.22)    | 0.986 | 0.991 |
| HMDB00033         | carnosine                      | 0.96 (0.87-1.07) | 0.447 | 0.88 (0.74-1.07) | 0.188 | 0.773 | HMDB00033         | carnosine                      | 0.95 (0.86-1.06) | 0.366 | 0.9 (0.75-1.09)  | 0.289 | 0.994 |
| HMDB11103         | 1,7-dimethyluric acid          | 0.9 (0.81-1)     | 0.05  | 0.92 (0.77-1.12) | 0.389 | 0.974 | HMDB11103         | 1,7-dimethyluric acid          | 0.9 (0.81-1.01)  | 0.06  | 0.91 (0.76-1.11) | 0.327 | 0.999 |

**Supplemental Table 4. : Odds ratios (OR) of breast cancer and 95% confidence intervals (CI) per 1 SD increase for all metabolites, by BMI categories (normal BMI: BMI<25, high BMI: BMI≥25).**

Simple model: adjusts for matching factors including menopause status at blood draw, time of blood draw, date/season of blood draw, luteal day at blood draw, fasting status at blood draw, menopausal status at diagnosis and race.

Adjusted model: in addition to matching factors, this model adjusts for BMI at age 18, weight change between age 18 and time of blood draw, age at menarche, parity and age at first birth, family history of breast cancer, personal history of benign breast disease, physical activity, alcohol consumption, exogenous hormone use, breast feeding history.

| HMDB_ID    | METABOLITE                        | Simple Model     |       |                  |       |       |
|------------|-----------------------------------|------------------|-------|------------------|-------|-------|
|            |                                   | High BMI         |       | Normal BMI       |       | p.het |
|            |                                   | OR (95% CI)      | PVAL  | OR (95% CI)      | PVAL  |       |
| NA         | C36:4 DAG_or_TAG_fragment         | 0.89 (0.77-1.01) | 0.077 | 1.18 (1.04-1.33) | 0.008 | 0.001 |
| HMDB04030  | 21-deoxycortisol                  | 1.08 (0.95-1.24) | 0.259 | 0.91 (0.79-1.05) | 0.191 | 0.008 |
| HMDB00187  | serine                            | 1.17 (1.02-1.34) | 0.027 | 0.93 (0.83-1.05) | 0.242 | 0.022 |
| NA         | C34:1 DAG_or_TAG_fragment         | 0.88 (0.77-1.01) | 0.062 | 1.16 (1.03-1.31) | 0.019 | 0.002 |
| HMDB04827  | proline betaine                   | 0.83 (0.73-0.95) | 0.007 | 1.04 (0.92-1.17) | 0.538 | 0.018 |
| HMDB09012* | C40:6 PE                          | 0.87 (0.75-1)    | 0.047 | 1.1 (0.96-1.25)  | 0.168 | 0.011 |
| NA         | C38:5 DAG_or_TAG_fragment         | 0.88 (0.77-1.01) | 0.076 | 1.13 (0.99-1.3)  | 0.077 | 0.009 |
| NA         | C36:3 DAG_or_TAG_fragment         | 0.92 (0.8-1.05)  | 0.201 | 1.15 (1.01-1.31) | 0.031 | 0.012 |
| HMDB00679  | homocitrulline                    | 0.87 (0.76-0.99) | 0.034 | 1.08 (0.96-1.22) | 0.203 | 0.032 |
| NA         | DMGV                              | 0.78 (0.67-0.91) | 0.001 | 0.93 (0.82-1.05) | 0.246 | 0.044 |
| HMDB01859  | acetaminophen                     | 1.08 (0.95-1.23) | 0.239 | 0.9 (0.8-1.01)   | 0.074 | 0.032 |
| HMDB13325  | C10:2 carnitine                   | 0.83 (0.71-0.96) | 0.016 | 1.01 (0.9-1.13)  | 0.858 | 0.033 |
| NA         | C34:2 DAG_or_TAG_fragment         | 0.9 (0.79-1.04)  | 0.148 | 1.12 (0.99-1.27) | 0.074 | 0.016 |
| HMDB00714  | hippurate                         | 1.13 (0.99-1.29) | 0.073 | 0.96 (0.85-1.07) | 0.445 | 0.032 |
| NA         | N-methylproline                   | 0.84 (0.73-0.96) | 0.011 | 1.04 (0.93-1.16) | 0.529 | 0.025 |
| HMDB00128  | guanidinoacetic acid              | 1.15 (1.01-1.32) | 0.041 | 0.97 (0.86-1.09) | 0.63  | 0.072 |
| HMDB09003* | C38:4 PE                          | 0.87 (0.76-1)    | 0.052 | 1.07 (0.94-1.23) | 0.285 | 0.034 |
| HMDB07874* | C32:2 PC                          | 0.93 (0.8-1.07)  | 0.302 | 1.08 (0.95-1.21) | 0.234 | 0.06  |
| HMDB09102* | C38:6 PE                          | 0.93 (0.8-1.07)  | 0.294 | 1.1 (0.97-1.25)  | 0.12  | 0.055 |
| HMDB00883  | valine                            | 0.82 (0.71-0.94) | 0.005 | 1.01 (0.9-1.15)  | 0.816 | 0.018 |
| NA         | C34:2 DAG_or_TAG_fragment         | 0.9 (0.79-1.03)  | 0.114 | 1.1 (0.96-1.27)  | 0.169 | 0.022 |
| HMDB00812  | N-acetylaspartic acid             | 1.11 (0.96-1.27) | 0.153 | 0.93 (0.83-1.05) | 0.223 | 0.088 |
| HMDB00884  | ribothymidine                     | 1.11 (0.97-1.29) | 0.136 | 0.95 (0.84-1.06) | 0.358 | 0.054 |
| HMDB00687  | leucine                           | 0.83 (0.72-0.95) | 0.008 | 1.02 (0.9-1.15)  | 0.769 | 0.025 |
| HMDB00123  | glycine                           | 1.08 (0.94-1.23) | 0.273 | 0.95 (0.84-1.07) | 0.377 | 0.099 |
| HMDB11526  | C22:6 LPE                         | 1.01 (0.87-1.16) | 0.904 | 1.14 (1.01-1.28) | 0.038 | 0.104 |
| NA         | C34:3 DAG_or_TAG_fragment         | 0.9 (0.79-1.04)  | 0.152 | 1.1 (0.96-1.25)  | 0.18  | 0.03  |
| HMDB08994* | C36:2 PE                          | 0.87 (0.76-1)    | 0.05  | 1.05 (0.92-1.19) | 0.495 | 0.049 |
| HMDB07883* | C34:4 PC                          | 0.88 (0.76-1.02) | 0.083 | 1.01 (0.89-1.14) | 0.926 | 0.087 |
| HMDB00631* | glycyldeoxycholate/glycochenodeo: | 1.1 (0.95-1.27)  | 0.201 | 0.93 (0.82-1.06) | 0.273 | 0.194 |
| HMDB02815* | C18:1 LPC                         | 1.11 (0.97-1.28) | 0.131 | 0.96 (0.85-1.08) | 0.467 | 0.079 |
| HMDB00289  | uric acid                         | 0.72 (0.51-1.01) | 0.061 | 1 (0.91-1.1)     | 0.968 | 0.011 |
| HMDB00289  | urate                             | 0.72 (0.51-1.01) | 0.056 | 1 (0.91-1.09)    | 0.941 | 0.011 |
| HMDB11512* | C20:1 LPE                         | 1.07 (0.94-1.21) | 0.34  | 0.92 (0.81-1.03) | 0.155 | 0.12  |
| HMDB00063  | cortisol                          | 1.05 (0.91-1.21) | 0.512 | 0.97 (0.85-1.11) | 0.692 | 0.153 |
| HMDB01906* | aminoisobutyric acid              | 1.12 (0.98-1.28) | 0.098 | 1.03 (0.92-1.16) | 0.622 | 0.339 |
| HMDB32055  | N-acetylhistidine                 | 1.04 (0.9-1.19)  | 0.584 | 0.95 (0.84-1.07) | 0.39  | 0.27  |
| HMDB01008  | biliverdin                        | 0.96 (0.78-1.19) | 0.739 | 1.07 (0.97-1.2)  | 0.177 | 0.326 |
| HMDB02802  | cortisone                         | 1.02 (0.89-1.18) | 0.773 | 0.96 (0.85-1.09) | 0.533 | 0.284 |
| HMDB00159  | phenylalanine                     | 0.89 (0.77-1.03) | 0.116 | 1.08 (0.96-1.21) | 0.199 | 0.028 |
| HMDB01565  | phosphocholine                    | 1.13 (0.99-1.3)  | 0.069 | 1.03 (0.91-1.17) | 0.591 | 0.136 |
| HMDB11441* | C36:3 PE plasmalogen              | 1.08 (0.95-1.23) | 0.254 | 0.98 (0.87-1.1)  | 0.705 | 0.147 |
| HMDB00630  | cytosine                          | 1.01 (0.89-1.16) | 0.838 | 0.94 (0.83-1.05) | 0.278 | 0.299 |
| HMDB00716  | pipecolic acid                    | 0.89 (0.77-1.03) | 0.112 | 1.04 (0.92-1.17) | 0.526 | 0.116 |
| HMDB00161  | alanine                           | 0.88 (0.76-1.02) | 0.093 | 1.02 (0.91-1.16) | 0.688 | 0.048 |
| HMDB29377  | piperine                          | 0.76 (0.66-0.89) | 0     | 0.9 (0.81-1.01)  | 0.071 | 0.122 |
| HMDB04207  | alpha-glutamyllysine              | 1.08 (0.93-1.26) | 0.301 | 0.99 (0.87-1.13) | 0.885 | 0.621 |

| HMDB_ID    | METABOLITE                        | Adjusted Model   |       |                  |       |       |
|------------|-----------------------------------|------------------|-------|------------------|-------|-------|
|            |                                   | High BMI         |       | Normal BMI       |       | p.het |
|            |                                   | OR (95% CI)      | PVAL  | OR (95% CI)      | PVAL  |       |
| NA         | C36:4 DAG_or_TAG_fragment         | 0.92 (0.8-1.06)  | 0.26  | 1.21 (1.06-1.37) | 0.004 | 0.005 |
| HMDB04030  | 21-deoxycortisol                  | 1.08 (0.94-1.25) | 0.278 | 0.89 (0.77-1.03) | 0.109 | 0.007 |
| HMDB00187  | serine                            | 1.19 (1.04-1.38) | 0.013 | 0.93 (0.83-1.05) | 0.249 | 0.008 |
| NA         | C34:1 DAG_or_TAG_fragment         | 0.92 (0.79-1.06) | 0.253 | 1.18 (1.04-1.34) | 0.01  | 0.009 |
| HMDB04827  | proline betaine                   | 0.82 (0.72-0.94) | 0.005 | 1.04 (0.92-1.17) | 0.557 | 0.017 |
| HMDB09012* | C40:6 PE                          | 0.87 (0.75-1.01) | 0.066 | 1.09 (0.96-1.25) | 0.197 | 0.023 |
| NA         | C38:5 DAG_or_TAG_fragment         | 0.92 (0.79-1.06) | 0.242 | 1.12 (0.98-1.29) | 0.102 | 0.028 |
| NA         | C36:3 DAG_or_TAG_fragment         | 0.97 (0.84-1.11) | 0.627 | 1.18 (1.03-1.35) | 0.017 | 0.033 |
| HMDB00679  | homocitrulline                    | 0.86 (0.75-0.99) | 0.031 | 1.08 (0.96-1.23) | 0.209 | 0.036 |
| NA         | DMGV                              | 0.82 (0.7-0.97)  | 0.019 | 0.94 (0.83-1.06) | 0.32  | 0.038 |
| HMDB01859  | acetaminophen                     | 1.05 (0.92-1.21) | 0.454 | 0.89 (0.79-1)    | 0.059 | 0.042 |
| HMDB13325  | C10:2 carnitine                   | 0.83 (0.71-0.98) | 0.024 | 1.01 (0.9-1.13)  | 0.9   | 0.05  |
| NA         | C34:2 DAG_or_TAG_fragment         | 0.94 (0.81-1.09) | 0.416 | 1.12 (0.99-1.27) | 0.074 | 0.051 |
| HMDB00714  | hippurate                         | 1.11 (0.96-1.28) | 0.155 | 0.95 (0.84-1.07) | 0.427 | 0.053 |
| NA         | N-methylproline                   | 0.86 (0.74-0.99) | 0.031 | 1.04 (0.93-1.17) | 0.514 | 0.056 |
| HMDB00128  | guanidinoacetic acid              | 1.14 (0.99-1.31) | 0.08  | 0.98 (0.87-1.1)  | 0.722 | 0.065 |
| HMDB09003* | C38:4 PE                          | 0.9 (0.78-1.03)  | 0.136 | 1.1 (0.96-1.26)  | 0.185 | 0.07  |
| HMDB07874* | C32:2 PC                          | 0.92 (0.79-1.06) | 0.249 | 1.06 (0.94-1.2)  | 0.361 | 0.074 |
| HMDB09102* | C38:6 PE                          | 0.91 (0.78-1.05) | 0.205 | 1.1 (0.97-1.25)  | 0.153 | 0.077 |
| HMDB00883  | valine                            | 0.86 (0.74-1)    | 0.046 | 1 (0.88-1.13)    | 0.961 | 0.078 |
| NA         | C34:2 DAG_or_TAG_fragment         | 0.94 (0.82-1.09) | 0.421 | 1.1 (0.95-1.27)  | 0.201 | 0.088 |
| HMDB00812  | N-acetylaspartic acid             | 1.1 (0.95-1.28)  | 0.193 | 0.92 (0.82-1.04) | 0.199 | 0.09  |
| HMDB00884  | ribothymidine                     | 1.09 (0.94-1.26) | 0.266 | 0.93 (0.83-1.05) | 0.253 | 0.093 |
| HMDB00687  | leucine                           | 0.87 (0.75-1.01) | 0.067 | 1.01 (0.89-1.14) | 0.865 | 0.097 |
| HMDB00123  | glycine                           | 1.07 (0.93-1.23) | 0.355 | 0.96 (0.84-1.08) | 0.485 | 0.101 |
| HMDB11526  | C22:6 LPE                         | 0.98 (0.85-1.14) | 0.818 | 1.12 (0.99-1.27) | 0.082 | 0.111 |
| NA         | C34:3 DAG_or_TAG_fragment         | 0.95 (0.82-1.1)  | 0.518 | 1.09 (0.95-1.25) | 0.208 | 0.111 |
| HMDB08994* | C36:2 PE                          | 0.89 (0.77-1.03) | 0.112 | 1.06 (0.93-1.22) | 0.355 | 0.114 |
| HMDB07883* | C34:4 PC                          | 0.88 (0.75-1.02) | 0.086 | 0.98 (0.86-1.12) | 0.767 | 0.119 |
| HMDB00631* | glycyldeoxycholate/glycochenodeo: | 1.14 (0.98-1.33) | 0.098 | 0.94 (0.82-1.06) | 0.31  | 0.125 |
| HMDB02815* | C18:1 LPC                         | 1.08 (0.94-1.25) | 0.282 | 0.96 (0.85-1.08) | 0.504 | 0.129 |
| HMDB00289  | uric acid                         | 0.8 (0.55-1.16)  | 0.247 | 1 (0.91-1.1)     | 0.98  | 0.138 |
| HMDB00289  | urate                             | 0.8 (0.56-1.15)  | 0.237 | 0.99 (0.9-1.09)  | 0.873 | 0.14  |
| HMDB11512* | C20:1 LPE                         | 1.04 (0.91-1.19) | 0.605 | 0.91 (0.81-1.03) | 0.143 | 0.154 |
| HMDB00063  | cortisol                          | 1.06 (0.91-1.23) | 0.466 | 0.96 (0.84-1.1)  | 0.569 | 0.156 |
| HMDB01906* | aminoisobutyric acid              | 1.13 (0.99-1.3)  | 0.078 | 1.02 (0.9-1.15)  | 0.761 | 0.157 |
| HMDB32055  | N-acetylhistidine                 | 1.06 (0.91-1.22) | 0.458 | 0.95 (0.84-1.07) | 0.421 | 0.158 |
| HMDB01008  | biliverdin                        | 0.95 (0.76-1.18) | 0.639 | 1.08 (0.98-1.21) | 0.144 | 0.165 |
| HMDB02802  | cortisone                         | 1.03 (0.89-1.19) | 0.663 | 0.95 (0.84-1.08) | 0.456 | 0.165 |
| HMDB00159  | phenylalanine                     | 0.95 (0.82-1.11) | 0.515 | 1.06 (0.94-1.19) | 0.327 | 0.173 |
| HMDB01565  | phosphocholine                    | 1.11 (0.97-1.29) | 0.138 | 1.05 (0.93-1.19) | 0.435 | 0.182 |
| HMDB11441* | C36:3 PE plasmalogen              | 1.07 (0.93-1.22) | 0.342 | 0.98 (0.87-1.11) | 0.747 | 0.184 |
| HMDB00630  | cytosine                          | 1.02 (0.89-1.17) | 0.771 | 0.93 (0.83-1.05) | 0.23  | 0.185 |
| HMDB00716  | pipecolic acid                    | 0.89 (0.77-1.04) | 0.147 | 1.03 (0.9-1.16)  | 0.7   | 0.197 |
| HMDB00161  | alanine                           | 0.93 (0.79-1.09) | 0.385 | 1.02 (0.9-1.15)  | 0.808 | 0.199 |
| HMDB29377  | piperine                          | 0.74 (0.63-0.86) | 0     | 0.88 (0.78-0.98) | 0.025 | 0.202 |
| HMDB04207  | alpha-glutamyllysine              | 1.13 (0.97-1.32) | 0.132 | 0.97 (0.85-1.1)  | 0.619 | 0.206 |

|            |                                 |                  |       |                  |       |       |            |                                 |                  |       |                  |       |       |
|------------|---------------------------------|------------------|-------|------------------|-------|-------|------------|---------------------------------|------------------|-------|------------------|-------|-------|
| HMDB13238  | C7 carnitine                    | 1.12 (0.97-1.29) | 0.136 | 0.98 (0.88-1.1)  | 0.735 | 0.32  | HMDB13238  | C7 carnitine                    | 1.13 (0.97-1.31) | 0.11  | 0.97 (0.86-1.08) | 0.56  | 0.21  |
| HMDB05862  | 2-methylguanosine               | 1.16 (0.99-1.38) | 0.08  | 1.03 (0.92-1.15) | 0.664 | 0.346 | HMDB05862  | 2-methylguanosine               | 1.22 (1.02-1.47) | 0.038 | 1.02 (0.9-1.14)  | 0.787 | 0.216 |
| NA         | C36:2 DAG_or_TAG_fragment       | 0.92 (0.81-1.05) | 0.233 | 1.07 (0.93-1.22) | 0.354 | 0.097 | NA         | C36:2 DAG_or_TAG_fragment       | 0.97 (0.85-1.12) | 0.707 | 1.07 (0.93-1.22) | 0.347 | 0.217 |
| HMDB04193  | N1-methyl-2-pyridone-5-carboxam | 0.86 (0.74-1)    | 0.046 | 1.01 (0.9-1.13)  | 0.831 | 0.069 | HMDB04193  | N1-methyl-2-pyridone-5-carboxam | 0.88 (0.76-1.02) | 0.097 | 0.99 (0.88-1.11) | 0.803 | 0.218 |
| HMDB00562  | creatinine                      | 1 (0.87-1.14)    | 0.962 | 0.91 (0.8-1.02)  | 0.098 | 0.161 | HMDB00562  | creatinine                      | 0.99 (0.86-1.14) | 0.915 | 0.91 (0.8-1.02)  | 0.108 | 0.219 |
| HMDB01563  | 1-methylguanosine               | 1.03 (0.89-1.2)  | 0.69  | 0.96 (0.85-1.07) | 0.433 | 0.428 | HMDB01563  | 1-methylguanosine               | 1.11 (0.95-1.3)  | 0.183 | 0.94 (0.84-1.06) | 0.316 | 0.222 |
| HMDB04400  | 5-acetylamino-6-amino-3-methylu | 1 (0.86-1.17)    | 0.976 | 0.86 (0.77-0.96) | 0.009 | 0.132 | HMDB04400  | 5-acetylamino-6-amino-3-methylu | 1.02 (0.87-1.19) | 0.848 | 0.87 (0.77-0.98) | 0.025 | 0.226 |
| HMDB03357  | N-acetylmornithine              | 0.95 (0.83-1.08) | 0.422 | 1.06 (0.94-1.19) | 0.327 | 0.27  | HMDB03357  | N-acetylmornithine              | 0.93 (0.81-1.07) | 0.336 | 1.04 (0.93-1.17) | 0.478 | 0.227 |
| HMDB01886  | 3-methylxanthine                | 1.12 (0.96-1.3)  | 0.149 | 0.95 (0.85-1.06) | 0.323 | 0.167 | HMDB01886  | 3-methylxanthine                | 1.15 (0.98-1.34) | 0.091 | 0.96 (0.85-1.07) | 0.438 | 0.231 |
| HMDB02366  | C5:1 carnitine                  | 0.92 (0.8-1.05)  | 0.227 | 1.05 (0.94-1.18) | 0.395 | 0.189 | HMDB02366  | C5:1 carnitine                  | 0.92 (0.8-1.06)  | 0.256 | 1.04 (0.92-1.17) | 0.537 | 0.235 |
| HMDB13130  | C5-DC carnitine                 | 0.92 (0.8-1.05)  | 0.208 | 1.02 (0.91-1.15) | 0.758 | 0.317 | HMDB13130  | C5-DC carnitine                 | 0.91 (0.79-1.05) | 0.219 | 1.02 (0.9-1.15)  | 0.78  | 0.239 |
| HMDB00641  | glutamine                       | 1.09 (0.94-1.26) | 0.263 | 0.99 (0.88-1.11) | 0.831 | 0.364 | HMDB00641  | glutamine                       | 1.11 (0.95-1.29) | 0.194 | 0.97 (0.86-1.09) | 0.622 | 0.248 |
| HMDB00688  | C5 carnitine                    | 0.89 (0.77-1.01) | 0.082 | 1.01 (0.9-1.14)  | 0.817 | 0.137 | HMDB00688  | C5 carnitine                    | 0.91 (0.79-1.05) | 0.196 | 1.01 (0.89-1.14) | 0.901 | 0.251 |
| NA         | glutamic acid amide             | 1.08 (0.93-1.26) | 0.292 | 0.99 (0.88-1.11) | 0.818 | 0.386 | NA         | glutamic acid amide             | 1.1 (0.95-1.29)  | 0.21  | 0.97 (0.86-1.09) | 0.603 | 0.251 |
| HMDB00172  | isoleucine                      | 0.85 (0.74-0.97) | 0.019 | 0.99 (0.87-1.11) | 0.824 | 0.075 | HMDB00172  | isoleucine                      | 0.9 (0.77-1.04)  | 0.147 | 0.98 (0.86-1.11) | 0.708 | 0.255 |
| HMDB01396  | glycocholate                    | 1.04 (0.9-1.21)  | 0.584 | 0.97 (0.86-1.09) | 0.624 | 0.554 | HMDB01396  | glycocholate                    | 1.09 (0.93-1.28) | 0.28  | 0.98 (0.86-1.1)  | 0.682 | 0.261 |
| HMDB02820  | methylimidazole acetic acid     | 0.97 (0.85-1.11) | 0.658 | 1.04 (0.92-1.17) | 0.54  | 0.702 | HMDB02820  | methylimidazole acetic acid     | 0.94 (0.82-1.08) | 0.404 | 1.04 (0.93-1.18) | 0.475 | 0.268 |
| HMDB01847  | caffeine                        | 1.04 (0.89-1.21) | 0.633 | 0.89 (0.79-1)    | 0.046 | 0.247 | HMDB01847  | caffeine                        | 1.02 (0.87-1.2)  | 0.787 | 0.87 (0.78-1)    | 0.049 | 0.271 |
| HMDB08937* | C36:4 PE                        | 0.91 (0.79-1.04) | 0.167 | 1.04 (0.92-1.19) | 0.521 | 0.137 | HMDB08937* | C36:4 PE                        | 0.92 (0.79-1.06) | 0.23  | 1.05 (0.92-1.21) | 0.478 | 0.273 |
| HMDB11343* | C34:3 PE plasmalogen            | 1.05 (0.92-1.19) | 0.49  | 0.99 (0.88-1.11) | 0.864 | 0.344 | HMDB11343* | C34:3 PE plasmalogen            | 1.04 (0.91-1.19) | 0.556 | 0.98 (0.87-1.11) | 0.77  | 0.276 |
| HMDB05923  | N4-acetylcytidine               | 0.99 (0.87-1.13) | 0.856 | 0.94 (0.83-1.06) | 0.288 | 0.493 | HMDB05923  | N4-acetylcytidine               | 1.05 (0.91-1.21) | 0.528 | 0.94 (0.83-1.06) | 0.303 | 0.28  |
| HMDB11103  | 1,7-dimethyluric acid           | 1 (0.86-1.17)    | 0.95  | 0.87 (0.77-0.97) | 0.012 | 0.215 | HMDB11103  | 1,7-dimethyluric acid           | 1.01 (0.86-1.18) | 0.948 | 0.87 (0.77-0.98) | 0.021 | 0.281 |
| HMDB10391* | C20:1 LPC                       | 1.18 (1.02-1.37) | 0.03  | 1.04 (0.93-1.17) | 0.456 | 0.173 | HMDB10391* | C20:1 LPC                       | 1.16 (1-1.36)    | 0.053 | 1.06 (0.94-1.19) | 0.363 | 0.281 |
| HMDB00904  | citrulline                      | 1.03 (0.9-1.18)  | 0.664 | 0.97 (0.87-1.1)  | 0.671 | 0.425 | HMDB00904  | citrulline                      | 1.05 (0.91-1.22) | 0.484 | 0.98 (0.87-1.11) | 0.804 | 0.283 |
| HMDB08928* | C34:2 PE                        | 0.91 (0.8-1.04)  | 0.168 | 1.04 (0.92-1.19) | 0.514 | 0.124 | HMDB08928* | C34:2 PE                        | 0.92 (0.8-1.06)  | 0.27  | 1.05 (0.92-1.21) | 0.457 | 0.283 |
| HMDB32390  | 2-methyl-4,5-benzoxazole        | 0.87 (0.76-1)    | 0.049 | 0.95 (0.85-1.07) | 0.409 | 0.448 | HMDB32390  | 2-methyl-4,5-benzoxazole        | 0.85 (0.73-0.98) | 0.022 | 0.97 (0.86-1.09) | 0.632 | 0.288 |
| HMDB00062  | carnitine                       | 0.88 (0.76-1.01) | 0.077 | 1.02 (0.91-1.14) | 0.769 | 0.123 | HMDB00062  | carnitine                       | 0.91 (0.78-1.06) | 0.212 | 1 (0.89-1.12)    | 0.994 | 0.288 |
| HMDB00177  | histidine                       | 0.94 (0.82-1.09) | 0.405 | 1.05 (0.94-1.18) | 0.393 | 0.226 | HMDB00177  | histidine                       | 0.95 (0.82-1.1)  | 0.479 | 1.04 (0.92-1.17) | 0.52  | 0.291 |
| HMDB13631  | oleoyl glycine                  | 1.1 (0.95-1.27)  | 0.202 | 1 (0.88-1.13)    | 0.992 | 0.508 | HMDB13631  | oleoyl glycine                  | 1.12 (0.97-1.3)  | 0.117 | 0.99 (0.87-1.12) | 0.867 | 0.293 |
| HMDB11420* | C38:7 PE plasmalogen            | 1.02 (0.88-1.18) | 0.819 | 1.11 (0.99-1.24) | 0.078 | 0.295 | HMDB11420* | C38:7 PE plasmalogen            | 1.08 (0.83-1.14) | 0.763 | 1.08 (0.96-1.21) | 0.224 | 0.298 |
| HMDB10379  | C14:0 LPC                       | 0.95 (0.83-1.09) | 0.465 | 1.04 (0.92-1.16) | 0.558 | 0.192 | HMDB10379  | C14:0 LPC                       | 0.94 (0.82-1.09) | 0.435 | 1.01 (0.89-1.14) | 0.887 | 0.301 |
| HMDB15168  | cerulenin                       | 0.91 (0.8-1.04)  | 0.187 | 0.99 (0.88-1.12) | 0.893 | 0.315 | HMDB15168  | cerulenin                       | 0.92 (0.8-1.05)  | 0.21  | 0.98 (0.87-1.11) | 0.786 | 0.302 |
| HMDB00162  | proline                         | 0.92 (0.79-1.06) | 0.23  | 1.02 (0.91-1.15) | 0.711 | 0.184 | HMDB00162  | proline                         | 0.98 (0.84-1.14) | 0.771 | 1.01 (0.9-1.14)  | 0.821 | 0.308 |
| HMDB02013  | C4 carnitine                    | 0.88 (0.77-1.01) | 0.071 | 1.01 (0.9-1.13)  | 0.841 | 0.129 | HMDB02013  | C4 carnitine                    | 0.91 (0.79-1.05) | 0.207 | 0.99 (0.88-1.11) | 0.872 | 0.309 |
| NA         | threosphingosine                | 1.02 (0.89-1.16) | 0.82  | 0.95 (0.84-1.06) | 0.359 | 0.454 | NA         | threosphingosine                | 1.07 (0.93-1.22) | 0.352 | 0.94 (0.83-1.06) | 0.286 | 0.324 |
| NA         | hydroxyectoine                  | 1.03 (0.89-1.18) | 0.712 | 0.98 (0.87-1.1)  | 0.691 | 0.46  | NA         | hydroxyectoine                  | 1.05 (0.91-1.21) | 0.533 | 0.99 (0.87-1.11) | 0.835 | 0.329 |
| HMDB13331  | C14:2 carnitine                 | 0.94 (0.81-1.09) | 0.426 | 1.03 (0.92-1.16) | 0.592 | 0.243 | HMDB13331  | C14:2 carnitine                 | 0.95 (0.81-1.11) | 0.524 | 1.03 (0.92-1.16) | 0.591 | 0.329 |
| HMDB00630* | cytosine_isomer                 | 1.03 (0.9-1.19)  | 0.644 | 0.96 (0.85-1.08) | 0.453 | 0.397 | HMDB00630* | cytosine_isomer                 | 1.04 (0.89-1.2)  | 0.64  | 0.93 (0.83-1.05) | 0.265 | 0.333 |
| HMDB34169  | methyl N-methylanthranilate     | 1.08 (0.95-1.23) | 0.26  | 0.99 (0.88-1.11) | 0.862 | 0.244 | HMDB34169  | methyl N-methylanthranilate     | 1.08 (0.94-1.24) | 0.27  | 0.99 (0.88-1.12) | 0.887 | 0.339 |
| HMDB00791  | C8 carnitine                    | 0.93 (0.8-1.09)  | 0.397 | 1.03 (0.92-1.16) | 0.612 | 0.216 | HMDB00791  | C8 carnitine                    | 0.93 (0.79-1.1)  | 0.406 | 1.02 (0.91-1.15) | 0.691 | 0.341 |
| HMDB02172  | diacetylspermine                | 0.93 (0.81-1.07) | 0.299 | 1.08 (0.97-1.22) | 0.166 | 0.164 | HMDB02172  | diacetylspermine                | 0.97 (0.84-1.13) | 0.726 | 1.09 (0.97-1.22) | 0.159 | 0.342 |
| HMDB00301  | urocanic acid                   | 1 (0.87-1.14)    | 0.988 | 0.95 (0.84-1.06) | 0.364 | 0.623 | HMDB00301  | urocanic acid                   | 1.01 (0.88-1.16) | 0.834 | 0.93 (0.83-1.05) | 0.226 | 0.348 |
| NA         | C34:1 DAG_or_TAG_fragment       | 0.91 (0.8-1.04)  | 0.151 | 1.03 (0.89-1.18) | 0.7   | 0.14  | NA         | C34:1 DAG_or_TAG_fragment       | 0.95 (0.82-1.09) | 0.459 | 1.01 (0.88-1.17) | 0.87  | 0.35  |
| HMDB08952* | C34:2 PE plasmalogen            | 1.05 (0.92-1.2)  | 0.435 | 1.01 (0.89-1.13) | 0.921 | 0.4   | HMDB08952* | C34:2 PE plasmalogen            | 1.05 (0.91-1.2)  | 0.508 | 1 (0.89-1.13)    | 1     | 0.354 |
| HMDB11229* | C38:7 PC plasmalogen            | 1.01 (0.87-1.17) | 0.897 | 1.07 (0.96-1.2)  | 0.223 | 0.509 | HMDB11229* | C38:7 PC plasmalogen            | 0.96 (0.82-1.12) | 0.601 | 1.06 (0.94-1.19) | 0.366 | 0.355 |
| NA         | C36:2 PS plasmalogen            | 1.02 (0.89-1.17) | 0.821 | 1.12 (1-1.26)    | 0.045 | 0.216 | NA         | C36:2 PS plasmalogen            | 1.03 (0.89-1.18) | 0.721 | 1.12 (1-1.26)    | 0.06  | 0.357 |
| HMDB02172  | N1,N12-diacetylspermine         | 0.93 (0.81-1.07) | 0.304 | 1.08 (0.96-1.21) | 0.189 | 0.175 | HMDB02172  | N1,N12-diacetylspermine         | 0.97 (0.84-1.13) | 0.726 | 1.09 (0.97-1.22) | 0.164 | 0.358 |
| HMDB12103  | C22:0 SM                        | 0.96 (0.83-1.1)  | 0.528 | 1.03 (0.92-1.17) | 0.57  | 0.32  | HMDB12103  | C22:0 SM                        | 0.97 (0.84-1.11) | 0.633 | 1.03 (0.91-1.17) | 0.605 | 0.361 |
| HMDB00929  | tryptophan                      | 1.05 (0.92-1.21) | 0.469 | 0.97 (0.86-1.09) | 0.574 | 0.3   | HMDB00929  | tryptophan                      | 1.06 (0.93-1.22) | 0.385 | 0.95 (0.84-1.07) | 0.426 | 0.363 |
| HMDB04949  | C16:0 Ceramide (d18:1)          | 1.05 (0.93-1.2)  | 0.411 | 0.98 (0.86-1.11) | 0.768 | 0.544 | HMDB04949  | C16:0 Ceramide (d18:1)          | 1.07 (0.94-1.23) | 0.297 | 0.97 (0.85-1.1)  | 0.665 | 0.365 |
| HMDB11506* | C18:1 LPE                       | 1.07 (0.92-1.24) | 0.395 | 0.98 (0.87-1.11) | 0.767 | 0.353 | HMDB11506* | C18:1 LPE                       | 1.06 (0.91-1.23) | 0.455 | 0.99 (0.88-1.12) | 0.92  | 0.373 |
| HMDB00651  | C10 carnitine                   | 0.94 (0.81-1.1)  | 0.447 | 1.02 (0.91-1.15) | 0.682 | 0.276 | HMDB00651  | C10 carnitine                   | 0.93 (0.8-1.09)  | 0.402 | 1.02 (0.9-1.15)  | 0.759 | 0.378 |
| HMDB13127  | C4-OH carnitine                 | 1.12 (0.97-1.31) | 0.125 | 1.06 (0.94-1.19) | 0.334 | 0.725 | HMDB13127  | C4-OH carnitine                 | 1.22 (1.04-1.44) | 0.016 | 1.07 (0.95-1.2)  | 0.274 | 0.386 |
| HMDB11478* | C18:3 LPE                       | 0.95 (0.82-1.09) | 0.463 | 1.02 (0.91-1.15) | 0.685 | 0.342 | HMDB11478* | C18:3 LPE                       | 0.97 (0.8-1.08)  | 0.336 | 1.02 (0.9-1.14)  | 0.794 | 0.403 |
| HMDB00725  | hydroxyproline                  | 0.97 (0.84-1.11) | 0.643 | 0.94 (0.84-1.06) | 0.325 | 0.629 | HMDB00725  | hydroxyproline                  | 1 (0.87-1.16)    | 0.966 | 0.95 (0.84-1.06) | 0.363 | 0.411 |

|            |                                |                  |       |                  |       |       |            |                                |                  |       |                  |       |       |
|------------|--------------------------------|------------------|-------|------------------|-------|-------|------------|--------------------------------|------------------|-------|------------------|-------|-------|
| HMDB10386* | C18:2 LPC                      | 1.1 (0.95-1.28)  | 0.186 | 1.02 (0.9-1.16)  | 0.707 | 0.265 | HMDB10386* | C18:2 LPC                      | 1.05 (0.9-1.23)  | 0.516 | 1.03 (0.91-1.17) | 0.663 | 0.412 |
| NA         | C16:1 SM                       | 0.94 (0.81-1.09) | 0.409 | 1.04 (0.92-1.18) | 0.511 | 0.18  | NA         | C16:1 SM                       | 0.97 (0.83-1.13) | 0.68  | 1.04 (0.91-1.18) | 0.561 | 0.422 |
| HMDB00133  | guanosine                      | 1.05 (0.9-1.23)  | 0.507 | 0.97 (0.87-1.08) | 0.584 | 0.389 | HMDB00133  | guanosine                      | 1.05 (0.9-1.23)  | 0.55  | 0.97 (0.87-1.09) | 0.628 | 0.423 |
| HMDB13678  | 4-hydroxyhippurate             | 0.96 (0.84-1.09) | 0.507 | 1.07 (0.96-1.21) | 0.228 | 0.196 | HMDB13678  | 4-hydroxyhippurate             | 0.96 (0.83-1.1)  | 0.515 | 1.06 (0.94-1.2)  | 0.328 | 0.438 |
| HMDB00824  | C3 carnitine                   | 0.88 (0.76-1.01) | 0.063 | 0.99 (0.88-1.11) | 0.905 | 0.149 | HMDB00824  | C3 carnitine                   | 0.91 (0.79-1.05) | 0.203 | 0.98 (0.87-1.1)  | 0.742 | 0.454 |
| HMDB12097  | C14:0 SM                       | 0.95 (0.82-1.1)  | 0.511 | 1.02 (0.91-1.15) | 0.742 | 0.331 | HMDB12097  | C14:0 SM                       | 0.94 (0.81-1.09) | 0.42  | 1 (0.89-1.13)    | 0.95  | 0.457 |
| HMDB10404  | C22:6 LPC                      | 1.04 (0.91-1.2)  | 0.546 | 1.09 (0.97-1.22) | 0.158 | 0.563 | HMDB10404  | C22:6 LPC                      | 1 (0.87-1.16)    | 0.991 | 1.06 (0.94-1.2)  | 0.317 | 0.459 |
| HMDB11745  | N-acetylmethionine             | 1.13 (0.99-1.29) | 0.072 | 1.02 (0.91-1.15) | 0.711 | 0.267 | HMDB11745  | N-acetylmethionine             | 1.14 (0.99-1.3)  | 0.065 | 1.03 (0.91-1.16) | 0.65  | 0.469 |
| HMDB05066  | C14 carnitine                  | 1.09 (0.94-1.26) | 0.251 | 1.02 (0.91-1.14) | 0.772 | 0.802 | HMDB05066  | C14 carnitine                  | 1.12 (0.96-1.3)  | 0.137 | 1.01 (0.9-1.13)  | 0.913 | 0.481 |
| HMDB00479  | methylhistidine                | 0.96 (0.83-1.1)  | 0.56  | 1.02 (0.91-1.14) | 0.703 | 0.63  | HMDB00479  | methylhistidine                | 0.95 (0.82-1.1)  | 0.512 | 1.01 (0.9-1.14)  | 0.827 | 0.486 |
| HMDB04620  | N-alpha-acetyarginine          | 1 (0.87-1.15)    | 0.976 | 0.93 (0.82-1.05) | 0.225 | 0.547 | HMDB04620  | N-alpha-acetyarginine          | 1.01 (0.87-1.16) | 0.939 | 0.93 (0.82-1.05) | 0.221 | 0.493 |
| HMDB00853  | acetyl-galactosamine           | 1.01 (0.88-1.15) | 0.909 | 1.03 (0.91-1.15) | 0.678 | 0.884 | HMDB00853  | acetyl-galactosamine           | 1.08 (0.94-1.24) | 0.288 | 1.02 (0.9-1.14)  | 0.807 | 0.494 |
| HMDB00991* | 2-aminooctanoic acid           | 0.98 (0.86-1.12) | 0.781 | 1.06 (0.94-1.19) | 0.371 | 0.602 | HMDB00991* | 2-aminooctanoic acid           | 0.99 (0.86-1.13) | 0.851 | 1.07 (0.95-1.21) | 0.263 | 0.499 |
| HMDB11756  | N-acetyllecucine               | 1.01 (0.89-1.15) | 0.899 | 1.01 (0.89-1.13) | 0.926 | 0.911 | HMDB11756  | N-acetyllecucine               | 1.05 (0.92-1.2)  | 0.495 | 1 (0.89-1.13)    | 0.967 | 0.52  |
| HMDB06347  | C26 carnitine                  | 1.02 (0.89-1.16) | 0.801 | 1.1 (0.98-1.23)  | 0.111 | 0.411 | HMDB06347  | C26 carnitine                  | 1.02 (0.89-1.18) | 0.725 | 1.11 (0.98-1.25) | 0.092 | 0.522 |
| HMDB13326  | C12:1 carnitine                | 0.95 (0.81-1.11) | 0.529 | 1.02 (0.91-1.14) | 0.761 | 0.292 | HMDB13326  | C12:1 carnitine                | 0.97 (0.82-1.14) | 0.703 | 1.02 (0.9-1.14)  | 0.797 | 0.524 |
| HMDB01991  | 7-methylxanthine               | 1.08 (0.94-1.25) | 0.276 | 0.97 (0.87-1.09) | 0.625 | 0.344 | HMDB01991  | 7-methylxanthine               | 1.11 (0.96-1.29) | 0.174 | 0.99 (0.88-1.11) | 0.839 | 0.531 |
| HMDB00001  | 1-methylhistidine              | 0.96 (0.83-1.1)  | 0.537 | 1.02 (0.91-1.14) | 0.793 | 0.648 | HMDB00001  | 1-methylhistidine              | 0.95 (0.82-1.09) | 0.46  | 1 (0.89-1.13)    | 0.941 | 0.536 |
| HMDB00696  | methionine                     | 1.02 (0.88-1.19) | 0.748 | 1.01 (0.9-1.13)  | 0.885 | 0.986 | HMDB00696  | methionine                     | 1.06 (0.91-1.23) | 0.47  | 0.99 (0.88-1.11) | 0.88  | 0.537 |
| HMDB11394* | C40:7 PE plasmalogen           | 1.09 (0.95-1.25) | 0.237 | 1.13 (1.01-1.27) | 0.037 | 0.712 | HMDB11394* | C40:7 PE plasmalogen           | 1.05 (0.9-1.21)  | 0.556 | 1.13 (1-1.27)    | 0.049 | 0.541 |
| HMDB00033  | carnosine                      | 1.02 (0.89-1.17) | 0.773 | 0.95 (0.84-1.06) | 0.325 | 0.47  | HMDB00033  | carnosine                      | 1.03 (0.9-1.2)   | 0.647 | 0.94 (0.83-1.05) | 0.257 | 0.55  |
| HMDB10383* | C16:1 LPC                      | 1 (0.87-1.15)    | 0.953 | 0.96 (0.86-1.08) | 0.487 | 0.832 | HMDB10383* | C16:1 LPC                      | 1.01 (0.88-1.17) | 0.883 | 0.95 (0.84-1.07) | 0.39  | 0.551 |
| HMDB00544  | 5-hydroxymethyl-4-methyluracil | 0.99 (0.86-1.13) | 0.865 | 0.93 (0.83-1.04) | 0.215 | 0.574 | HMDB00544  | 5-hydroxymethyl-4-methyluracil | 1 (0.87-1.16)    | 0.966 | 0.92 (0.82-1.04) | 0.174 | 0.558 |
| HMDB10403  | C22:5 LPC                      | 1.01 (0.88-1.16) | 0.929 | 0.93 (0.83-1.05) | 0.247 | 0.398 | HMDB10403  | C22:5 LPC                      | 0.98 (0.85-1.13) | 0.785 | 0.93 (0.83-1.05) | 0.258 | 0.56  |
| HMDB13287  | N6,N6-dimethyllysine           | 0.98 (0.85-1.12) | 0.753 | 0.93 (0.83-1.04) | 0.221 | 0.524 | HMDB13287  | N6,N6-dimethyllysine           | 0.99 (0.86-1.14) | 0.931 | 0.94 (0.84-1.06) | 0.303 | 0.563 |
| HMDB11511  | C20:0 LPE                      | 1.11 (0.97-1.26) | 0.135 | 1.03 (0.91-1.17) | 0.651 | 0.475 | HMDB11511  | C20:0 LPE                      | 1.08 (0.94-1.25) | 0.265 | 1.04 (0.91-1.18) | 0.563 | 0.567 |
| HMDB00991* | 2-aminooctanoic acid           | 1.01 (0.88-1.15) | 0.91  | 0.95 (0.84-1.07) | 0.386 | 0.494 | HMDB00991* | 2-aminooctanoic acid           | 0.99 (0.87-1.14) | 0.923 | 0.96 (0.85-1.08) | 0.526 | 0.573 |
| HMDB02064  | N-acetylputrescine             | 0.93 (0.81-1.07) | 0.326 | 1.01 (0.89-1.14) | 0.879 | 0.381 | HMDB02064  | N-acetylputrescine             | 0.93 (0.81-1.08) | 0.358 | 1 (0.88-1.13)    | 0.98  | 0.576 |
| HMDB00182  | lysine                         | 0.9 (0.78-1.05)  | 0.174 | 1.03 (0.91-1.18) | 0.61  | 0.148 | HMDB00182  | lysine                         | 0.95 (0.81-1.11) | 0.521 | 1 (0.88-1.14)    | 0.971 | 0.581 |
| HMDB01348  | C18:0 SM                       | 1.06 (0.93-1.21) | 0.396 | 1.03 (0.91-1.17) | 0.602 | 0.973 | HMDB01348  | C18:0 SM                       | 1.1 (0.96-1.27)  | 0.176 | 1.01 (0.89-1.15) | 0.844 | 0.587 |
| HMDB04620  | N-alpha-acetylarginine         | 0.98 (0.85-1.12) | 0.726 | 0.94 (0.83-1.06) | 0.285 | 0.768 | HMDB04620  | N-alpha-acetylarginine         | 0.99 (0.86-1.13) | 0.842 | 0.93 (0.82-1.05) | 0.248 | 0.587 |
| HMDB12102  | C20:0 SM                       | 1 (0.87-1.16)    | 0.986 | 1.04 (0.93-1.18) | 0.478 | 0.536 | HMDB12102  | C20:0 SM                       | 1 (0.86-1.16)    | 0.988 | 1.03 (0.91-1.17) | 0.619 | 0.587 |
| HMDB11211* | C34:3 PC plasmalogen           | 1.13 (0.99-1.29) | 0.08  | 1.06 (0.93-1.2)  | 0.381 | 0.457 | HMDB11211* | C34:3 PC plasmalogen           | 1.08 (0.94-1.25) | 0.279 | 1.07 (0.94-1.21) | 0.328 | 0.61  |
| HMDB10407* | C16:1 LPC plasmalogen          | 1.08 (0.94-1.24) | 0.276 | 1.03 (0.92-1.16) | 0.612 | 0.653 | HMDB10407* | C16:1 LPC plasmalogen          | 1.06 (0.92-1.22) | 0.407 | 1.03 (0.91-1.16) | 0.664 | 0.617 |
| HMDB00259  | serotonin                      | 1.07 (0.94-1.22) | 0.296 | 1.03 (0.91-1.16) | 0.68  | 0.56  | HMDB00259  | serotonin                      | 1.08 (0.95-1.24) | 0.239 | 1.02 (0.9-1.16)  | 0.705 | 0.638 |
| HMDB01431  | pyridoxamine                   | 0.88 (0.76-1.02) | 0.099 | 1 (0.88-1.14)    | 0.994 | 0.16  | HMDB01431  | pyridoxamine                   | 0.93 (0.8-1.09)  | 0.383 | 0.97 (0.85-1.1)  | 0.628 | 0.647 |
| HMDB13288  | C9 carnitine                   | 0.99 (0.86-1.14) | 0.895 | 1.01 (0.9-1.13)  | 0.853 | 0.716 | HMDB13288  | C9 carnitine                   | 0.96 (0.83-1.11) | 0.566 | 1.01 (0.9-1.13)  | 0.865 | 0.655 |
| HMDB00699  | 1-methylnicotinamide           | 0.96 (0.83-1.1)  | 0.537 | 1.03 (0.91-1.15) | 0.674 | 0.482 | HMDB00699  | 1-methylnicotinamide           | 0.93 (0.8-1.08)  | 0.332 | 1 (0.89-1.13)    | 0.995 | 0.659 |
| HMDB04824  | N2,N2-dimethylguanosine        | 0.88 (0.76-1.01) | 0.07  | 0.98 (0.87-1.1)  | 0.691 | 0.344 | HMDB04824  | N2,N2-dimethylguanosine        | 0.93 (0.8-1.08)  | 0.317 | 0.97 (0.86-1.1)  | 0.671 | 0.679 |
| HMDB00206  | N6-acetyllysine                | 0.96 (0.84-1.1)  | 0.554 | 0.94 (0.83-1.05) | 0.282 | 0.852 | HMDB00206  | N6-acetyllysine                | 0.98 (0.85-1.12) | 0.74  | 0.95 (0.84-1.07) | 0.359 | 0.68  |
| HMDB29416  | NMMA                           | 1 (0.86-1.15)    | 0.951 | 0.99 (0.87-1.13) | 0.919 | 0.888 | HMDB29416  | NMMA                           | 1.04 (0.89-1.21) | 0.607 | 0.97 (0.85-1.11) | 0.687 | 0.686 |
| HMDB11517  | C20:4 LPE                      | 1.01 (0.88-1.17) | 0.882 | 1.04 (0.93-1.17) | 0.494 | 0.659 | HMDB11517  | C20:4 LPE                      | 1.02 (0.88-1.18) | 0.829 | 1.05 (0.94-1.19) | 0.382 | 0.702 |
| HMDB00043  | betaine                        | 0.99 (0.86-1.14) | 0.883 | 1.03 (0.91-1.17) | 0.636 | 0.708 | HMDB00043  | betaine                        | 1 (0.87-1.16)    | 0.997 | 1.03 (0.91-1.18) | 0.613 | 0.704 |
| HMDB03681  | 4-acetamidobutanoate           | 0.96 (0.83-1.1)  | 0.539 | 0.96 (0.85-1.08) | 0.503 | 0.95  | HMDB03681  | 4-acetamidobutanoate           | 0.97 (0.83-1.12) | 0.645 | 0.94 (0.84-1.07) | 0.359 | 0.711 |
| HMDB59824  | 4-hydroxy-3-methylacetophenone | 0.99 (0.87-1.12) | 0.821 | 0.96 (0.85-1.09) | 0.555 | 0.813 | HMDB59824  | 4-hydroxy-3-methylacetophenone | 1 (0.87-1.14)    | 0.961 | 0.96 (0.85-1.08) | 0.508 | 0.712 |
| HMDB02250  | C12 carnitine                  | 0.99 (0.85-1.15) | 0.896 | 1 (0.9-1.13)     | 0.937 | 0.587 | HMDB02250  | C12 carnitine                  | 0.98 (0.84-1.15) | 0.813 | 1 (0.89-1.13)    | 0.96  | 0.722 |
| HMDB00897  | 7-methylguanane                | 0.98 (0.85-1.12) | 0.751 | 0.98 (0.87-1.09) | 0.709 | 0.985 | HMDB00897  | 7-methylguanane                | 1.01 (0.88-1.17) | 0.873 | 0.97 (0.86-1.08) | 0.559 | 0.731 |
| HMDB00026  | N-carbamoyl-beta-alanine       | 0.97 (0.85-1.11) | 0.675 | 0.97 (0.86-1.09) | 0.6   | 0.91  | HMDB00026  | N-carbamoyl-beta-alanine       | 0.97 (0.85-1.12) | 0.707 | 0.97 (0.86-1.09) | 0.582 | 0.731 |
| NA         | C46:3 TAG                      | 0.94 (0.81-1.07) | 0.345 | 0.94 (0.83-1.06) | 0.297 | 0.628 | NA         | C46:3 TAG                      | 0.95 (0.82-1.09) | 0.448 | 0.94 (0.83-1.06) | 0.293 | 0.746 |
| HMDB00462  | allantoin                      | 0.94 (0.82-1.08) | 0.387 | 0.95 (0.84-1.08) | 0.439 | 0.765 | HMDB00462  | allantoin                      | 1 (0.87-1.16)    | 0.987 | 0.95 (0.84-1.08) | 0.473 | 0.751 |
| HMDB10387* | C18:3 LPC                      | 0.99 (0.87-1.13) | 0.927 | 0.98 (0.87-1.11) | 0.779 | 0.886 | HMDB10387* | C18:3 LPC                      | 0.99 (0.87-1.13) | 0.887 | 0.96 (0.85-1.09) | 0.552 | 0.755 |
| HMDB00201  | C2 carnitine                   | 1 (0.87-1.15)    | 0.999 | 1 (0.89-1.12)    | 0.965 | 0.661 | HMDB00201  | C2 carnitine                   | 1.06 (0.92-1.24) | 0.409 | 0.99 (0.87-1.11) | 0.807 | 0.76  |
| HMDB04953* | C24:1 Ceramide (d18:1)         | 0.98 (0.87-1.11) | 0.794 | 1.01 (0.89-1.14) | 0.883 | 0.626 | HMDB04953* | C24:1 Ceramide (d18:1)         | 0.98 (0.87-1.12) | 0.815 | 1 (0.89-1.14)    | 0.942 | 0.76  |
| HMDB01257  | spermidine                     | 1.06 (0.92-1.23) | 0.393 | 1.12 (1-1.25)    | 0.053 | 0.781 | HMDB01257  | spermidine                     | 1.1 (0.95-1.27)  | 0.218 | 1.11 (0.99-1.25) | 0.067 | 0.763 |
| HMDB11410* | C36:5 PE plasmalogen           | 1.03 (0.9-1.18)  | 0.622 | 1.04 (0.93-1.17) | 0.495 | 0.908 | HMDB11410* | C36:5 PE plasmalogen           | 1.04 (0.91-1.19) | 0.586 | 1.03 (0.92-1.16) | 0.588 | 0.778 |

|                   |                           |                  |       |                  |       |       |                   |                           |                  |       |                  |       |       |
|-------------------|---------------------------|------------------|-------|------------------|-------|-------|-------------------|---------------------------|------------------|-------|------------------|-------|-------|
| HMDB00158         | tyrosine                  | 0.95 (0.82-1.1)  | 0.507 | 1.01 (0.9-1.14)  | 0.896 | 0.397 | HMDB00158         | tyrosine                  | 1.02 (0.88-1.2)  | 0.761 | 0.98 (0.87-1.11) | 0.79  | 0.783 |
| HMDB00715         | kynurenic acid            | 0.87 (0.76-1)    | 0.05  | 0.9 (0.8-1.01)   | 0.08  | 0.754 | HMDB00715         | kynurenic acid            | 0.87 (0.76-1.01) | 0.06  | 0.88 (0.78-0.99) | 0.04  | 0.788 |
| HMDB15150         | sulfamethoxazole          | 1.05 (0.91-1.2)  | 0.498 | 1.02 (0.91-1.15) | 0.675 | 0.732 | HMDB15150         | sulfamethoxazole          | 1.05 (0.91-1.21) | 0.473 | 1.02 (0.91-1.14) | 0.762 | 0.791 |
| HMDB07869*        | C30:0 PC                  | 0.98 (0.85-1.12) | 0.743 | 1 (0.88-1.12)    | 0.941 | 0.678 | HMDB07869*        | C30:0 PC                  | 0.96 (0.83-1.11) | 0.568 | 0.96 (0.85-1.09) | 0.55  | 0.792 |
| HMDB08925*        | C34:0 PE                  | 1.03 (0.9-1.18)  | 0.651 | 1 (0.89-1.12)    | 0.973 | 0.87  | HMDB08925*        | C34:0 PE                  | 1.02 (0.89-1.17) | 0.808 | 0.98 (0.87-1.1)  | 0.745 | 0.799 |
| HMDB13713         | N-acetyltryptophan        | 0.99 (0.87-1.14) | 0.916 | 0.95 (0.85-1.07) | 0.405 | 0.583 | HMDB13713         | N-acetyltryptophan        | 0.95 (0.83-1.1)  | 0.505 | 0.94 (0.83-1.05) | 0.278 | 0.8   |
| HMDB11253*        | C38:5 PE plasmalogen      | 1.03 (0.9-1.19)  | 0.666 | 1.03 (0.92-1.15) | 0.588 | 0.786 | HMDB11253*        | C38:5 PE plasmalogen      | 1.04 (0.9-1.2)   | 0.574 | 1.04 (0.93-1.17) | 0.474 | 0.808 |
| HMDB10169         | C16:0 SM                  | 1.07 (0.94-1.23) | 0.314 | 1.06 (0.94-1.19) | 0.356 | 0.899 | HMDB10169         | C16:0 SM                  | 1.07 (0.93-1.23) | 0.376 | 1.05 (0.93-1.18) | 0.417 | 0.809 |
| HMDB00210         | pantothenate              | 1.01 (0.88-1.15) | 0.938 | 1.07 (0.95-1.21) | 0.265 | 0.404 | HMDB00210         | pantothenate              | 1.03 (0.9-1.19)  | 0.674 | 1.04 (0.92-1.18) | 0.534 | 0.811 |
| NA                | ectoine                   | 1.02 (0.89-1.16) | 0.807 | 1 (0.9-1.13)     | 0.937 | 0.775 | NA                | ectoine                   | 1.01 (0.88-1.16) | 0.868 | 1 (0.89-1.13)    | 0.934 | 0.822 |
| HMDB03282         | 1-methylguanine           | 0.97 (0.85-1.11) | 0.627 | 1.03 (0.92-1.15) | 0.636 | 0.611 | HMDB03282         | 1-methylguanine           | 1 (0.87-1.15)    | 0.986 | 1.02 (0.9-1.14)  | 0.794 | 0.823 |
| HMDB10384         | C18:0 LPC                 | 1.03 (0.9-1.18)  | 0.635 | 1.05 (0.93-1.18) | 0.454 | 0.822 | HMDB10384         | C18:0 LPC                 | 1.03 (0.9-1.18)  | 0.685 | 1.05 (0.93-1.18) | 0.443 | 0.826 |
| NA                | 2-aminohippuric acid      | 0.85 (0.74-0.98) | 0.024 | 0.87 (0.77-0.97) | 0.018 | 0.945 | NA                | 2-aminohippuric acid      | 0.86 (0.75-0.99) | 0.041 | 0.87 (0.76-0.98) | 0.02  | 0.828 |
| HMDB06344         | phenylacetylglutamine     | 0.9 (0.79-1.03)  | 0.127 | 0.91 (0.81-1.03) | 0.132 | 0.709 | HMDB06344         | phenylacetylglutamine     | 0.89 (0.78-1.02) | 0.105 | 0.93 (0.82-1.05) | 0.234 | 0.834 |
| HMDB00168         | asparagine                | 1.12 (0.97-1.29) | 0.13  | 1.1 (0.98-1.25)  | 0.109 | 0.91  | HMDB00168         | asparagine                | 1.11 (0.95-1.29) | 0.183 | 1.09 (0.97-1.24) | 0.159 | 0.838 |
| HMDB10382         | C16:0 LPC                 | 1.01 (0.88-1.15) | 0.924 | 1.04 (0.92-1.17) | 0.525 | 0.628 | HMDB10382         | C16:0 LPC                 | 1 (0.87-1.14)    | 0.976 | 1.03 (0.91-1.16) | 0.684 | 0.842 |
| HMDB10395         | C20:4 LPC                 | 1.03 (0.9-1.18)  | 0.671 | 1 (0.89-1.12)    | 0.965 | 0.672 | HMDB10395         | C20:4 LPC                 | 1.01 (0.88-1.17) | 0.853 | 1 (0.89-1.13)    | 0.997 | 0.845 |
| HMDB00092         | dimethylglycine           | 0.97 (0.85-1.12) | 0.712 | 1.05 (0.94-1.18) | 0.393 | 0.371 | HMDB00092         | dimethylglycine           | 1.05 (0.91-1.21) | 0.527 | 1.05 (0.94-1.18) | 0.412 | 0.859 |
| HMDB05015         | gabapentin                | 1 (0.89-1.13)    | 0.999 | 1.01 (0.89-1.15) | 0.841 | 0.931 | HMDB05015         | gabapentin                | 1.02 (0.9-1.15)  | 0.792 | 1 (0.88-1.14)    | 0.962 | 0.868 |
| NA                | C44:2 TAG                 | 0.95 (0.82-1.09) | 0.446 | 0.92 (0.81-1.03) | 0.158 | 0.933 | NA                | C44:2 TAG                 | 0.95 (0.82-1.1)  | 0.52  | 0.91 (0.8-1.03)  | 0.137 | 0.868 |
| HMDB01325         | N6,N6,N6-trimethyllysine  | 0.97 (0.85-1.12) | 0.704 | 0.99 (0.89-1.11) | 0.902 | 0.916 | HMDB01325         | N6,N6,N6-trimethyllysine  | 0.97 (0.84-1.11) | 0.641 | 0.98 (0.87-1.1)  | 0.758 | 0.873 |
| HMDB11507*        | C18:2 LPE                 | 1.03 (0.89-1.19) | 0.701 | 1.02 (0.91-1.15) | 0.747 | 0.905 | HMDB11507*        | C18:2 LPE                 | 1.02 (0.87-1.18) | 0.836 | 1.03 (0.91-1.16) | 0.617 | 0.877 |
| HMDB11220*        | C36:5 PC plasmalogen      | 1.01 (0.88-1.16) | 0.884 | 1.01 (0.9-1.13)  | 0.856 | 0.924 | HMDB11220*        | C36:5 PC plasmalogen      | 1 (0.87-1.15)    | 0.993 | 1.01 (0.9-1.14)  | 0.84  | 0.877 |
| HMDB01855         | 5-hydroxytryptophol       | 1.1 (0.97-1.27)  | 0.149 | 1.06 (0.94-1.2)  | 0.315 | 0.538 | HMDB01855         | 5-hydroxytryptophol       | 1.07 (0.94-1.24) | 0.311 | 1.06 (0.94-1.19) | 0.365 | 0.888 |
| HMDB03334         | SDMA                      | 0.96 (0.83-1.11) | 0.58  | 1.01 (0.9-1.13)  | 0.889 | 0.732 | HMDB03334         | SDMA                      | 0.96 (0.83-1.12) | 0.625 | 1 (0.89-1.12)    | 0.988 | 0.889 |
| HMDB00112         | GABA                      | 1.01 (0.88-1.16) | 0.897 | 1.05 (0.93-1.19) | 0.391 | 0.643 | HMDB00112         | GABA                      | 1.04 (0.91-1.2)  | 0.544 | 1.04 (0.92-1.18) | 0.5   | 0.894 |
| HMDB00898         | 1-methylhistamine         | 1.04 (0.91-1.19) | 0.593 | 1.02 (0.91-1.14) | 0.773 | 0.931 | HMDB00898         | 1-methylhistamine         | 1.04 (0.91-1.2)  | 0.542 | 1.01 (0.9-1.13)  | 0.877 | 0.894 |
| Internal Standard | phenylalanine-d8          | 0.99 (0.84-1.15) | 0.859 | 1.03 (0.92-1.14) | 0.634 | 0.693 | Internal Standard | phenylalanine-d8          | 1.04 (0.88-1.22) | 0.654 | 1.02 (0.92-1.14) | 0.716 | 0.895 |
| NA                | C46:2 TAG                 | 0.94 (0.81-1.07) | 0.347 | 0.92 (0.82-1.04) | 0.184 | 0.776 | NA                | C46:2 TAG                 | 0.94 (0.81-1.09) | 0.421 | 0.92 (0.81-1.04) | 0.164 | 0.906 |
| HMDB01414         | putrescine                | 1.11 (0.97-1.27) | 0.124 | 1.07 (0.95-1.21) | 0.279 | 0.552 | HMDB01414         | putrescine                | 1.11 (0.97-1.27) | 0.133 | 1.08 (0.96-1.22) | 0.22  | 0.908 |
| HMDB00853         | N-acetylgalactosamine     | 1.01 (0.88-1.15) | 0.917 | 1.05 (0.93-1.18) | 0.43  | 0.575 | HMDB00853         | N-acetylgalactosamine     | 1.1 (0.96-1.27)  | 0.188 | 1.05 (0.93-1.18) | 0.459 | 0.911 |
| HMDB01476         | 3-hydroxyanthranilic acid | 1 (0.87-1.14)    | 0.946 | 1.02 (0.91-1.14) | 0.784 | 0.859 | HMDB01476         | 3-hydroxyanthranilic acid | 0.99 (0.86-1.13) | 0.865 | 1 (0.89-1.12)    | 0.975 | 0.913 |
| HMDB07973*        | C34:2 PC                  | 0.97 (0.85-1.12) | 0.697 | 1.03 (0.91-1.17) | 0.603 | 0.525 | HMDB07973*        | C34:2 PC                  | 0.98 (0.85-1.13) | 0.741 | 1.03 (0.91-1.17) | 0.654 | 0.919 |
| HMDB00167         | threonine                 | 1.01 (0.87-1.18) | 0.868 | 1.03 (0.91-1.17) | 0.652 | 0.638 | HMDB00167         | threonine                 | 1.04 (0.89-1.22) | 0.637 | 1.01 (0.88-1.15) | 0.911 | 0.927 |
| HMDB00248         | thyroxine                 | 0.99 (0.85-1.14) | 0.84  | 1 (0.89-1.13)    | 0.934 | 0.691 | HMDB00248         | thyroxine                 | 1.01 (0.87-1.18) | 0.846 | 1.01 (0.89-1.13) | 0.914 | 0.928 |
| NA                | C36:3 PS plasmalogen      | 0.98 (0.85-1.14) | 0.812 | 1 (0.9-1.12)     | 0.975 | 0.68  | NA                | C36:3 PS plasmalogen      | 1 (0.85-1.17)    | 0.956 | 0.99 (0.88-1.11) | 0.878 | 0.936 |
| Internal Standard | valine-d8                 | 1 (0.86-1.16)    | 0.976 | 1 (0.9-1.11)     | 0.995 | 0.962 | Internal Standard | valine-d8                 | 1.03 (0.88-1.19) | 0.748 | 1 (0.9-1.12)     | 0.941 | 0.938 |
| HMDB02014         | C14:1 carnitine           | 1.01 (0.87-1.17) | 0.93  | 1.01 (0.9-1.13)  | 0.862 | 0.694 | HMDB02014         | C14:1 carnitine           | 1.02 (0.88-1.2)  | 0.763 | 1.01 (0.9-1.13)  | 0.92  | 0.938 |
| HMDB00875         | trigonelline              | 0.96 (0.83-1.1)  | 0.514 | 0.95 (0.84-1.07) | 0.403 | 0.925 | HMDB00875         | trigonelline              | 0.94 (0.81-1.08) | 0.369 | 0.95 (0.84-1.08) | 0.428 | 0.947 |
| HMDB11503         | C16:0 LPE                 | 1.04 (0.91-1.19) | 0.53  | 1.05 (0.92-1.19) | 0.491 | 0.802 | HMDB11503         | C16:0 LPE                 | 1.03 (0.89-1.18) | 0.723 | 1.03 (0.9-1.18)  | 0.637 | 0.958 |
| HMDB00767         | pseudouridine             | 0.94 (0.82-1.08) | 0.399 | 0.97 (0.86-1.09) | 0.562 | 0.786 | HMDB00767         | pseudouridine             | 0.99 (0.85-1.15) | 0.845 | 0.96 (0.86-1.09) | 0.547 | 0.96  |
| HMDB00925         | trimethylamine-N-oxide    | 1 (0.87-1.15)    | 0.975 | 1.02 (0.91-1.14) | 0.725 | 0.734 | HMDB00925         | trimethylamine-N-oxide    | 1.03 (0.9-1.19)  | 0.674 | 1.03 (0.92-1.16) | 0.618 | 0.962 |
| HMDB00064         | creatine                  | 1.07 (0.92-1.23) | 0.391 | 1.13 (1-1.28)    | 0.046 | 0.403 | HMDB00064         | creatine                  | 1.12 (0.96-1.3)  | 0.152 | 1.12 (0.99-1.27) | 0.076 | 0.968 |
| HMDB00054         | bilirubin                 | 0.95 (0.81-1.11) | 0.497 | 0.95 (0.85-1.06) | 0.365 | 0.911 | HMDB00054         | bilirubin                 | 0.95 (0.81-1.11) | 0.532 | 0.95 (0.85-1.05) | 0.311 | 0.973 |
| HMDB00719         | homoserine                | 1.01 (0.87-1.18) | 0.883 | 1.04 (0.91-1.18) | 0.575 | 0.59  | HMDB00719         | homoserine                | 1.04 (0.88-1.22) | 0.668 | 1.02 (0.89-1.16) | 0.823 | 0.973 |
| HMDB01276         | N1-acetylspermidine       | 1.06 (0.92-1.24) | 0.408 | 1.15 (1.03-1.3)  | 0.016 | 0.686 | HMDB01276         | N1-acetylspermidine       | 1.13 (0.97-1.32) | 0.117 | 1.15 (1.02-1.3)  | 0.021 | 0.976 |
| HMDB02000         | myristoleic acid          | 0.97 (0.84-1.12) | 0.651 | 0.93 (0.83-1.03) | 0.169 | 0.721 | HMDB02000         | myristoleic acid          | 0.99 (0.85-1.15) | 0.871 | 0.94 (0.84-1.05) | 0.299 | 0.985 |
| HMDB01539         | ADMA                      | 0.96 (0.83-1.11) | 0.582 | 0.99 (0.88-1.1)  | 0.802 | 0.685 | HMDB01539         | ADMA                      | 1.01 (0.87-1.17) | 0.938 | 0.99 (0.88-1.11) | 0.888 | 0.989 |
| HMDB00705         | C6 carnitine              | 0.96 (0.83-1.12) | 0.639 | 1 (0.89-1.13)    | 0.989 | 0.468 | HMDB00705         | C6 carnitine              | 1 (0.86-1.17)    | 0.994 | 0.98 (0.87-1.11) | 0.792 | 0.992 |
| NA                | C20:4 carnitine           | 1.04 (0.91-1.2)  | 0.558 | 1 (0.9-1.13)     | 0.943 | 0.645 | NA                | C20:4 carnitine           | 1.05 (0.91-1.21) | 0.492 | 1.02 (0.91-1.14) | 0.755 | 0.999 |
